# Supplementary material for: Computational Exploration of Dirhodium Complex-Catalyzed Selective Intermolecular Amination of Tertiary vs. Benzylic C−H Bonds
Source: MDPI journal article supplement (doi:10.3390/molecules28041928), 2023-02-17
Supplement: s1 [file s1]

## Supplementary Materials

# Computational Exploration of Dirhodium Complex-Catalyzed Selective Intermolecular Amination of Tertiary vs. Benzylic C–H Bonds

Xingxing Su, Xiahe Chen, Debo Ding, Yuan-Bin She\* and Yun-Fang Yang\*

College of Chemical Engineering, Zhejiang University of Technology, Hangzhou, Zhejiang  
310014, China

\*E-mail: yangyf@zjut.edu.cn

\*E-mail: sheyb@zjut.edu.cn

## Table of Contents

|                                                                                                                                 |     |
|---------------------------------------------------------------------------------------------------------------------------------|-----|
| The phthaloyl face and <i>tert</i> -butyl face of Rh <sub>2</sub> (S-tfpptl) <sub>4</sub> <b>1</b> . .....                      | S2  |
| Optimized geometries and energies of conformers for triplet state dirhodium catalyst. ....                                      | S2  |
| The dirhodium–nitrene formation process. ....                                                                                   | S3  |
| The energies and the <S <sup>2</sup> > value of the Rh–nitrene intermediate <b>2</b> . ....                                     | S4  |
| Calculated spin densities of selected atoms in the optimized structures for Rh–nitrene <b>2</b> . ....                          | S5  |
| The binding of the nitrene to the <i>tert</i> -butyl face. ....                                                                 | S5  |
| The IRC pathway for the <sup>1</sup> TS2. ....                                                                                  | S6  |
| Free energy profiles of Rh <sub>2</sub> (S-tfpptl) <sub>4</sub> -catalyzed intermolecular C–H aminations. ....                  | S7  |
| The calculated spin densities for selected atoms of the species in tertiary and benzylic C–H aminations. ....                   | S7  |
| Optimized geometries of <sup>3</sup> TS3' and <sup>3</sup> TS4'. ....                                                           | S8  |
| The interaction energy for the C <sub>6</sub> H <sub>6</sub> -phthalimido complex with the eclipsed face-face orientation. .... | S9  |
| Optimized geometries of <sup>3</sup> TS7, <sup>3</sup> TS8, <sup>3</sup> TS3- <i>CI</i> and <sup>3</sup> TS4- <i>CI</i> . ....  | S9  |
| The two-layer ONIOM approach. ....                                                                                              | S10 |
| Optimized geometries and energies of conformers for <b>2</b> . ....                                                             | S10 |
| Optimized geometries and energies of conformers for <b>Sub</b> . ....                                                           | S11 |
| The schematic of the dirhodium–nitrene: substrate adducts displaying the substrate fitting in the catalytic pocket. ....        | S11 |
| Optimized geometries and energies of conformers for <sup>1</sup> TS1. ....                                                      | S12 |
| Optimized geometries and energies of conformers for <sup>1</sup> TS2. ....                                                      | S13 |
| Optimized geometries and energies of conformers for <sup>3</sup> TS3. ....                                                      | S14 |
| Optimized geometries and energies of conformers for <sup>3</sup> TS4. ....                                                      | S15 |
| Optimized geometries and energies of conformers for <sup>3</sup> TS7 and <sup>3</sup> TS8. ....                                 | S16 |
| The energies of the key transition states using different functionals. ....                                                     | S17 |
| Optimized geometries of <sup>3</sup> TS3 and <sup>3</sup> TS4 with different functionals. ....                                  | S17 |
| Energies and free energies of the calculated structures. ....                                                                   | S18 |
| Cartesian coordinates of the structures. ....                                                                                   | S19 |

## 1. Results

### 1.1 The dirhodium complex $\text{Rh}_2(\text{S-tfpptl})_4$

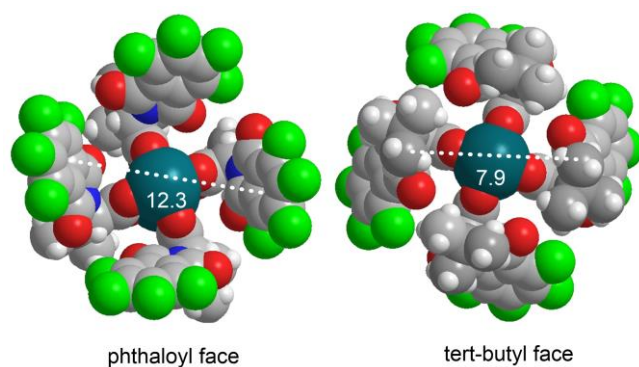

**Figure S1.** The phthaloyl face and *tert*-butyl face of  $\text{Rh}_2(\text{S-tfpptl})_4$  **1**. The pocket diameters are labeled. The distances are shown in Å.

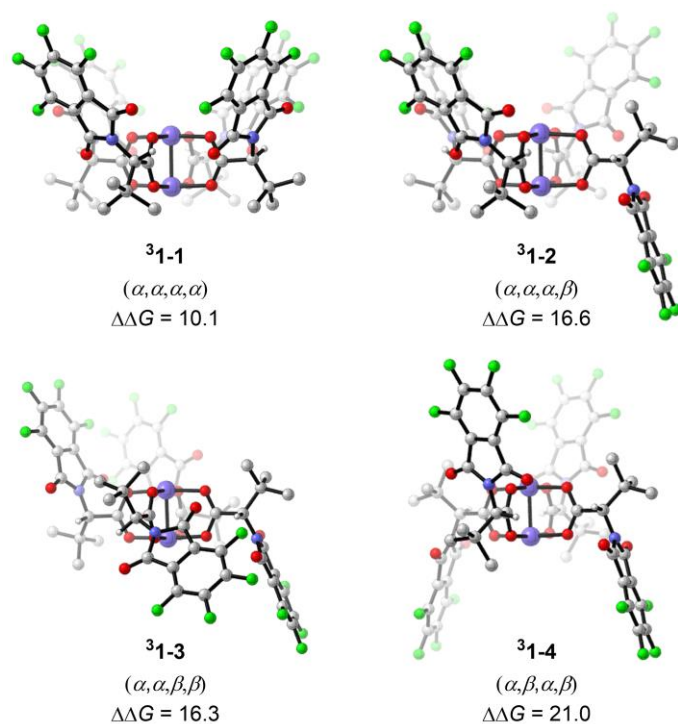

**Figure S2.** Optimized geometries and energies of triplet state dirhodium catalyst conformers. Free energy obtained at the M06/def2-TZVP//BPW91/6-31G\*-LANL2DZ level. Energies are shown in kcal mol<sup>-1</sup>. The H atoms of *t*Bu groups and aryl groups were omitted for clarity.

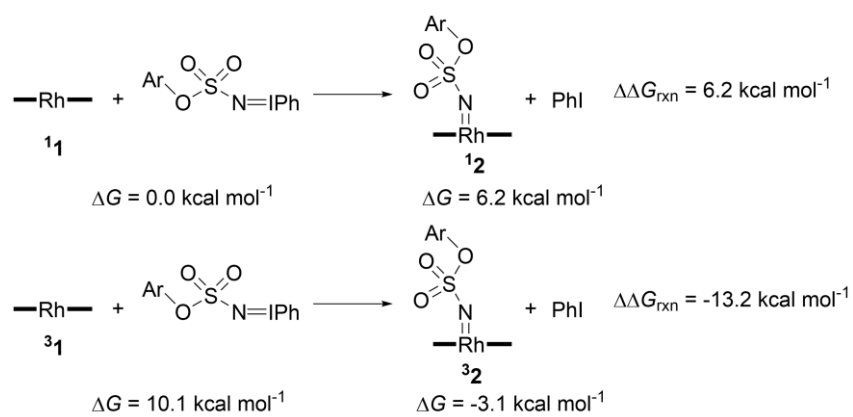

**Figure S3.** The energetics for the formation of dirhodium–nitrene.

## 1.2 The Dirhodium–nitrene complex

The singlet **12** was first optimized by the restricted DFT method. Further analysis performed with the *stable=opt* keyword suggested the instability of the restricted wave function. The reoptimization was conducted with the Gaussian keyword *guess=read* to achieve an unrestricted and symmetry-broken solution accordingly. The resulting structure **12** was obtained with  $\langle S^2 \rangle$  of 0.2728 before annihilation of the spin contamination, and  $\langle S^2 \rangle$  of 0.0019 after annihilation. The structure **12** can be described as closed shell with small spin polarization due to effects of the unrestricted approach. In addition, we have done additional calculations for the high-level (HL) layer of structure **12** using other functionals (Table S2). The energy ordering of the closed-shell singlet, open-shell singlet and triplet Rh–nitrene intermediate **2** obtained from these different functionals (BPW91, M06, MN15 and *w*B97xD) are the same, albeit the numbers of each structure differ. The result at the level of ONIOM(M06:UFF//BPW91:UFF) indicates that the energies of the open-shell and closed-shell are close to a degeneracy. The value of  $\langle S^2 \rangle$  in the open-shell singlet state is affected by different functionals.

**Table S1.** The energies and the  $\langle S^2 \rangle$  value of the Rh–nitrene intermediate **2** at different levels of theory. The energies are shown in kcal mol<sup>−1</sup> ( $\Delta\Delta E$ ).

| Computational Level                                              | Triplet                                   | Closed-shell singlet                      | Open-shell singlet                        |
|------------------------------------------------------------------|-------------------------------------------|-------------------------------------------|-------------------------------------------|
|                                                                  | $\Delta\Delta E$<br>$\langle S^2 \rangle$ | $\Delta\Delta E$<br>$\langle S^2 \rangle$ | $\Delta\Delta E$<br>$\langle S^2 \rangle$ |
| ONIOM(M06/def2-TZVP:UFF<br>//BPW91/6-31G*-LANL2DZ:UFF)           | 0.0<br><2.0001>                           | 9.9<br><0.0000>                           | 9.6<br><0.0019>                           |
| ONIOM(M06/def2-TZVP:UFF<br>//M06/6-31G*-LANL2DZ:UFF)             | 0.0<br><2.0005>                           | 7.0<br><0.0000>                           | 5.2<br><0.2308>                           |
| ONIOM(M06/def2-TZVP:UFF<br>//MN15/6-31G*-LANL2DZ:UFF)            | 0.0<br><2.0002>                           | 6.8<br><0.0000>                           | 5.1<br><0.0431>                           |
| ONIOM(M06/def2-TZVP:UFF<br>// <i>w</i> B97xD/6-31G*-LANL2DZ:UFF) | 0.0<br><2.0007>                           | 6.5<br><0.0000>                           | 6.0<br><0.6409>                           |

**Table S2.** Calculated spin densities of selected atoms in Rh–nitrene **2** at the level of ONIOM(M06:UFF//BPW91:UFF).

| 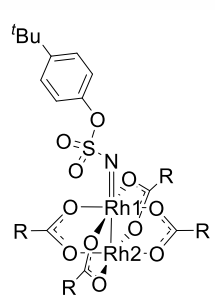 | Structure | Rh1–Rh2 | N      |
|-----------------------------------------------------------------------------------|-----------|---------|--------|
|                                                                                   | <b>12</b> | 0.040   | -0.072 |
|                                                                                   | <b>32</b> | 0.718   | 0.960  |

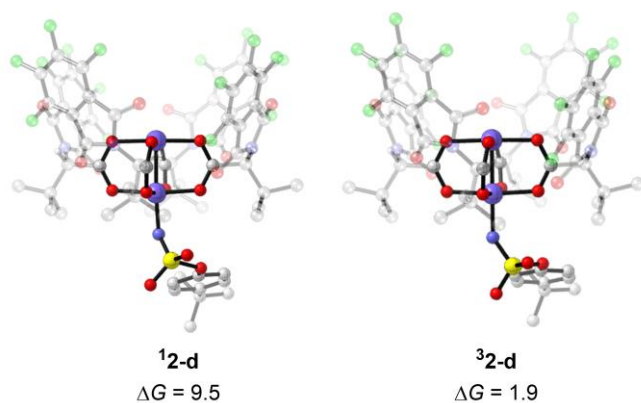

**Figure S4.** The binding of the nitrene to the *tert*-butyl face of the catalyst. Free energy obtained at the ONIOM(M06/def2-TZVP:UFF//BPW91/LANL2DZ-6-31G\*:UFF) level. Energies are shown in kcal mol<sup>-1</sup>. The H atoms of *t*Bu groups and aryl groups were omitted for clarity.

### 1.3 Singlet pathway

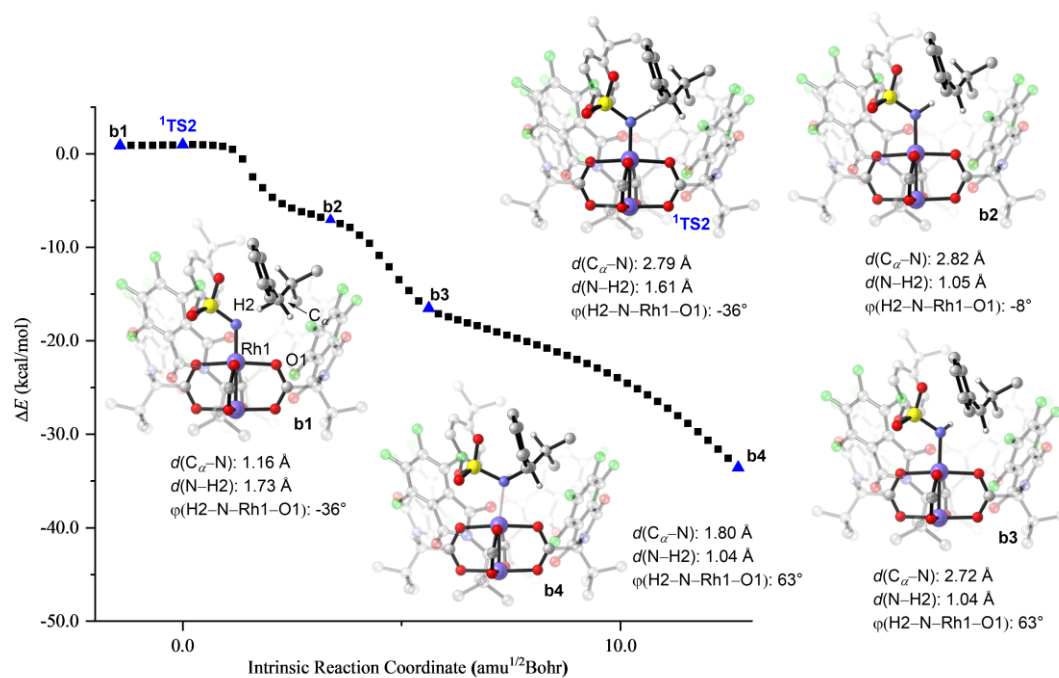

**Figure S5.** The IRC path for  $^1\text{TS2}$ . The H atoms of  $t\text{Bu}$  groups and aryl groups were omitted for clarity.

## 1.4 Triplet pathway

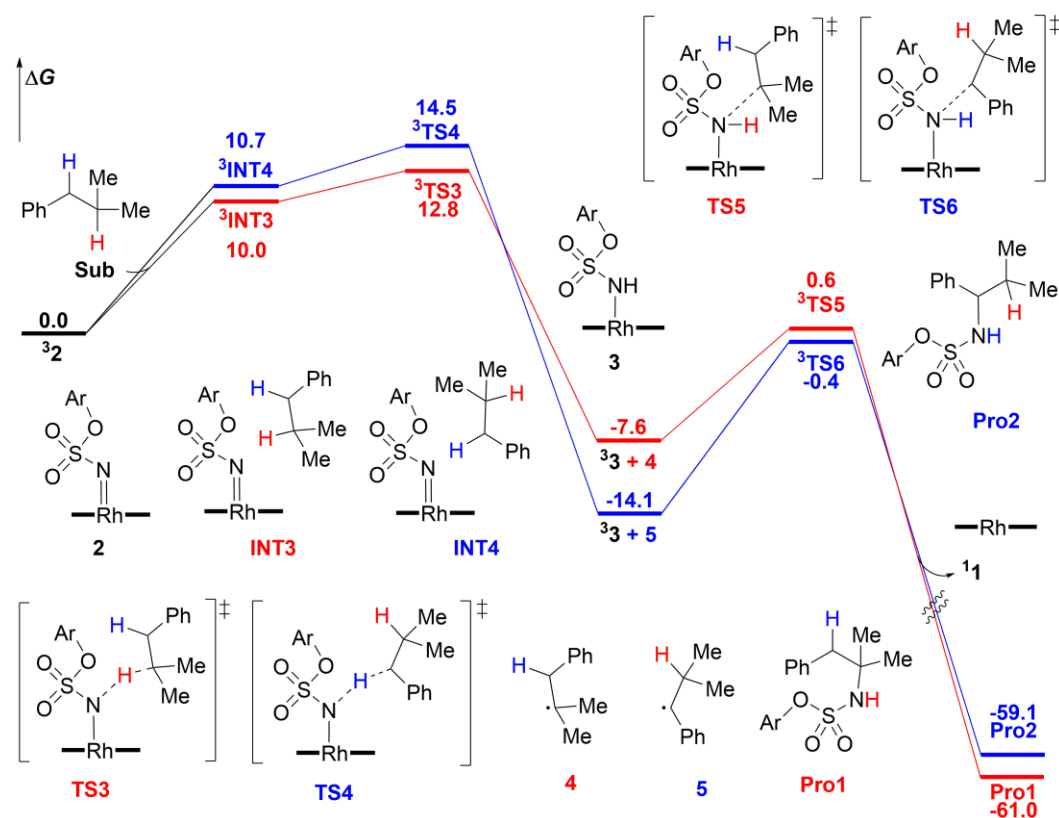

**Figure S6.** Free energy profiles of the triplet pathway. Free energy obtained at the ONIOM(M06/def2-TZVP:UFF//BPW91/LANL2DZ-6-31G\*:UFF) level. Energies are shown in kcal mol<sup>-1</sup>. Ar = *p*-tert-butylphenyl.

**Table S3.** The calculated spin densities on selected atoms in tertiary and benzylic C–H aminations at the level of ONIOM(M06:UFF//BPW91:UFF).

| Structures |                 | The Spin Density Distribution |         |                |                |                   |              |
|------------|-----------------|-------------------------------|---------|----------------|----------------|-------------------|--------------|
|            |                 | N                             | Rh1–Rh2 | C <sub>α</sub> | C <sub>β</sub> | PhCH <sub>2</sub> | Ph           |
| Tertiary   | $^3\text{INT3}$ | 0.924                         | 0.708   | 0.001          | 0.002          | 0.020             | 0.019        |
|            | $^3\text{TS3}$  | 0.702                         | 0.575   | -0.016         | 0.452          | 0.036             | 0.008        |
|            | $^3\text{INT5}$ | 0.350                         | 0.596   | -0.061         | <b>0.827</b>   | 0.023             | <b>0.007</b> |
|            | $^3\text{TS5}$  | 0.011                         | 1.412   | -0.031         | 0.389          | 0.002             | 0.000        |
| Benzylic   | $^3\text{INT4}$ | 0.899                         | 0.693   | 0.028          | 0.004          | 0.083             | 0.059        |
|            | $^3\text{TS4}$  | 0.714                         | 0.563   | 0.320          | -0.009         | -                 | 0.188        |
|            | $^3\text{INT6}$ | 0.366                         | 0.559   | <b>0.678</b>   | -0.047         | -                 | <b>0.287</b> |
|            | $^3\text{TS6}$  | 0.052                         | 1.372   | 0.274          | -0.019         | -                 | 0.113        |

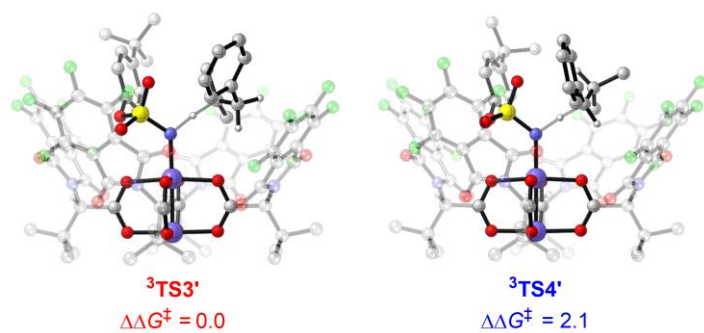

**Figure S7.** Optimized geometries of selective transition state  $^3\text{TS3'}$  and  $^3\text{TS4'}$ . Free energy obtained at the M06/def2-TZVP//BPW91/LANL2DZ-6-31G\* level. Energies are shown in kcal mol<sup>-1</sup>. The H atoms of <sup>t</sup>Bu groups and aryl groups were omitted for clarity.



## 1.5 Origins of site-selectivity

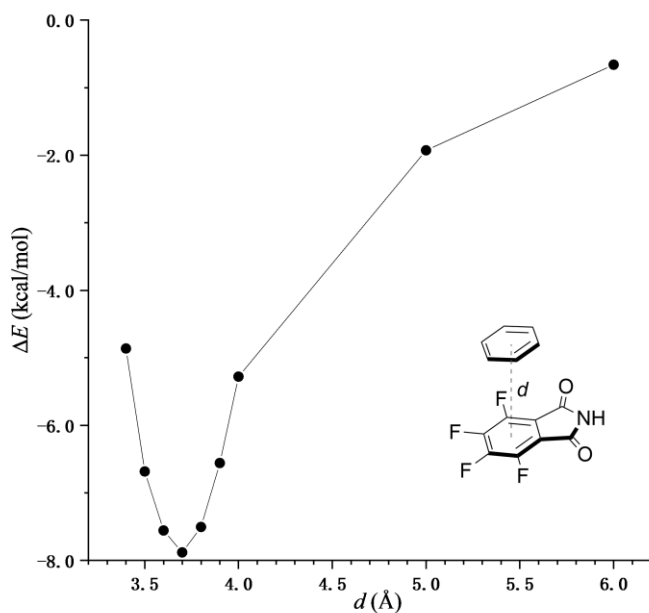

**Figure S8.** The interaction energy for the C<sub>6</sub>H<sub>6</sub>-phthalimido complex with the eclipsed face-face orientation at different distances between the centers of mass.

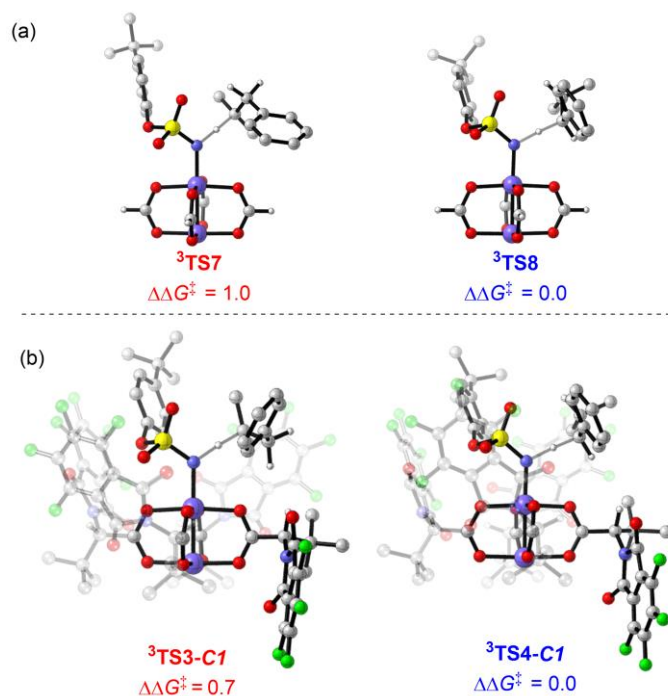

**Figure S9.** (a) The triplet transition states for Rh<sub>2</sub>(O<sub>2</sub>CH)<sub>4</sub>-catalyzed intermolecular amination of tertiary and benzylic C–H bonds. Free energy obtained at the M06/def2-TZVP//BPW91/LANL2DZ-6-31G\* level. (b) The triplet transition states for the amination of tertiary and benzylic C–H bonds with the dirhodium catalyst moiety adopting the α,α,α,β conformer. Free energy obtained at the ONIOM(M06/def2-TZVP:UFF//BPW91/LANL2DZ-6-31G\*:UFF) level. The H atoms of <sup>t</sup>Bu groups and aryl groups were omitted for clarity. The energies are shown in kcal mol<sup>–1</sup>.

## 2. Computational detail

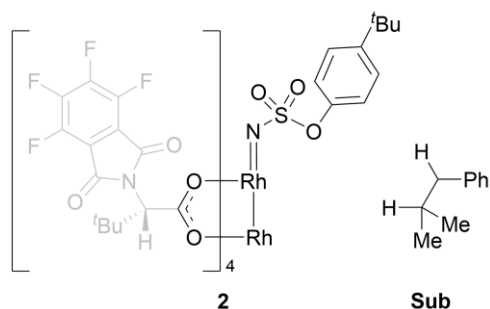

**Figure S10.** The two-layer ONIOM approach. The ligand part (gray) was calculated by the force field (UFF), and the other parts (black) were calculated by BPW91 or M06 method.

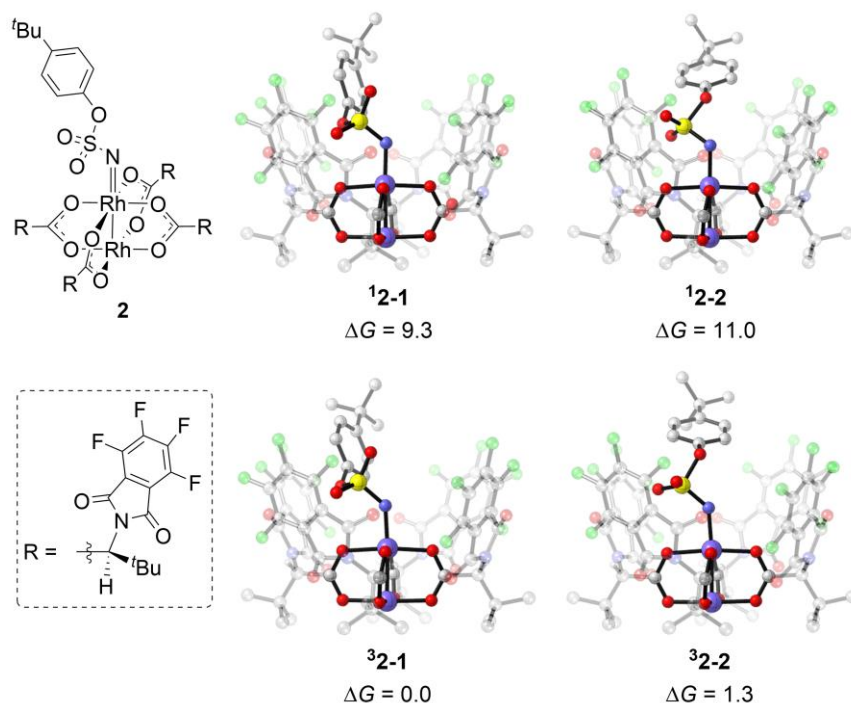

**Figure S11.** Optimized geometries and energies of conformers for  $\text{Rh}_2(\text{S-tfpttl})_4$ -nitrene **2**. Free energy obtained at the ONIOM(M06/def2-TZVP:UFF//BPW91/LANL2DZ-6-31G\*:UFF) level. The energies are shown in kcal mol<sup>-1</sup>. The H atoms of <sup>t</sup>Bu groups and aryl groups were omitted for clarity.

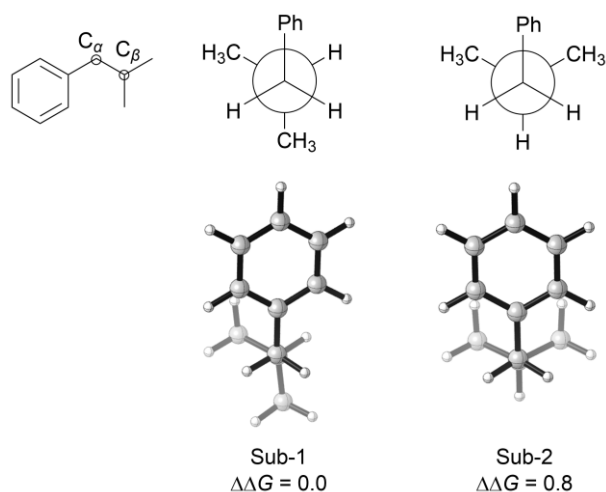

**Figure S12.** Newman projection along the C –C $_{\beta}$  bond of the substrate isobutylbenzene. Optimized geometries and energies of conformers for the substrate. The energies are shown in kcal mol<sup>-1</sup>. Free energy obtained at the M06/def2-TZVP//BPW91/LANL2DZ-6-31G\* level.

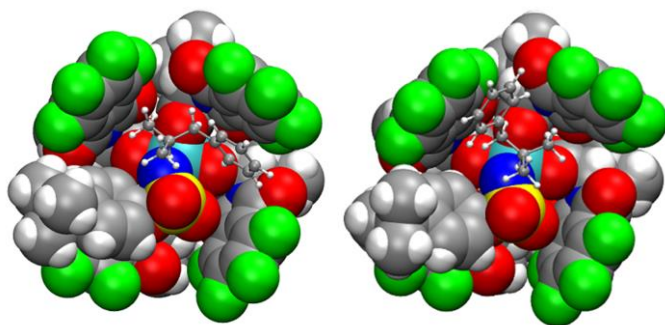

**Figure S13.** The schematic of the dirhodium–nitrene with substrate adducts displaying the substrate fitting in the catalytic pocket. The dirhodium–nitrene is represented with Van der Waals spheres mimicking the real volume of the molecule.

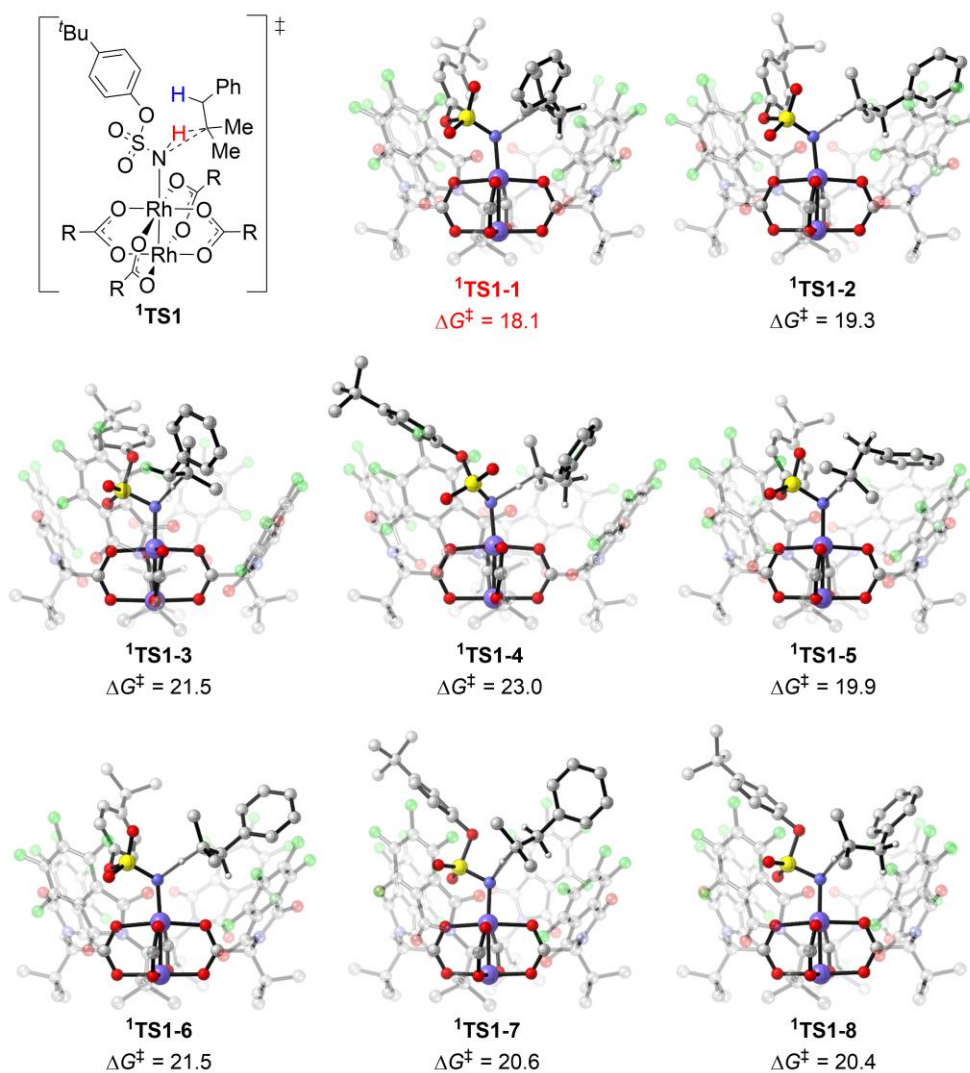

**Figure S14.** Optimized geometries and energies of conformers for **<sup>1</sup>TS1**. Free energy obtained at the ONIOM(M06/def2-TZVP:UFF//BPW91/LANL2DZ-6-31G\*:UFF) level. The energies are shown in kcal mol<sup>-1</sup>. The H atoms of tBu groups and aryl groups were omitted for clarity.

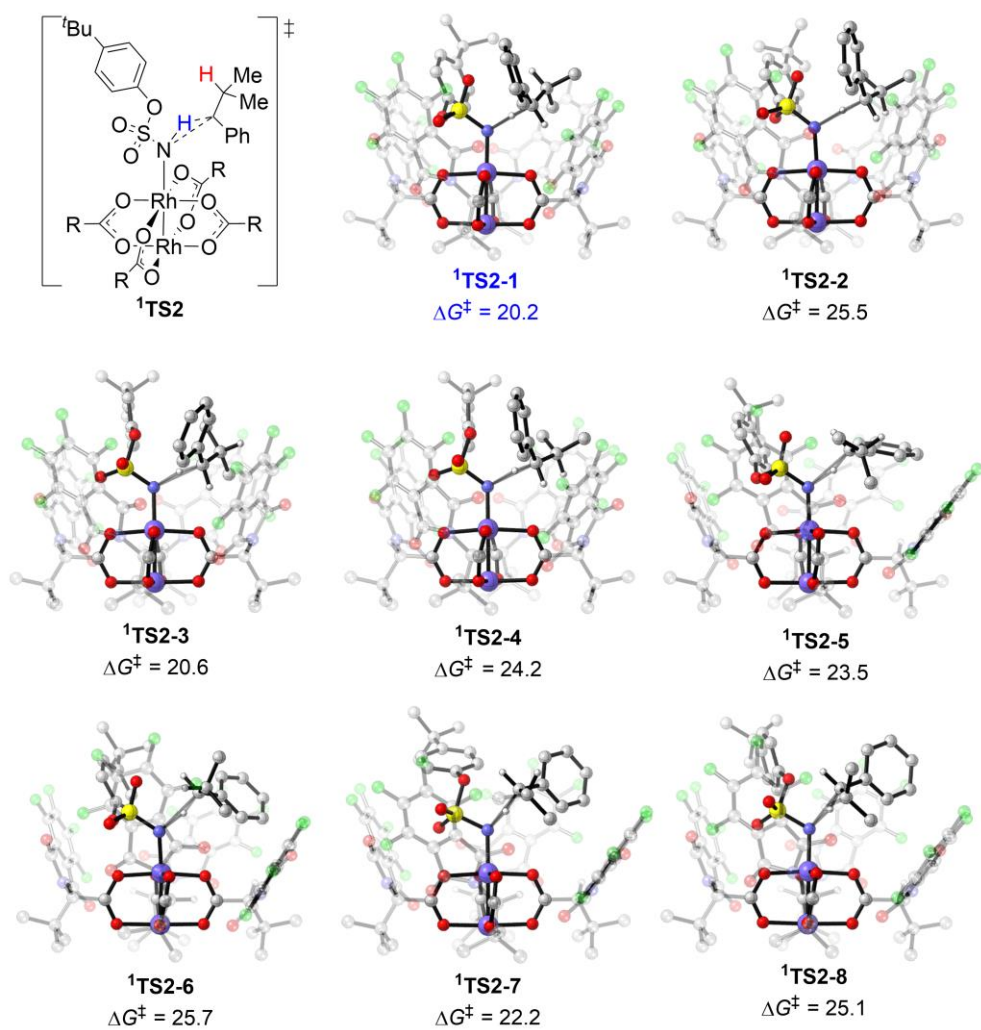

**Figure S15.** Optimized geometries and energies of conformers for **<sup>1</sup>TS2**. Free energy obtained at the ONIOM(M06/def2-TZVP:UFF//BPW91/LANL2DZ-6-31G\*:UFF) level. Energies are shown in kcal mol<sup>-1</sup>. The H atoms of <sup>t</sup>Bu groups and aryl groups were omitted for clarity.

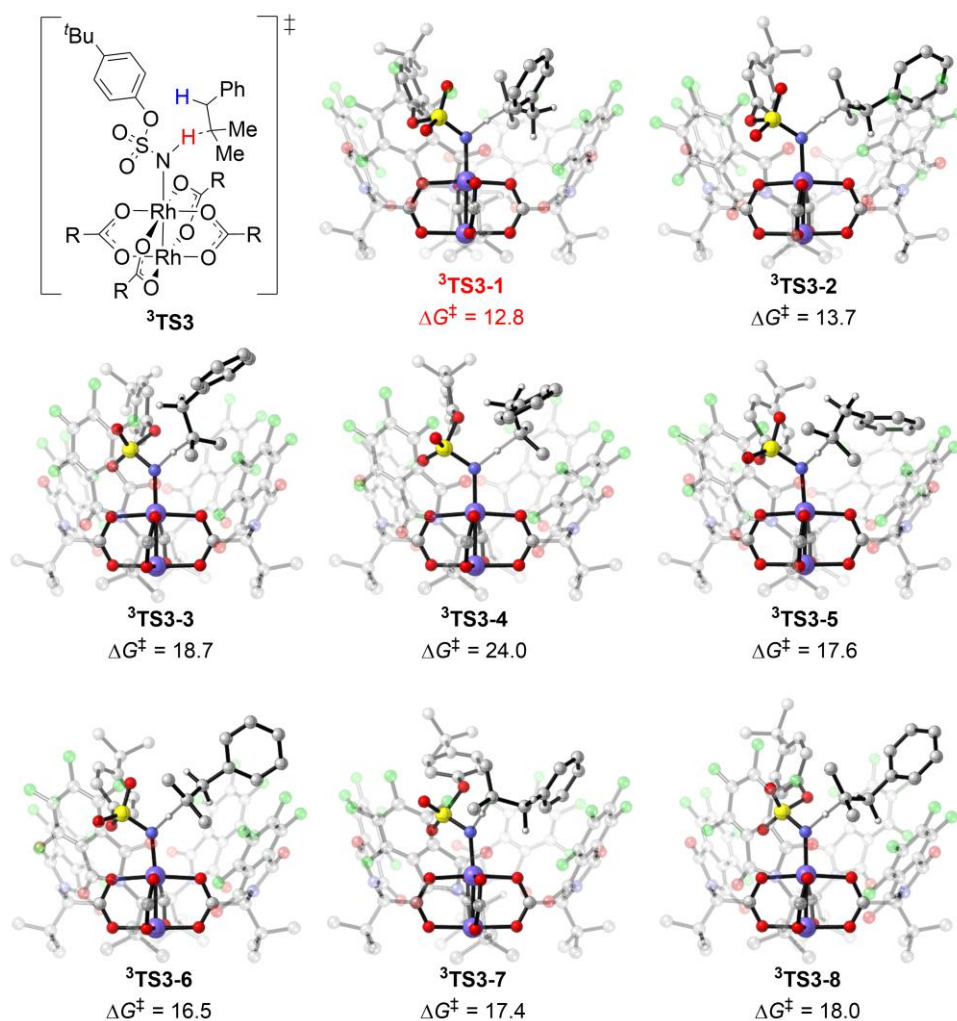

**Figure S16.** Optimized geometries and energies of conformers for  $^3\text{TS3}$ . Free energy obtained at the ONIOM(M06/def2-TZVP:UFF//BPW91/LANL2DZ-6-31G\*:UFF) level. Energies are shown in kcal mol<sup>-1</sup>. The H atoms of tBu groups and aryl groups were omitted for clarity.



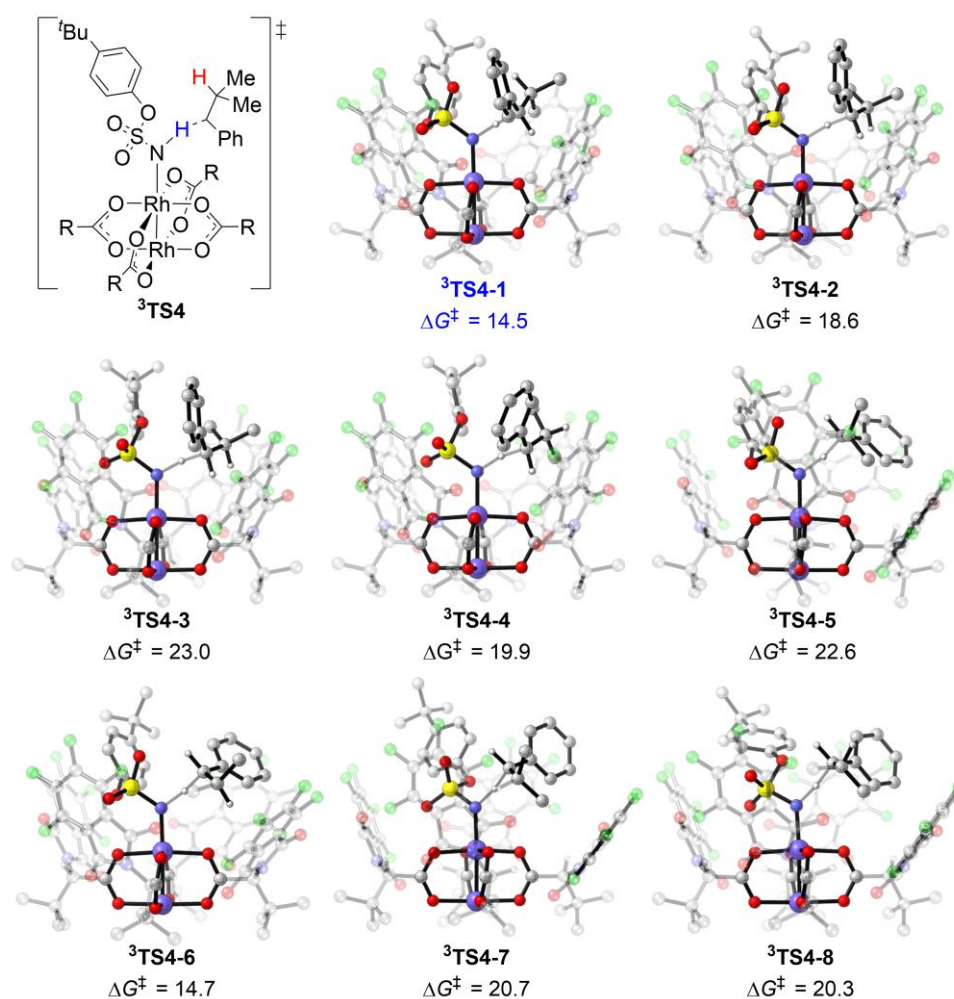

**Figure S17.** Optimized geometries and energies of conformers for **<sup>3</sup>TS4**. Free energy obtained at the ONIOM(M06/def2-TZVP:UFF//BPW91/LANL2DZ-6-31G\*:UFF) level. Energies are shown in kcal mol<sup>-1</sup>. The H atoms of <sup>t</sup>Bu groups and aryl groups were omitted for clarity.

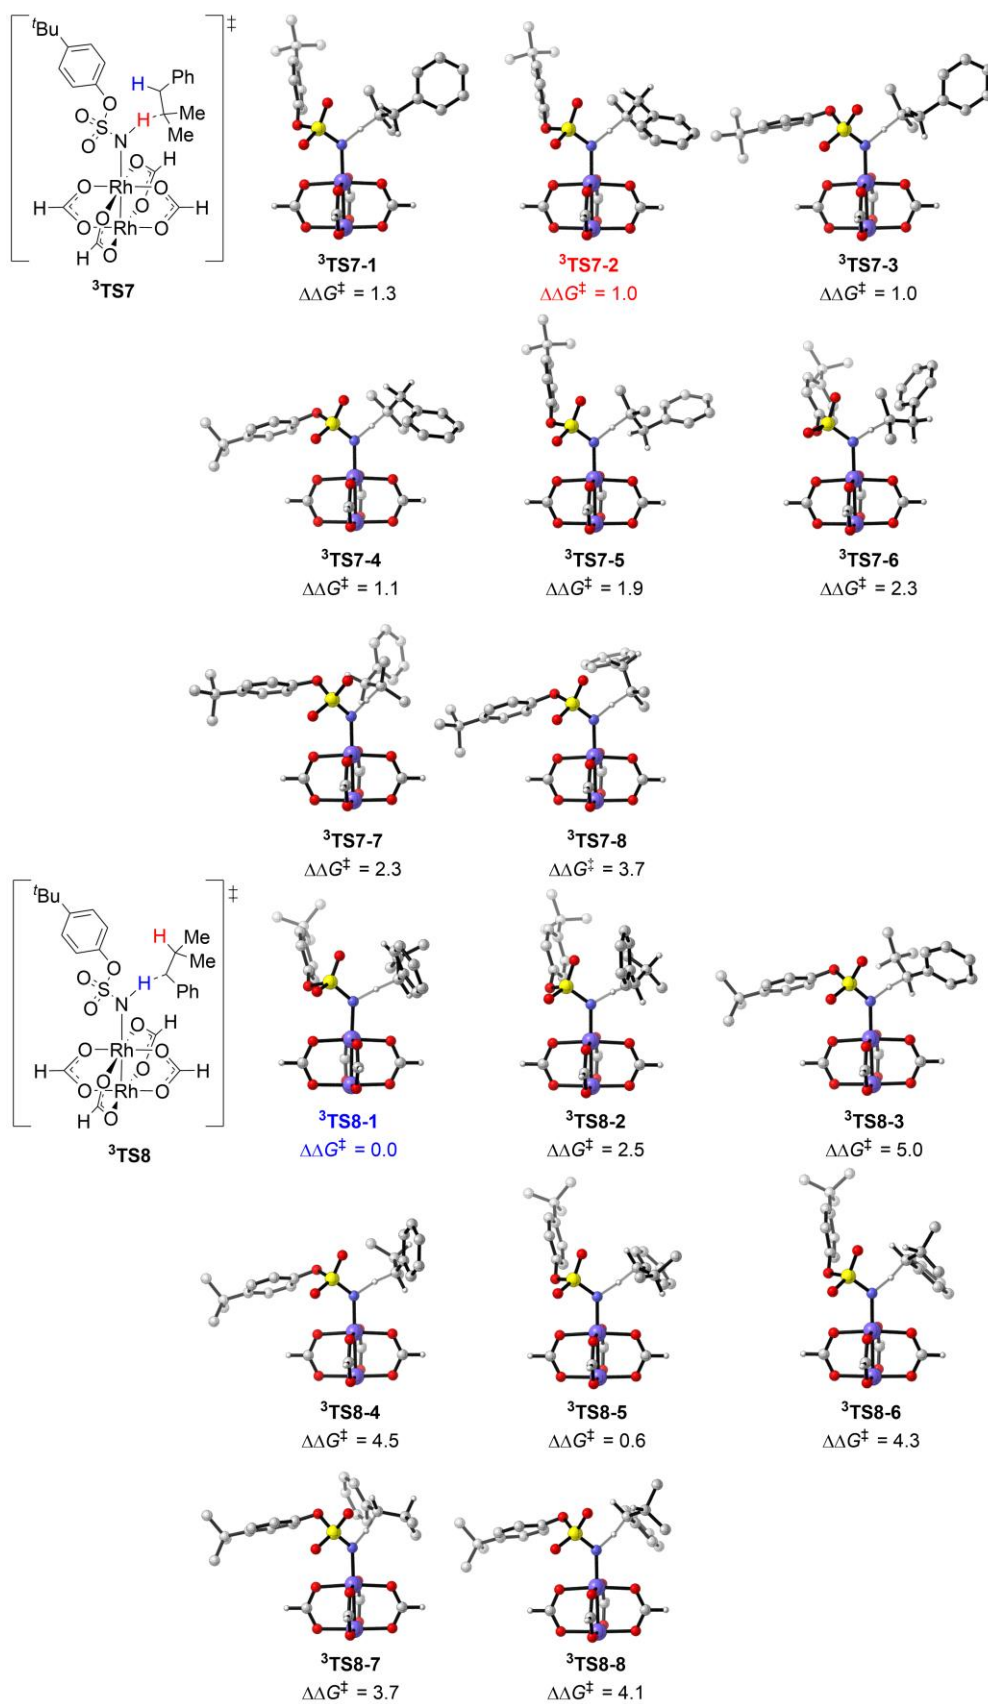

**Figure S18.** Optimized geometries and energies of conformers for **3TS7** and **3TS8**. Free energy obtained at the M06/def2-TZVP//BPW91/6-31G\*-LANL2DZ level. Energies are shown in kcal mol<sup>-1</sup>. The H atoms of <sup>t</sup>Bu groups and aryl groups were omitted for clarity.



**Table S4.** The energies of the key transition states using different functionals. The energies are shown in kcal mol<sup>-1</sup> ( $\Delta\Delta G^\ddagger$ ).

| Methods                                                  | $\Delta\Delta G^\ddagger$ <sup>a</sup> |
|----------------------------------------------------------|----------------------------------------|
| ONIOM(M06/def2-TZVP:UFF<br>//BPW91/6-31G*-LANL2DZ:UFF)   | 1.7                                    |
| ONIOM(M06/def2-TZVP:UFF<br>//M06/6-31G*-LANL2DZ:UFF)     | 4.5                                    |
| ONIOM(M06/def2-TZVP:UFF<br>//M06L-D3/6-31G*-LANL2DZ:UFF) | 3.3                                    |
| ONIOM(M06/def2-TZVP:UFF<br>//MN15/6-31G*-LANL2DZ:UFF)    | 2.1                                    |
| ONIOM(M06/def2-TZVP:UFF<br>//wB97xD/6-31G*-LANL2DZ:UFF)  | 2.3                                    |

<sup>a</sup>  $\Delta\Delta G^\ddagger = \Delta G^\ddagger_{\text{TS4}} - \Delta G^\ddagger_{\text{TS3}}$

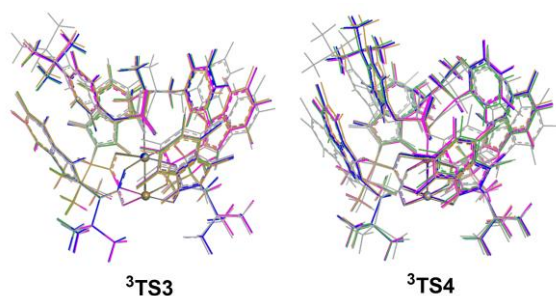

**Figure S19.** Optimized geometries of <sup>3</sup>TS3 and <sup>3</sup>TS4. The geometry optimization of the HL layer was performed using the different functional: BPW91 (in gray), M06 (in green), M06L-D3 (in blue), MN15 (in yellow), and (in pink).

### 3. Gibbs free energies of calculated structures

**Table S5.** Electronic energies and free energies (in Hartree) of the structures. Calculated at the ONIOM(M06/def2-TZVP:UFF)//ONIOM(BPW91/LANL2DZ-6-31G\*:UFF) Level of Theory.

| Structures                         | ZPVE     | TCE      | TCH      | TCG      | E <sub>gas</sub> | G <sub>gas</sub> (E <sub>gas</sub> +TCG) | Imaginary Frequency | G <sub>gas</sub><br>(kcal/mol) |
|------------------------------------|----------|----------|----------|----------|------------------|------------------------------------------|---------------------|--------------------------------|
| <b><sup>1</sup>I-1<sup>a</sup></b> | 0.894214 | 0.986519 | 0.987464 | 0.75623  | -5398.797569     | -5398.041339                             | —                   | —                              |
| <b><sup>1</sup>I-2<sup>a</sup></b> | 0.894181 | 0.98649  | 0.987434 | 0.754601 | -5398.786705     | -5398.032104                             | —                   | —                              |
| <b><sup>1</sup>I-3<sup>a</sup></b> | 0.894187 | 0.986531 | 0.987476 | 0.75545  | -5398.786705     | -5398.031255                             | —                   | —                              |
| <b><sup>1</sup>I-4<sup>a</sup></b> | 0.893878 | 0.986333 | 0.987277 | 0.75197  | -5398.775497     | -5398.023527                             | —                   | —                              |
| <b><sup>1</sup>I</b>               | 1.002308 | 1.079837 | 1.080782 | 0.888513 | -977.8683429     | -976.9798299                             | —                   | —                              |
| <b>sub<sup>a</sup></b>             | 0.208972 | 0.219148 | 0.220092 | 0.173041 | -389.3207502     | -389.1477092                             | —                   | —                              |
| <b><sup>1</sup>2</b>               | 1.208686 | 1.305487 | 1.306431 | 1.068665 | -2045.071219     | -2044.002554                             | —                   | 9.3                            |
| <b><sup>3</sup>2</b>               | 1.209174 | 1.305688 | 1.306632 | 1.069031 | -2045.086477     | -2044.017446                             | —                   | 0.0                            |
| <b><sup>1</sup>INT1</b>            | 1.41776  | 1.52718  | 1.52812  | 1.26272  | -2434.400419     | -2433.137699                             | —                   | 17.2                           |
| <b><sup>1</sup>TS1</b>             | 1.41513  | 1.522833 | 1.523777 | 1.265236 | -2434.401473     | -2433.136237                             | 219.34 <i>i</i>     | 18.1                           |
| <b><sup>1</sup>INT2</b>            | 1.418077 | 1.527185 | 1.528129 | 1.265146 | -2434.404217     | -2433.139071                             | —                   | 16.4                           |
| <b><sup>3</sup>TS2</b>             | 1.416598 | 1.524228 | 1.525172 | 1.267428 | -2434.400364     | -2433.132936                             | 75.61 <i>i</i>      | 20.2                           |
| <b><sup>3</sup>INT3</b>            | 1.418362 | 1.527529 | 1.528473 | 1.262134 | -2434.411415     | -2433.149281                             | —                   | 10.0                           |
| <b><sup>3</sup>TS3</b>             | 1.413047 | 1.521227 | 1.522171 | 1.261212 | -2434.406012     | -2433.1448                               | 1161.60 <i>i</i>    | 12.8                           |
| <b><sup>3</sup>INT4</b>            | 1.418103 | 1.527187 | 1.528132 | 1.263066 | -2434.41118      | -2433.148114                             | —                   | 10.7                           |
| <b><sup>3</sup>TS4</b>             | 1.41387  | 1.521866 | 1.52281  | 1.262522 | -2434.40457      | -2433.142048                             | 997.54 <i>i</i>     | 14.5                           |
| <b><sup>3</sup>INT5</b>            | 1.416554 | 1.525723 | 1.526667 | 1.262432 | -2434.427453     | -2433.165021                             | —                   | 0.1                            |
| <b><sup>3</sup>TS5</b>             | 1.416999 | 1.525384 | 1.526328 | 1.265082 | -2434.429218     | -2433.164136                             | 206.02 <i>i</i>     | 0.6                            |
| <b><sup>3</sup>INT6</b>            | 1.417638 | 1.526616 | 1.52756  | 1.262959 | -2434.435401     | -2433.172442                             | —                   | -4.6                           |
| <b><sup>3</sup>TS6</b>             | 1.417834 | 1.526425 | 1.527369 | 1.265186 | -2434.430965     | -2433.165779                             | 240.32 <i>i</i>     | -0.4                           |
| <b>Pro1<sup>a</sup></b>            | 0.428276 | 0.454255 | 0.455200 | 0.370183 | -1456.632071     | -1456.261888                             | —                   | -59.1                          |
| <b>Pro2<sup>a</sup></b>            | 0.428359 | 0.454582 | 0.455526 | 0.369437 | -1456.62817      | -1456.258733                             | —                   | -61.0                          |

ZPVE = zero-point vibrational energy; TCE = thermal correction to energy; TCH = thermal correction to enthalpy; TCG = thermal correction to Gibbs free energy.

<sup>a</sup>Calculated at the M06/def2-TZVP//BPW91/LANL2DZ-6-31G\* Level of Theory.

#### 4. Cartesian coordinates of the structures

M06/def2-TZVP//BPW91/LANL2DZ-6-31G\*

**<sup>1</sup>1-1**

|   |             |             |             |
|---|-------------|-------------|-------------|
| C | 5.63807800  | 2.54911400  | 1.50234200  |
| C | -4.30307300 | -4.71383900 | 2.78349300  |
| C | -4.71722900 | 4.29756400  | 2.78482700  |
| C | 2.55483400  | -5.63483700 | 1.50739200  |
| C | 2.12776100  | 4.55764400  | -2.80629900 |
| C | -4.55879700 | 2.12756300  | -2.80565600 |
| C | -2.12839000 | -4.55874400 | -2.80523600 |
| C | 4.55790800  | -2.12719100 | -2.80659200 |
| C | -4.79135500 | 0.84431700  | -3.64049700 |
| C | 2.70242600  | 5.94251300  | -2.41962000 |
| C | 5.94272200  | -2.70209600 | -2.42006600 |
| C | -3.17273500 | -3.79829800 | -3.64984000 |
| C | 3.17307500  | 3.79758800  | -3.65003800 |
| C | 3.79740800  | -3.17247900 | -3.64996400 |
| C | -3.79827100 | 3.17232900  | -3.64965600 |
| C | -2.70435600 | -5.94295400 | -2.41818800 |
| C | -5.94324200 | 2.70307100  | -2.41870400 |
| C | 4.78967500  | -0.84401300 | -3.64179000 |
| C | -0.84473900 | -4.79182000 | -3.63931800 |
| C | 0.84434200  | 4.78917700  | -3.64115300 |
| C | -1.13502700 | -2.39122200 | -1.56115400 |
| C | 2.39069800  | -1.13437400 | -1.56159400 |
| C | 1.13412300  | 2.39057900  | -1.56166200 |
| C | -2.39144800 | 1.13407200  | -1.56133200 |
| C | -1.73034500 | -3.81878400 | -1.47820400 |
| C | 3.81872100  | -1.72856400 | -1.47930400 |
| C | 1.72956200  | 3.81808800  | -1.47913400 |
| C | -3.81918200 | 1.72893400  | -1.47861800 |
| C | -3.80644200 | -2.84104400 | -0.34849400 |
| C | 4.62997000  | -2.70152700 | 0.70248100  |
| C | 2.70530900  | 4.62702300  | 0.70236200  |
| C | -2.84218600 | 3.80403800  | -0.34634200 |
| C | -4.52231800 | -3.14707600 | 0.92789100  |
| C | 4.22450900  | -3.85579700 | 1.56149700  |
| C | 3.86029500  | 4.22008900  | 1.55975200  |
| C | -3.14919400 | 4.51869400  | 0.93051000  |
| C | -3.86114900 | -4.22017100 | 1.56074400  |

|   |             |             |             |
|---|-------------|-------------|-------------|
| C | 3.15132500  | -4.51853100 | 0.93037800  |
| C | 4.52136500  | 3.14673300  | 0.92723700  |
| C | -4.22268400 | 3.85685100  | 1.56199200  |
| C | -2.70616500 | -4.62732500 | 0.70345000  |
| C | 2.84357900  | -3.80437600 | -0.34661400 |
| C | 3.80534100  | 2.84022700  | -0.34896200 |
| C | -4.62907300 | 2.70261400  | 0.70335500  |
| C | -5.63907800 | -2.54936600 | 1.50279800  |
| C | 4.71948500  | -4.29569900 | 2.78444000  |
| C | 4.30228500  | 4.71414700  | 2.78232100  |
| C | -2.55188200 | 5.63485800  | 1.50697500  |
| C | -6.09505800 | -3.04618700 | 2.74403200  |
| C | 4.12015100  | -5.42816500 | 3.37822300  |
| C | 5.43511100  | 4.11364800  | 3.37422500  |
| C | -3.04959200 | 6.08962000  | 2.74828600  |
| C | -5.43593600 | -4.11322900 | 3.37522000  |
| C | 3.05301300  | -6.08880300 | 2.74881600  |
| C | 6.09412600  | 3.04635100  | 2.74338500  |
| C | -4.11705400 | 5.42986500  | 3.37809000  |
| F | -6.29727800 | -1.53366300 | 0.93436700  |
| F | 5.73433600  | -3.69665700 | 3.42078600  |
| F | 3.70489400  | 5.72912800  | 3.42000500  |
| F | -1.53575900 | 6.29362500  | 0.93995200  |
| F | -7.16838000 | -2.49986200 | 3.33100000  |
| F | 4.57024700  | -5.88309000 | 4.55620600  |
| F | 5.89200700  | 4.56281000  | 4.55180200  |
| F | -2.50366600 | 7.16235900  | 3.33669100  |
| F | -5.89275200 | -4.56201500 | 4.55297200  |
| F | 2.50781800  | -7.16167900 | 3.33766600  |
| F | 7.16743000  | 2.50015800  | 3.33051000  |
| F | -4.56667700 | 5.88552800  | 4.55597400  |
| F | -3.70560500 | -5.72855500 | 3.42151500  |
| F | 1.53901900  | -6.29450100 | 0.94084400  |
| F | 6.29623100  | 1.53321900  | 0.93423700  |
| F | -5.73236800 | 3.69942000  | 3.42155800  |
| H | 6.52648800  | -2.89664700 | -3.33484700 |
| H | -3.38858900 | -4.37558700 | -4.56517400 |
| H | -5.40787100 | 1.08899900  | -4.52169500 |
| H | 2.89686600  | 6.52643300  | -3.33433000 |
| H | 5.85422200  | -3.65674200 | -1.87611100 |
| H | 3.65712000  | 5.85411200  | -1.87572900 |
| H | -2.80739100 | -2.80576000 | -3.94766100 |
| H | -5.32495900 | 0.07508000  | -3.05792900 |
| H | 6.51723000  | -2.00170800 | -1.79195600 |

|   |             |             |             |
|---|-------------|-------------|-------------|
| H | 2.00198500  | 6.51682400  | -1.79139200 |
| H | -4.12122000 | -3.66409800 | -3.10804900 |
| H | -3.84572500 | 0.41126700  | -3.99356400 |
| H | 4.37417000  | -3.38861800 | -4.56555900 |
| H | 3.38891900  | 4.37461900  | -4.56553700 |
| H | -4.37520100 | 3.38820300  | -4.56521400 |
| H | -2.89885900 | -6.52710500 | -3.33273700 |
| H | 2.80451700  | -2.80772900 | -3.94738800 |
| H | 2.80857600  | 2.80464700  | -3.94756500 |
| H | -2.80551100 | 2.80728200  | -3.94713300 |
| H | -3.65922000 | -5.85353300 | -1.87476400 |
| H | 3.66392000  | -4.12063000 | -3.10744900 |
| H | 4.12138700  | 3.66431500  | -3.10772100 |
| H | -3.66453400 | 4.12071300  | -3.10760200 |
| H | -2.00467300 | -6.51754200 | -1.78938100 |
| H | 1.08856700  | 5.40563200  | -4.52252200 |
| H | 5.40560100  | -1.08869900 | -4.52340200 |
| H | -6.52724000 | 2.89785400  | -3.33329200 |
| H | -1.08902400 | -5.40861500 | -4.52043100 |
| H | 0.07478300  | 5.32244000  | -3.05869300 |
| H | 5.32363200  | -0.07465300 | -3.05968800 |
| H | -0.07594200 | -5.32542600 | -3.05614100 |
| H | -5.85416700 | 3.65770800  | -1.87482600 |
| H | 0.41189400  | 3.84318100  | -3.99398100 |
| H | -6.51783900 | 2.00296500  | -1.79035800 |
| H | -0.41129700 | -3.84641900 | -3.99250800 |
| H | 3.84373700  | -0.41114000 | -3.99423100 |
| H | -0.92560600 | -4.42016600 | -1.01493900 |
| H | 4.41990800  | -0.92288100 | -1.01738500 |
| H | 0.92483500  | 4.41969900  | -1.01613300 |
| H | -4.42051900 | 0.92364000  | -1.01623900 |
| N | -2.78026200 | -3.80370500 | -0.44806700 |
| N | 3.80543000  | -2.77756900 | -0.44821500 |
| N | 2.77940700  | 3.80314000  | -0.44893900 |
| N | -3.80488100 | 2.77803300  | -0.44765100 |
| O | -0.91064800 | -1.85065200 | -0.41877400 |
| O | 1.85020000  | -0.91041400 | -0.41908900 |
| O | 0.91010500  | 1.85017500  | -0.41911300 |
| O | -1.85084300 | 0.90992800  | -0.41888600 |
| O | -0.86169000 | -1.88573400 | -2.70337100 |
| O | 1.88491800  | -0.86098600 | -2.70367300 |
| O | 0.86048700  | 1.88486900  | -2.70370700 |
| O | -1.88595500 | 0.86054500  | -2.70347900 |
| O | -4.02513300 | -1.94342900 | -1.15327300 |

|    |             |             |             |
|----|-------------|-------------|-------------|
| O  | 5.47765500  | -1.84489600 | 0.91043500  |
| O  | 1.84977800  | 5.47547700  | 0.91165400  |
| O  | -1.94376600 | 4.02337600  | -1.15003800 |
| O  | -1.85054300 | -5.47559800 | 0.91302100  |
| O  | 1.94519700  | -4.02449600 | -1.15011000 |
| O  | 4.02361600  | 1.94204800  | -1.15321900 |
| O  | -5.47738400 | 1.84667300  | 0.91154600  |
| Rh | -0.00033200 | -0.00022800 | -0.37039100 |
| Rh | -0.00058900 | -0.00037400 | -2.75622500 |

## <sup>1</sup>1-2

|   |             |             |             |
|---|-------------|-------------|-------------|
| C | 1.46716400  | 6.28129500  | 1.17167800  |
| C | 4.94605000  | -5.11363500 | 1.95302100  |
| C | -8.11723600 | -0.26409400 | 0.07246100  |
| C | 6.41056900  | -0.37175000 | -1.54746300 |
| C | -3.75676100 | 3.99703300  | -0.37772300 |
| C | -3.46779300 | -3.21454100 | 2.61281300  |
| C | 1.07394400  | -4.53265000 | -2.57075100 |
| C | 1.99916800  | 2.57735000  | -4.05385200 |
| C | -2.35125500 | -2.95491200 | 3.65474300  |
| C | -4.33602400 | 5.25061500  | 0.32242600  |
| C | 3.14123100  | 3.53501600  | -4.47425000 |
| C | -0.29908700 | -5.11476500 | -2.17271100 |
| C | -3.22597100 | 4.39796700  | -1.77026000 |
| C | 2.03566100  | 1.32583100  | -4.95685900 |
| C | -3.10695600 | -4.47409900 | 1.79847100  |
| C | 2.09432100  | -5.68859500 | -2.71022000 |
| C | -4.79501200 | -3.45052400 | 3.37339000  |
| C | 0.65675100  | 3.32487400  | -4.24635700 |
| C | 0.97041600  | -3.82808700 | -3.94645700 |
| C | -4.89949500 | 2.96263700  | -0.52735700 |
| C | 0.74364300  | -2.31624600 | -1.10108900 |
| C | 1.17255900  | 1.31303800  | -1.82954500 |
| C | -1.89815200 | 2.11384800  | 0.11093700  |
| C | -2.46891300 | -1.41524500 | 0.88096200  |
| C | 1.64322100  | -3.50453700 | -1.51989500 |
| C | 2.17858500  | 2.26337900  | -2.52387100 |
| C | -2.65801400 | 3.38720300  | 0.56468100  |
| C | -3.65779600 | -1.91107300 | 1.73834200  |
| C | 1.48806000  | -4.49983700 | 0.83721200  |
| C | 4.41843000  | 2.72390400  | -1.46045100 |
| C | -1.68811100 | 4.82786800  | 2.39167800  |
| C | -5.25824900 | -2.58432700 | -0.20574400 |
| C | 2.51585700  | -4.94917700 | 1.82854900  |

|   |              |             |             |
|---|--------------|-------------|-------------|
| C | 5.64459600   | 1.91585800  | -1.18339400 |
| C | -0.45802300  | 5.66285500  | 2.53855200  |
| C | -6.57425300  | -2.01385000 | -0.64295500 |
| C | 3.79124900   | -4.78092500 | 1.25266200  |
| C | 5.42490500   | 0.60437500  | -1.65448400 |
| C | 0.26513100   | 5.59891700  | 1.32883700  |
| C | -6.93291100  | -0.97547000 | 0.23810400  |
| C | 3.61176800   | -4.21538400 | -0.11921200 |
| C | 4.04291400   | 0.53568400  | -2.22474300 |
| C | -0.48155200  | 4.71748800  | 0.38031700  |
| C | -5.85101600  | -0.83933400 | 1.25447400  |
| C | 2.37103700   | -5.45404200 | 3.11627400  |
| C | 6.84809000   | 2.27258000  | -0.58481200 |
| C | 0.01060000   | 6.40651100  | 3.61635400  |
| C | -7.39705500  | -2.36486100 | -1.70822400 |
| C | 3.53777500   | -5.79558800 | 3.83458000  |
| C | 7.85123500   | 1.28617900  | -0.46436800 |
| C | 1.23151500   | 7.10057600  | 3.46690800  |
| C | -8.60155100  | -1.64930700 | -1.88499000 |
| C | 4.80818200   | -5.62789200 | 3.26063000  |
| C | 7.63635400   | -0.01657900 | -0.94102700 |
| C | 1.94940400   | 7.03951700  | 2.26182200  |
| C | -8.95773600  | -0.61359600 | -1.00600200 |
| F | 1.18030300   | -5.62941500 | 3.70370700  |
| F | 7.09755500   | 3.50443900  | -0.12187200 |
| F | -0.64113900  | 6.49411300  | 4.78238800  |
| F | -7.09947000  | -3.34330900 | -2.57239400 |
| F | 3.43952500   | -6.28546100 | 5.07841600  |
| F | 9.02541600   | 1.59143400  | 0.10624500  |
| F | 1.71549300   | 7.82886400  | 4.48263000  |
| F | -9.42002500  | -1.95631000 | -2.90131000 |
| F | 5.89711700   | -5.96065500 | 3.96818300  |
| F | 8.61137100   | -0.92775800 | -0.81931100 |
| F | 3.10238500   | 7.71250100  | 2.15133800  |
| F | -10.10817400 | 0.04669300  | -1.20143700 |
| F | 6.17679500   | -4.96791100 | 1.44525900  |
| F | 6.25540200   | -1.61965200 | -1.99799700 |
| F | 2.17898200   | 6.25454500  | 0.04074900  |
| F | -8.49232400  | 0.73126900  | 0.88635600  |
| H | 2.98353900   | 3.85635200  | -5.51699800 |
| H | -0.63209300  | -5.82509100 | -2.94847000 |
| H | -2.32300100  | -3.79903300 | 4.36404900  |
| H | -5.17929400  | 5.64348600  | -0.26909300 |
| H | 4.12776000   | 3.04557500  | -4.42649600 |

|   |             |             |             |
|---|-------------|-------------|-------------|
| H | -3.58825600 | 6.05600100  | 0.40575100  |
| H | -1.06389000 | -4.33043600 | -2.08115100 |
| H | -2.53310600 | -2.03322000 | 4.23329300  |
| H | 3.17468400  | 4.43699700  | -3.84142200 |
| H | -4.70755800 | 5.02183300  | 1.33470300  |
| H | -0.25297700 | -5.65781000 | -1.21699500 |
| H | -1.36197000 | -2.87797700 | 3.18275000  |
| H | 1.88626500  | 1.63291200  | -6.00624400 |
| H | -4.05649100 | 4.80546500  | -2.37174000 |
| H | -2.96244100 | -5.31881300 | 2.49405400  |
| H | 1.77263200  | -6.36121600 | -3.52223800 |
| H | 1.24385200  | 0.61164800  | -4.69190000 |
| H | -2.80288100 | 3.53708300  | -2.30597700 |
| H | -2.16860000 | -4.34404300 | 1.24197600  |
| H | 2.16243500  | -6.29254400 | -1.79077400 |
| H | 3.00141400  | 0.80187100  | -4.89696000 |
| H | -2.44882200 | 5.17425500  | -1.70466400 |
| H | -3.89436400 | -4.74893500 | 1.08446300  |
| H | 3.10320400  | -5.31823600 | -2.95542000 |
| H | -5.73148300 | 3.41693100  | -1.09095800 |
| H | 0.56860300  | 3.65062400  | -5.29641400 |
| H | -4.67107500 | -4.29549300 | 4.07044600  |
| H | 0.65895200  | -4.56151200 | -4.70899800 |
| H | -5.29461100 | 2.64915000  | 0.45420600  |
| H | 0.59923900  | 4.22167000  | -3.60784700 |
| H | 1.94368300  | -3.41253800 | -4.25909300 |
| H | -5.62237500 | -3.70429700 | 2.69129300  |
| H | -4.56689400 | 2.06795100  | -1.07172500 |
| H | -5.09317100 | -2.56694700 | 3.96312700  |
| H | 0.23459600  | -3.01319800 | -3.93418300 |
| H | -0.20376200 | 2.68305700  | -4.01391200 |
| H | 2.52039500  | -3.02413500 | -1.99563700 |
| H | 2.04565400  | 3.22420800  | -1.99188900 |
| H | -3.18282100 | 3.08128300  | 1.48997800  |
| H | -3.80105800 | -1.09618800 | 2.47202400  |
| N | 2.21155900  | -4.11870800 | -0.31214100 |
| N | 3.53599400  | 1.84962100  | -2.14243200 |
| N | -1.66482500 | 4.35258500  | 1.05480700  |
| N | -4.90264800 | -1.85150600 | 0.95799200  |
| O | 1.08167600  | -1.71727400 | -0.01838000 |
| O | 1.41915100  | 1.09685800  | -0.58770800 |
| O | -0.99361300 | 1.72270500  | 0.93245900  |
| O | -1.40863100 | -1.08257100 | 1.52014300  |
| O | -0.20233400 | -1.96798900 | -1.88972800 |



|    |             |             |             |
|----|-------------|-------------|-------------|
| O  | 0.16604000  | 0.87673800  | -2.48595200 |
| O  | -2.24631100 | 1.52147500  | -0.96826900 |
| O  | -2.66790800 | -1.26818600 | -0.37632500 |
| O  | 0.27395400  | -4.44810300 | 0.97166000  |
| O  | 4.18235500  | 3.89032300  | -1.17824100 |
| O  | -2.55584300 | 4.57401800  | 3.21475100  |
| O  | -4.63080100 | -3.48978400 | -0.73063000 |
| O  | 4.46380900  | -3.88733100 | -0.93281700 |
| O  | 3.43979200  | -0.43529300 | -2.66482700 |
| O  | -0.16237500 | 4.35485400  | -0.74583800 |
| O  | -5.75328000 | -0.02580800 | 2.16601400  |
| Rh | 0.05630900  | -0.00882100 | 0.50369500  |
| Rh | -1.25878900 | -0.23480100 | -1.47419300 |

### **<sup>1</sup>1-3**

|   |             |             |             |
|---|-------------|-------------|-------------|
| C | -6.87710000 | 1.95180900  | -0.69164000 |
| C | 7.20049000  | -2.84193200 | 0.80893400  |
| C | -6.95266200 | -3.00861700 | 0.76526000  |
| C | 6.60358400  | 2.68791300  | -1.31055600 |
| C | -3.21288600 | 1.44012600  | 3.89848400  |
| C | -1.18956400 | -4.91081500 | 0.38911100  |
| C | 3.20035300  | -1.70409200 | -3.56744000 |
| C | 1.21325800  | 4.94644500  | -1.00767800 |
| C | -0.09780500 | -5.12405800 | 1.46541500  |
| C | -4.49442200 | 2.14962600  | 4.39449100  |
| C | 1.94369900  | 6.28488400  | -0.73833700 |
| C | 2.20171800  | -2.85986200 | -3.78776000 |
| C | -3.41627800 | -0.08865800 | 3.94779400  |
| C | 1.34024100  | 4.60183300  | -2.50718000 |
| C | -0.52904300 | -4.89325000 | -1.00405800 |
| C | 4.59909900  | -2.12800500 | -4.07713600 |
| C | -2.20336600 | -6.07393000 | 0.48072800  |
| C | -0.27766600 | 5.12743500  | -0.63205200 |
| C | 2.75084100  | -0.46847200 | -4.38769600 |
| C | -2.05055100 | 1.83691200  | 4.84308800  |
| C | 2.07420100  | -0.93692100 | -1.24916500 |
| C | 1.20742200  | 2.44298800  | -0.04326400 |
| C | -1.83791300 | 1.18800800  | 1.62246100  |
| C | -1.15413600 | -2.27223400 | 0.47065900  |
| C | 3.34930300  | -1.27123800 | -2.05900500 |
| C | 1.82565500  | 3.86555700  | -0.04745100 |
| C | -2.87416800 | 1.98211400  | 2.44929200  |
| C | -1.95002400 | -3.56654600 | 0.73722700  |
| C | 3.86446800  | -3.36825800 | -0.66526200 |

|   |             |             |             |
|---|-------------|-------------|-------------|
| C | 4.12661400  | 4.28561700  | 0.89573200  |
| C | -4.26205300 | 3.66709800  | 1.23755900  |
| C | -3.79331400 | -3.37061700 | -1.10968300 |
| C | 5.03405000  | -3.76851200 | 0.17872900  |
| C | 5.51781200  | 3.91617600  | 0.49770900  |
| C | -5.42694500 | 3.63481900  | 0.30637200  |
| C | -5.27515300 | -3.17674600 | -0.99722900 |
| C | 6.00098400  | -2.74565200 | 0.11139100  |
| C | 5.45042400  | 3.14903300  | -0.68465800 |
| C | -5.81044300 | 2.28949800  | 0.13377400  |
| C | -5.63074800 | -3.16980900 | 0.36440500  |
| C | 5.47148400  | -1.66505600 | -0.77259300 |
| C | 4.01196600  | 2.97507800  | -1.05082800 |
| C | -4.90640500 | 1.42550900  | 0.95979300  |
| C | -4.38774600 | -3.33884900 | 1.16615900  |
| C | 5.24887900  | -4.90923200 | 0.94481100  |
| C | 6.74041200  | 4.21890400  | 1.08752500  |
| C | -6.09818700 | 4.66565100  | -0.34346600 |
| C | -6.23868900 | -3.02882300 | -1.98931900 |
| C | 6.46456900  | -5.01666500 | 1.65537600  |
| C | 7.91606100  | 3.74268500  | 0.46658500  |
| C | -7.18097700 | 4.32962700  | -1.18484400 |
| C | -7.58337100 | -2.86328800 | -1.59345500 |
| C | 7.42759000  | -3.99692700 | 1.58830800  |
| C | 7.84893600  | 2.99095200  | -0.71708400 |
| C | -7.56484300 | 2.98997300  | -1.35701100 |
| C | -7.93594700 | -2.85457100 | -0.23451800 |
| F | 4.35962600  | -5.90567900 | 1.03900900  |
| F | 6.85180300  | 4.94081500  | 2.20970900  |
| F | -5.76495800 | 5.95475300  | -0.20629800 |
| F | -5.95026300 | -3.02880800 | -3.29769300 |
| F | 6.70890200  | -6.10081100 | 2.40430100  |
| F | 9.11341800  | 4.01464300  | 1.00437500  |
| F | -7.85317800 | 5.29302500  | -1.82932100 |
| F | -8.54127600 | -2.71209500 | -2.52019400 |
| F | 8.57132800  | -4.12805500 | 2.27468000  |
| F | 8.98365200  | 2.56642300  | -1.28855800 |
| F | -8.59610500 | 2.70116100  | -2.16222100 |
| F | -9.22293400 | -2.69435000 | 0.10848000  |
| F | 8.14488400  | -1.89250900 | 0.77396000  |
| F | 6.58709200  | 1.99227700  | -2.45084900 |
| F | -7.28054300 | 0.68817900  | -0.88643600 |
| F | -7.33139300 | -2.99368800 | 2.04969400  |
| H | 1.46970400  | 7.08617000  | -1.32872500 |

|   |             |             |             |
|---|-------------|-------------|-------------|
| H | 2.14582000  | -3.09046500 | -4.86530400 |
| H | 0.43568800  | -6.06726600 | 1.26304700  |
| H | -4.66281100 | 1.89405000  | 5.45351900  |
| H | 3.00408600  | 6.24029400  | -1.03608400 |
| H | -5.38769400 | 1.83212400  | 3.83346500  |
| H | 1.19088800  | -2.58889800 | -3.44927100 |
| H | -0.53321100 | -5.18941300 | 2.47757200  |
| H | 1.89914400  | 6.57326300  | 0.32464100  |
| H | -4.40988500 | 3.24745900  | 4.32409500  |
| H | 2.50478800  | -3.77453600 | -3.25862400 |
| H | 0.64406100  | -4.31274900 | 1.45987600  |
| H | 0.87208100  | 5.40441800  | -3.10248900 |
| H | -3.67252600 | -0.39060900 | 4.97719400  |
| H | -0.04549900 | -5.86703700 | -1.19020200 |
| H | 4.55022800  | -2.31554000 | -5.16232700 |
| H | 0.84296500  | 3.65352300  | -2.75054100 |
| H | -2.49885800 | -0.62554300 | 3.66382200  |
| H | 0.25907400  | -4.12829900 | -1.06582600 |
| H | 4.95138800  | -3.05557100 | -3.59749800 |
| H | 2.39200900  | 4.52606200  | -2.82262900 |
| H | -4.22577100 | -0.41847500 | 3.28273800  |
| H | -1.26104000 | -4.70354700 | -1.79996300 |
| H | 5.35276400  | -1.34136800 | -3.90441200 |
| H | -2.27476600 | 1.49350200  | 5.86668200  |
| H | -0.70814700 | 5.95440800  | -1.22045500 |
| H | -1.66567700 | -7.03205700 | 0.38884300  |
| H | 2.73299800  | -0.73069900 | -5.45887600 |
| H | -1.91748400 | 2.93243200  | 4.87968800  |
| H | -0.40126500 | 5.38437500  | 0.43418700  |
| H | 3.44472100  | 0.37830700  | -4.25655600 |
| H | -2.94942500 | -6.03579100 | -0.32867200 |
| H | -1.10046200 | 1.38223200  | 4.52994600  |
| H | -2.73627900 | -6.07858400 | 1.44688400  |
| H | 1.74510000  | -0.13395000 | -4.10004100 |
| H | -0.86487600 | 4.22223300  | -0.84123800 |
| H | 3.89829500  | -0.30910700 | -2.07603800 |
| H | 1.65962700  | 4.23671800  | 0.98054200  |
| H | -2.40103400 | 2.97136900  | 2.60365300  |
| H | -2.10589000 | -3.58264800 | 1.82942500  |
| N | 4.21984200  | -2.12918300 | -1.24280000 |
| N | 3.28843700  | 3.74181700  | -0.11405700 |
| N | -4.02686800 | 2.31970800  | 1.60929200  |
| N | -3.32422900 | -3.44537900 | 0.22739100  |
| O | 2.21710700  | -0.95269500 | 0.02732400  |

|    |             |             |             |
|----|-------------|-------------|-------------|
| O  | 1.58675100  | 1.71156000  | 0.94229000  |
| O  | -0.82740600 | 0.72705500  | 2.25928900  |
| O  | -0.26370700 | -1.97675000 | 1.34919300  |
| O  | 1.02366800  | -0.57663900 | -1.88325700 |
| O  | 0.35872000  | 2.11824500  | -0.94209400 |
| O  | -2.02552500 | 1.12804900  | 0.35538800  |
| O  | -1.45540200 | -1.57776500 | -0.56103200 |
| O  | 2.81205500  | -3.96812700 | -0.83194700 |
| O  | 3.73874200  | 4.91767300  | 1.86783200  |
| O  | -3.61123900 | 4.62815100  | 1.62769900  |
| O  | -3.13899900 | -3.47122000 | -2.13624400 |
| O  | 5.97873700  | -0.58658200 | -1.05214500 |
| O  | 3.52172400  | 2.29945100  | -1.94831000 |
| O  | -4.92109200 | 0.20754800  | 1.06952400  |
| O  | -4.25929900 | -3.39450700 | 2.38250500  |
| Rh | 0.70965300  | -0.15380100 | 1.17907000  |
| Rh | -0.54748800 | 0.25685800  | -0.80830300 |

#### **<sup>1</sup>1-4**

|   |             |             |             |
|---|-------------|-------------|-------------|
| C | 2.54649000  | 4.81578500  | 4.72452300  |
| C | -5.82498000 | 4.11684700  | -2.81530800 |
| C | 5.82808000  | -3.90896100 | -3.08301900 |
| C | -2.52382500 | -5.11325300 | 4.41178900  |
| C | 3.45015400  | -0.93411300 | 3.72728600  |
| C | 3.20156400  | 1.51157800  | -3.79670300 |
| C | -3.23140300 | -1.26282700 | -3.86589500 |
| C | -3.45016000 | 0.68468200  | 3.78428300  |
| C | 3.41422100  | 2.86701100  | -3.07661100 |
| C | 4.60743500  | -0.48535700 | 4.65071600  |
| C | -4.60712500 | 0.17591500  | 4.67662500  |
| C | -1.94609600 | -1.27680300 | -4.71905300 |
| C | 2.20604600  | -1.26253000 | 4.57811400  |
| C | -2.20694900 | 0.95994300  | 4.65527100  |
| C | 1.90801100  | 1.57070900  | -4.63512600 |
| C | -4.45136900 | -0.96417100 | -4.76898900 |
| C | 4.41381900  | 1.27256300  | -4.72749800 |
| C | -3.91330500 | 2.00117800  | 3.11087900  |
| C | -3.44337300 | -2.65804000 | -3.22597700 |
| C | 3.91126100  | -2.20530600 | 2.97053400  |
| C | -1.93486600 | -0.10545800 | -1.82989800 |
| C | -1.93102100 | -0.23768600 | 1.77996200  |
| C | 1.93102300  | 0.11826400  | 1.78841300  |
| C | 1.92644400  | 0.22811400  | -1.82467100 |
| C | -3.20435500 | -0.18653700 | -2.70768700 |

|   |             |             |             |
|---|-------------|-------------|-------------|
| C | -3.19868800 | -0.38877800 | 2.65184400  |
| C | 3.20055500  | 0.21016400  | 2.66579400  |
| C | 3.18951000  | 0.36799600  | -2.70437900 |
| C | -2.89443300 | 2.11707300  | -3.82864500 |
| C | -4.40154900 | -2.57496000 | 2.52812800  |
| C | 4.40749100  | 2.39718700  | 2.67438300  |
| C | 2.88377700  | -1.86570500 | -3.96102500 |
| C | -3.71801000 | 3.36813500  | -3.79241100 |
| C | -4.17664800 | -3.95722600 | 3.04365400  |
| C | 4.18867000  | 3.74475700  | 3.27684400  |
| C | 3.71281500  | -3.11300100 | -4.00322700 |
| C | -4.87193900 | 3.12435500  | -3.02069600 |
| C | -2.99261300 | -3.95119100 | 3.80830400  |
| C | 3.00921800  | 3.69288100  | 4.04677000  |
| C | 4.86970000  | -2.91039600 | -3.22412900 |
| C | -4.81250600 | 1.71573000  | -2.53224600 |
| C | -2.43416500 | -2.56101000 | 3.81266500  |
| C | 2.44772300  | 2.30613900  | 3.96742600  |
| C | 4.80669900  | -1.53377900 | -2.65210200 |
| C | -3.49610500 | 4.61106200  | -4.37572300 |
| C | -4.91401000 | -5.12351600 | 2.86595900  |
| C | 4.92739600  | 4.91860000  | 3.16777600  |
| C | 3.49318800  | -4.31996600 | -4.65850600 |
| C | -4.45753300 | 5.62523400  | -4.17262100 |
| C | -4.44461400 | -6.30746700 | 3.47500000  |
| C | 4.46404800  | 6.06301500  | 3.85231100  |
| C | 4.45995100  | -5.34005100 | -4.52090800 |
| C | -5.60679000 | 5.38146700  | -3.40359300 |
| C | -3.26511800 | -6.30233800 | 4.23681900  |
| C | 3.28913800  | 6.01224700  | 4.61951700  |
| C | 5.61221100  | -5.13727300 | -3.74451100 |
| F | -2.41537800 | 4.88982700  | -5.11556600 |
| F | -6.04263200 | -5.17252200 | 2.14742200  |
| F | 6.05177100  | 5.01044500  | 2.44678600  |
| F | 2.40979400  | -4.55918000 | -5.40823200 |
| F | -4.27786500 | 6.83696900  | -4.71690600 |
| F | -5.12568400 | -7.45261900 | 3.32772500  |
| F | 5.14645500  | 7.21405300  | 3.77251700  |
| F | 4.28257200  | -6.51806000 | -5.13547400 |
| F | -6.50070700 | 6.36506600  | -3.22948900 |
| F | -2.84426200 | -7.44307900 | 4.80116100  |
| F | 2.87393800  | 7.11625900  | 5.25644800  |
| F | 6.51120600  | -6.12541800 | -3.63376000 |
| F | -6.93358000 | 3.92673900  | -2.08914100 |

|   |             |             |             |
|---|-------------|-------------|-------------|
| F | -1.40452900 | -5.15650200 | 5.14555900  |
| F | 1.43171700  | 4.81511100  | 5.46640500  |
| F | 6.93968400  | -3.75735500 | -2.35239400 |
| H | -4.89155100 | 0.96815800  | 5.38849700  |
| H | -2.04118300 | -2.04124300 | -5.50878000 |
| H | 3.47413000  | 3.67396300  | -3.82582100 |
| H | 4.89095200  | -1.32241100 | 5.30969900  |
| H | -4.31710200 | -0.70842400 | 5.26605400  |
| H | 4.31800700  | 0.35909300  | 5.29623400  |
| H | -1.05957300 | -1.52886500 | -4.11918100 |
| H | 4.35586400  | 2.87448300  | -2.50011500 |
| H | -5.50151900 | -0.07991300 | 4.08340800  |
| H | 5.50222200  | -0.19248000 | 4.07549300  |
| H | -1.76462900 | -0.30533600 | -5.19941700 |
| H | 2.58623000  | 3.09668100  | -2.39195400 |
| H | -2.45895800 | 1.71154400  | 5.42256000  |
| H | 2.45726100  | -2.05934000 | 5.29863500  |
| H | 1.99339100  | 2.37933300  | -5.38070600 |
| H | -4.57070000 | -1.78158600 | -5.49900500 |
| H | -1.37144800 | 1.35830300  | 4.06172100  |
| H | 1.37155900  | -1.62438500 | 3.96029900  |
| H | 1.02690600  | 1.78565800  | -4.01328800 |
| H | -4.32617100 | -0.02944500 | -5.33832500 |
| H | -1.85546400 | 0.05208100  | 5.16492500  |
| H | 1.85354900  | -0.38724400 | 5.14115700  |
| H | 1.72413900  | 0.62766600  | -5.16823300 |
| H | -5.38609900 | -0.89453400 | -4.18694700 |
| H | 4.14238800  | -3.00073000 | 3.69853200  |
| H | -4.14765800 | 2.74697200  | 3.88867500  |
| H | 4.52346700  | 2.13296400  | -5.40795400 |
| H | -3.51532500 | -3.41835400 | -4.02147700 |
| H | 4.82540400  | -2.01491600 | 2.38128000  |
| H | -4.82606500 | 1.84730100  | 2.50897700  |
| H | -4.37902200 | -2.69582600 | -2.64097500 |
| H | 4.28610700  | 0.37342600  | -5.35099500 |
| H | 3.13203000  | -2.57845700 | 2.29185700  |
| H | 5.35434800  | 1.17155000  | -4.15955600 |
| H | -2.60953800 | -2.93219900 | -2.56523000 |
| H | -3.13406400 | 2.41969300  | 2.45929000  |
| H | -3.99970500 | -0.49134200 | -1.99877400 |
| H | -4.03287500 | -0.26441900 | 1.93282600  |
| H | 4.03315400  | 0.12926200  | 1.93879000  |
| H | 3.98867800  | 0.63445500  | -1.98453200 |
| N | -3.62883300 | 1.16510800  | -3.08444000 |

|    |             |             |             |
|----|-------------|-------------|-------------|
| N  | -3.34849000 | -1.78905100 | 3.05934400  |
| N  | 3.35544200  | 1.58144300  | 3.16089400  |
| N  | 3.61759000  | -0.95661400 | -3.16424700 |
| O  | -1.61940200 | 1.05421800  | -1.38264500 |
| O  | -1.55730500 | 0.95167600  | 1.48498300  |
| O  | 1.41126000  | 1.23077000  | 1.41832400  |
| O  | 1.35102500  | 1.31015900  | -1.45076000 |
| O  | -1.35692900 | -1.20982400 | -1.53304700 |
| O  | -1.41324700 | -1.32260600 | 1.33324800  |
| O  | 1.55734100  | -1.04855400 | 1.41390500  |
| O  | 1.61281700  | -0.95884100 | -1.45452400 |
| O  | -1.82105300 | 1.93710500  | -4.38461200 |
| O  | -5.28909000 | -2.15910000 | 1.79462000  |
| O  | 5.29022400  | 2.02642000  | 1.91148700  |
| O  | 1.80731900  | -1.65802600 | -4.50114200 |
| O  | -5.59314100 | 1.11752500  | -1.80315300 |
| O  | -1.41367500 | -2.15924500 | 4.35182200  |
| O  | 1.43001200  | 1.87347800  | 4.48764600  |
| O  | 5.58872200  | -0.97660700 | -1.89263800 |
| Rh | -0.10752800 | 1.18810600  | 0.01942100  |
| Rh | 0.10439200  | -1.18630300 | -0.06134900 |

**Sub**

|   |             |             |             |
|---|-------------|-------------|-------------|
| C | -0.38664000 | -0.12955900 | -0.47716800 |
| C | -1.12513700 | 1.06232500  | -0.61374400 |
| C | -2.46861200 | 1.13306200  | -0.21446200 |
| C | -3.10122200 | 0.00650000  | 0.33058900  |
| C | -2.38035900 | -1.18993700 | 0.47042400  |
| C | -1.03902800 | -1.25455200 | 0.06910500  |
| H | -0.64060800 | 1.94506100  | -1.04395100 |
| H | -3.02174400 | 2.06960900  | -0.33341000 |
| H | -4.14918200 | 0.05779200  | 0.63975200  |
| H | -2.86618000 | -2.07717900 | 0.88764100  |
| H | -0.48809000 | -2.19549600 | 0.17410100  |
| C | 1.07091300  | -0.21031600 | -0.89170000 |
| H | 1.31255200  | 0.63048700  | -1.56810000 |
| H | 1.23069400  | -1.13520500 | -1.47659500 |
| C | 2.08200400  | -0.20358500 | 0.28977100  |
| H | 1.79463800  | -1.02605400 | 0.97339300  |
| C | 3.50563000  | -0.48630400 | -0.22305000 |
| H | 3.83766700  | 0.30149100  | -0.92250300 |
| H | 4.22928700  | -0.51807900 | 0.60889800  |
| H | 3.56078400  | -1.45120200 | -0.75555800 |
| C | 2.03110100  | 1.11199900  | 1.08525600  |

|   |            |            |            |
|---|------------|------------|------------|
| H | 2.32472000 | 1.96725600 | 0.45025000 |
| H | 1.01952500 | 1.31211000 | 1.47298300 |
| H | 2.72403700 | 1.08159800 | 1.94296700 |

# Pro1

|   |             |             |             |
|---|-------------|-------------|-------------|
| N | -2.33485600 | -0.86122900 | -0.61481100 |
| S | -1.37519500 | -2.23152600 | -0.47579900 |
| O | -2.19670000 | -3.34491800 | 0.00796500  |
| O | -0.30176000 | -1.95670800 | 0.84136200  |
| O | -0.56808500 | -2.28750500 | -1.70223700 |
| C | -1.22543700 | 3.29359900  | -1.50442000 |
| C | -2.19289200 | 2.27896000  | -1.43614200 |
| C | -2.90187700 | 2.02646100  | -0.24109300 |
| C | -2.62603500 | 2.84017900  | 0.87851900  |
| C | -1.66404400 | 3.85785700  | 0.81215900  |
| C | -0.95609300 | 4.08462100  | -0.37870000 |
| H | -0.69133400 | 3.47068500  | -2.44218900 |
| H | -2.41858400 | 1.68701300  | -2.32988300 |
| H | -3.18371800 | 2.68339800  | 1.80692100  |
| H | -1.47276700 | 4.48090200  | 1.69073800  |
| H | -0.20822500 | 4.88073800  | -0.43113200 |
| C | -3.93436500 | 0.91649100  | -0.17810800 |
| H | -4.75874100 | 1.21127000  | 0.49333300  |
| H | -4.37315800 | 0.77046600  | -1.17972400 |
| C | -3.44137200 | -0.48708700 | 0.32541000  |
| H | -1.73530900 | -0.06466700 | -0.86572600 |
| C | -2.98985600 | -0.43214300 | 1.79785100  |
| H | -2.17084400 | 0.28755100  | 1.94609500  |
| H | -3.83453000 | -0.13134800 | 2.44022500  |
| H | -2.64279000 | -1.42005900 | 2.13447900  |
| C | -4.61209000 | -1.47618900 | 0.15796000  |
| H | -4.90328000 | -1.55471600 | -0.90119000 |
| H | -4.34110400 | -2.47813900 | 0.51606000  |
| H | -5.48088100 | -1.12018800 | 0.73597600  |
| C | 0.93865700  | -1.36304600 | 0.57250300  |
| C | 1.15348400  | -0.03055900 | 0.94354500  |
| C | 1.98509500  | -2.11946400 | 0.02218600  |
| C | 2.42228500  | 0.54328600  | 0.76675200  |
| H | 0.33814200  | 0.54893900  | 1.38223000  |
| C | 3.23964900  | -1.52807600 | -0.15109400 |
| H | 1.80732900  | -3.15736300 | -0.26444700 |
| C | 3.49351200  | -0.18593200 | 0.21489100  |
| H | 2.56293600  | 1.58226700  | 1.07070400  |
| H | 4.04108700  | -2.13510200 | -0.58153500 |



|   |            |             |             |
|---|------------|-------------|-------------|
| C | 4.89829900 | 0.41643500  | 0.00618800  |
| C | 4.97998700 | 1.88941700  | 0.46289800  |
| C | 5.93518600 | -0.40101900 | 0.82132900  |
| C | 5.26523800 | 0.35606000  | -1.50033300 |
| H | 4.28434300 | 2.53378800  | -0.10043500 |
| H | 4.76050300 | 1.99989200  | 1.53808700  |
| H | 5.99903600 | 2.27445200  | 0.29235200  |
| H | 5.95842400 | -1.45854500 | 0.51302600  |
| H | 6.94834600 | 0.01223000  | 0.67674000  |
| H | 5.70340600 | -0.37046100 | 1.89883900  |
| H | 6.27223300 | 0.77616300  | -1.66663900 |
| H | 5.26691600 | -0.67750900 | -1.88186100 |
| H | 4.54806300 | 0.93532300  | -2.10511700 |

## Pro2

|   |             |             |             |
|---|-------------|-------------|-------------|
| N | 2.09312300  | -0.69572500 | -0.56578800 |
| S | 1.56574600  | -2.24745400 | -0.16488700 |
| O | 2.45296500  | -3.23597600 | -0.79223000 |
| O | 0.16363600  | -2.41205500 | -1.08537200 |
| O | 1.20516400  | -2.26586600 | 1.26175800  |
| C | -0.98335600 | -1.69885600 | -0.69136600 |
| C | -1.76919000 | -2.15062400 | 0.37841800  |
| C | -1.37950500 | -0.59308800 | -1.44900600 |
| C | -2.95554200 | -1.47509700 | 0.68176700  |
| H | -1.44844300 | -3.01760100 | 0.95793900  |
| C | -2.57755500 | 0.06520900  | -1.13251800 |
| H | -0.75761500 | -0.26125700 | -2.28221800 |
| C | -3.39155200 | -0.35443700 | -0.06186600 |
| H | -3.55731000 | -1.84006100 | 1.51882300  |
| H | -2.86827700 | 0.92377300  | -1.74045500 |
| C | -4.71151800 | 0.35107300  | 0.31264700  |
| C | -4.61687300 | 0.87712100  | 1.76941800  |
| H | -3.79466800 | 1.60419800  | 1.87376100  |
| H | -5.55703500 | 1.37845900  | 2.05740200  |
| H | -4.43809100 | 0.06255900  | 2.48951300  |
| C | -5.88414500 | -0.65945700 | 0.20524000  |
| H | -6.83609200 | -0.17191700 | 0.47770000  |
| H | -5.97954200 | -1.04606000 | -0.82291100 |
| H | -5.74642500 | -1.52211600 | 0.87669000  |
| C | -5.02114400 | 1.54826700  | -0.61243600 |
| H | -5.96999000 | 2.01834000  | -0.30497300 |
| H | -4.23662700 | 2.32164800  | -0.56082100 |
| H | -5.13227000 | 1.23733200  | -1.66475100 |
| C | 1.83855600  | 1.67766500  | 0.13961400  |

|   |            |             |             |
|---|------------|-------------|-------------|
| C | 1.56592300 | 2.08551100  | -1.17835300 |
| C | 1.08748500 | 3.37757100  | -1.44565700 |
| C | 0.87043100 | 4.28252500  | -0.39703300 |
| C | 1.13116300 | 3.88411300  | 0.92307100  |
| C | 1.61036200 | 2.59373400  | 1.18582100  |
| H | 1.71039500 | 1.38206400  | -2.00230200 |
| H | 0.88150000 | 3.67473200  | -2.47823000 |
| H | 0.49487500 | 5.28835700  | -0.60518900 |
| H | 0.95361500 | 4.57597200  | 1.75157500  |
| H | 1.80133800 | 2.28909400  | 2.22049500  |
| C | 2.41156400 | 0.30107800  | 0.48250900  |
| H | 2.77990900 | -0.77341800 | -1.31999100 |
| H | 1.90397900 | -0.05860600 | 1.39178900  |
| C | 3.94390500 | 0.37146000  | 0.80248800  |
| C | 4.46486600 | -0.93778600 | 1.42117500  |
| H | 4.43027100 | -1.77041500 | 0.69903900  |
| H | 5.51480500 | -0.81964300 | 1.73660800  |
| H | 3.87471500 | -1.23548500 | 2.30270100  |
| C | 4.79516200 | 0.79362200  | -0.40931300 |
| H | 4.80940700 | 0.01703500  | -1.19610200 |
| H | 4.43648500 | 1.73365500  | -0.85776500 |
| H | 5.84328300 | 0.94253300  | -0.10311000 |
| H | 4.03567700 | 1.16972300  | 1.56252500  |

**ONIOM(M06/def2-TZVP:UFF)//ONIOM(BPW91/LANL2DZ-6-31G\*:UFF)**

**<sup>1</sup>1**

|       |   |             |             |             |   |
|-------|---|-------------|-------------|-------------|---|
| C-C_R | 0 | -4.68140100 | -3.58664100 | 1.16740600  | L |
| C-C_R | 0 | 3.04019700  | 5.04339800  | 2.81057400  | L |
| C-C_R | 0 | 5.05221500  | -3.03178900 | 2.81362300  | L |
| C-C_R | 0 | -3.58709300 | 4.67536500  | 1.17401500  | L |
| C-C_3 | 0 | -0.38804000 | -4.96640900 | -2.68556100 | L |
| C-C_3 | 0 | 4.96425800  | -0.38348100 | -2.68925600 | L |
| C-C_3 | 0 | 0.37984900  | 4.96998700  | -2.68084000 | L |
| C-C_3 | 0 | -4.97207500 | 0.38450800  | -2.67775100 | L |
| C-C_3 | 0 | 4.72828400  | 0.91655500  | -3.49481400 | L |
| C-C_3 | 0 | -0.45663000 | -6.47862900 | -2.36309100 | L |
| C-C_3 | 0 | -6.48373300 | 0.45323700  | -2.35269700 | L |
| C-C_3 | 0 | 1.59762700  | 4.61859500  | -3.56684300 | L |
| C-C_3 | 0 | -1.60913400 | -4.61409600 | -3.56661500 | L |
| C-C_3 | 0 | -4.62154800 | 1.60445700  | -3.56110400 | L |

|       |   |             |             |             |   |
|-------|---|-------------|-------------|-------------|---|
| C-C_3 | 0 | 4.61077400  | -1.60228200 | -3.57303000 | L |
| C-C_3 | 0 | 0.45006500  | 6.48170900  | -2.35642300 | L |
| C-C_3 | 0 | 6.47653800  | -0.45386500 | -2.36747400 | L |
| C-C_3 | 0 | -4.73663000 | -0.91460600 | -3.48496700 | L |
| C-C_3 | 0 | -0.92114800 | 4.73494000  | -3.48512300 | L |
| C-C_3 | 0 | 0.90999400  | -4.72985200 | -3.49419400 | L |
| C-C_R | 0 | 0.18359000  | 2.64259100  | -1.40671300 | H |
| C-C_R | 0 | -2.64417500 | 0.18665500  | -1.40490000 | H |
| C-C_R | 0 | -0.18840300 | -2.64068900 | -1.40895600 | H |
| C-C_R | 0 | 2.63918200  | -0.18508100 | -1.41116900 | H |
| C-C_3 | 0 | 0.35114600  | 4.16412200  | -1.32740400 | L |
| C-C_3 | 0 | -4.16575200 | 0.35331400  | -1.32466700 | L |
| C-C_3 | 0 | -0.35483200 | -4.16244800 | -1.33108700 | L |
| C-C_3 | 0 | 4.16084600  | -0.35268800 | -1.33440900 | L |
| C-C_R | 0 | 2.81402400  | 3.86848700  | -0.53715000 | L |
| C-C_R | 0 | -5.07715100 | 1.45877300  | 0.82297100  | L |
| C-C_R | 0 | -1.45756600 | -5.07913500 | 0.81551700  | L |
| C-C_R | 0 | 3.86712100  | -2.81443800 | -0.54060800 | L |
| C-C_R | 0 | 3.48541700  | 4.04852900  | 0.74599900  | L |
| C-C_R | 0 | -4.76370600 | 2.68482500  | 1.55307000  | L |
| C-C_R | 0 | -2.68281200 | -4.76852000 | 1.54786000  | L |
| C-C_R | 0 | 4.04995600  | -3.48196300 | 0.74332000  | L |
| C-C_R | 0 | 2.68848500  | 4.75839000  | 1.54377000  | L |
| C-C_R | 0 | -4.05298300 | 3.48277500  | 0.75637300  | L |
| C-C_R | 0 | -3.48402000 | -4.05428400 | 0.75419500  | L |
| C-C_R | 0 | 4.76054400  | -2.68597600 | 1.54139200  | L |
| C-C_R | 0 | 1.46106800  | 5.07437000  | 0.81844000  | L |
| C-C_R | 0 | -3.87086200 | 2.81401100  | -0.52784900 | L |
| C-C_R | 0 | -2.81428200 | -3.86877800 | -0.52974900 | L |
| C-C_R | 0 | 5.07423700  | -1.45957500 | 0.81189500  | L |
| C-C_R | 0 | 4.68069100  | 3.58115100  | 1.16570600  | L |
| C-C_R | 0 | -5.05739200 | 3.02585200  | 2.82237700  | L |
| C-C_R | 0 | -3.02088800 | -5.06796300 | 2.81519400  | L |
| C-C_R | 0 | 3.58752400  | -4.67110000 | 1.16972500  | L |
| C-C_R | 0 | 5.08437700  | 3.85003400  | 2.43416400  | L |
| C-C_R | 0 | -4.59966500 | 4.27139400  | 3.30489100  | L |
| C-C_R | 0 | -4.26496700 | -4.61035400 | 3.29080400  | L |
| C-C_R | 0 | 3.88838100  | -5.05732000 | 2.49418600  | L |
| C-C_R | 0 | 4.29074600  | 4.57270500  | 3.26851100  | L |
| C-C_R | 0 | -3.87634500 | 5.08232100  | 2.49431000  | L |
| C-C_R | 0 | -5.09292700 | -3.85562900 | 2.42919300  | L |
| C-C_R | 0 | 4.61553800  | -4.22733400 | 3.28831400  | L |
| F-F_  | 0 | 5.46945100  | 2.85356100  | 0.33526500  | L |
| F-F_  | 0 | -5.77194900 | 2.19543800  | 3.62237400  | L |

|      |   |             |             |             |   |
|------|---|-------------|-------------|-------------|---|
| F-F_ | 0 | -2.19182300 | -5.78472000 | 3.61452900  | L |
| F-F_ | 0 | 2.85571800  | -5.47508600 | 0.35849300  | L |
| F-F_ | 0 | 6.28329100  | 3.39039100  | 2.87240200  | L |
| F-F_ | 0 | -4.87850400 | 4.65065000  | 4.57695200  | L |
| F-F_ | 0 | -4.65919500 | -4.88386300 | 4.55908400  | L |
| F-F_ | 0 | 3.44757000  | -6.24802200 | 2.97131300  | L |
| F-F_ | 0 | 4.69280600  | 4.83596200  | 4.53688400  | L |
| F-F_ | 0 | -3.42653200 | 6.27808100  | 2.94990000  | L |
| F-F_ | 0 | -6.29219600 | -3.39836800 | 2.86785100  | L |
| F-F_ | 0 | 4.90141500  | -4.59229300 | 4.56337500  | L |
| F-F_ | 0 | 2.22236200  | 5.75528400  | 3.62562100  | L |
| F-F_ | 0 | -2.85773900 | 5.46941300  | 0.35075000  | L |
| F-F_ | 0 | -5.46494600 | -2.85764100 | 0.33324600  | L |
| F-F_ | 0 | 5.76851100  | -2.19847300 | 3.60963000  | L |
| H-H_ | 0 | -7.09149100 | 0.42394400  | -3.28321700 | L |
| H-H_ | 0 | 1.54954900  | 5.17695800  | -4.52677800 | L |
| H-H_ | 0 | 5.36869200  | 0.93603500  | -4.40325600 | L |
| H-H_ | 0 | -0.42866700 | -7.08474900 | -3.29472200 | L |
| H-H_ | 0 | -6.73652100 | 1.39286200  | -1.81636400 | L |
| H-H_ | 0 | -1.39560100 | -6.73220900 | -1.82599200 | L |
| H-H_ | 0 | 1.63999500  | 3.54058400  | -3.81482900 | L |
| H-H_ | 0 | 4.98343300  | 1.80764200  | -2.88289300 | L |
| H-H_ | 0 | -6.78873900 | -0.40394800 | -1.71389400 | L |
| H-H_ | 0 | 0.40132800  | -6.78492100 | -1.72594700 | L |
| H-H_ | 0 | 2.54768500  | 4.90614300  | -3.07159800 | L |
| H-H_ | 0 | 3.67923000  | 1.01327800  | -3.83649000 | L |
| H-H_ | 0 | -5.18055100 | 1.55852900  | -4.52077100 | L |
| H-H_ | 0 | -1.56449900 | -5.17119900 | -4.52744700 | L |
| H-H_ | 0 | 5.16748500  | -1.55572600 | -4.53399800 | L |
| H-H_ | 0 | 0.41913400  | 7.08917900  | -3.28707900 | L |
| H-H_ | 0 | -3.54371100 | 1.64764400  | -3.80971500 | L |
| H-H_ | 0 | -1.65261300 | -3.53576100 | -3.81301500 | L |
| H-H_ | 0 | 3.53231600  | -1.64450800 | -3.81908500 | L |
| H-H_ | 0 | 1.39094700  | 6.73415500  | -1.82213700 | L |
| H-H_ | 0 | -4.90889500 | 2.55327300  | -3.06335800 | L |
| H-H_ | 0 | -2.55729700 | -4.90242700 | -3.06819000 | L |
| H-H_ | 0 | 4.89874300  | -2.55182200 | -3.07704500 | L |
| H-H_ | 0 | -0.40560600 | 6.78738400  | -1.71591500 | L |
| H-H_ | 0 | 0.92801500  | -5.37090700 | -4.40220900 | L |
| H-H_ | 0 | -5.37928400 | -0.93406900 | -4.39182100 | L |
| H-H_ | 0 | 7.08234300  | -0.42429700 | -3.29925900 | L |
| H-H_ | 0 | -0.94215400 | 5.37709800  | -4.39229400 | L |
| H-H_ | 0 | 1.80267500  | -4.98373900 | -2.88407800 | L |
| H-H_ | 0 | -4.98918000 | -1.80649000 | -2.87312800 | L |

|       |   |             |             |             |   |
|-------|---|-------------|-------------|-------------|---|
| H-H_  | 0 | -1.81154300 | 4.98844700  | -2.87151600 | L |
| H-H_  | 0 | 6.72960500  | -1.39418700 | -1.83249600 | L |
| H-H_  | 0 | 1.00504100  | -3.68099600 | -3.83692400 | L |
| H-H_  | 0 | 6.78367700  | 0.40247500  | -1.72855800 | L |
| H-H_  | 0 | -1.01780500 | 3.68650100  | -3.82870900 | L |
| H-H_  | 0 | -3.68834200 | -1.00985700 | -3.82939000 | L |
| H-H_  | 0 | -0.55952000 | 4.51480000  | -0.79317000 | L |
| H-H_  | 0 | -4.51573100 | -0.55860300 | -0.79221000 | L |
| H-H_  | 0 | 0.55792500  | -4.51336500 | -0.80052300 | L |
| H-H_  | 0 | 4.51257800  | 0.55867000  | -0.80210700 | L |
| N-N_R | 0 | 1.51853300  | 4.48494600  | -0.48679300 | L |
| N-N_R | 0 | -4.48699600 | 1.51873500  | -0.48152500 | L |
| N-N_R | 0 | -1.51908100 | -4.48518100 | -0.48685200 | L |
| N-N_R | 0 | 4.48307200  | -1.51887200 | -0.49269300 | L |
| O-O_R | 0 | 0.03005900  | 2.05848000  | -0.27349500 | H |
| O-O_R | 0 | -2.05947400 | 0.03126300  | -0.27223400 | H |
| O-O_R | 0 | -0.03223300 | -2.05780700 | -0.27546700 | H |
| O-O_R | 0 | 2.05706300  | -0.03070100 | -0.27701200 | H |
| O-O_R | 0 | 0.22280300  | 2.05561700  | -2.54082200 | H |
| O-O_R | 0 | -2.05778200 | 0.22834600  | -2.53921400 | H |
| O-O_R | 0 | -0.23062000 | -2.05240400 | -2.54227700 | H |
| O-O_R | 0 | 2.05023300  | -0.22519400 | -2.54422100 | H |
| O-O_R | 0 | 3.12414000  | 2.97628400  | -1.36924000 | L |
| O-O_R | 0 | -5.43328100 | 0.38218800  | 1.37290800  | L |
| O-O_R | 0 | -0.38042600 | -5.43747000 | 1.36293100  | L |
| O-O_R | 0 | 2.97179600  | -3.12539300 | -1.36901000 | L |
| O-O_R | 0 | 0.38515300  | 5.42481700  | 1.37325600  | L |
| O-O_R | 0 | -2.97874400 | 3.12689900  | -1.35903500 | L |
| O-O_R | 0 | -3.12886900 | -2.97666400 | -1.36032400 | L |
| O-O_R | 0 | 5.42913400  | -0.38310700 | 1.36280900  | L |
| Rh-   | 0 | -0.00112900 | 0.00032600  | -0.22198800 | H |
| Rh-   | 0 | -0.00389700 | 0.00162900  | -2.59930900 | H |

## <sup>12</sup>

|       |   |             |             |             |   |
|-------|---|-------------|-------------|-------------|---|
| C-C_R | 0 | 5.52092500  | 1.65877700  | 2.60338500  | L |
| C-C_R | 0 | -4.58103700 | -3.79027400 | 0.61338200  | L |
| C-C_R | 0 | -4.11437000 | 4.48406900  | 0.99372700  | L |
| C-C_R | 0 | 1.69643600  | -5.54411000 | 0.99690800  | L |
| C-C_3 | 0 | 3.49918900  | 4.70953100  | -2.07835000 | L |
| C-C_3 | 0 | -2.64129900 | 2.35041600  | -4.52449900 | L |
| C-C_3 | 0 | -0.49972900 | -4.23391400 | -3.87739400 | L |
| C-C_3 | 0 | 5.76228600  | -2.00003000 | -1.46059300 | L |
| C-C_3 | 0 | -2.50311000 | 1.10223700  | -5.42969000 | L |
| C-C_3 | 0 | 3.93306000  | 6.08883300  | -1.52690100 | L |

|       |   |             |             |             |   |
|-------|---|-------------|-------------|-------------|---|
| C-C_3 | 0 | 6.94092100  | -2.63874000 | -0.68743700 | L |
| C-C_3 | 0 | -1.20765100 | -3.40939200 | -4.97744100 | L |
| C-C_3 | 0 | 4.76452900  | 3.98592100  | -2.59421800 | L |
| C-C_3 | 0 | 5.35472300  | -2.97220400 | -2.59174400 | L |
| C-C_3 | 0 | -1.63580200 | 3.43202200  | -4.98259700 | L |
| C-C_3 | 0 | -1.16475600 | -5.63047800 | -3.82700000 | L |
| C-C_3 | 0 | -4.06938800 | 2.91039700  | -4.73075900 | L |
| C-C_3 | 0 | 6.28320900  | -0.68339000 | -2.08472800 | L |
| C-C_3 | 0 | 0.98154900  | -4.44679000 | -4.27332800 | L |
| C-C_3 | 0 | 2.54043800  | 4.96974800  | -3.26506400 | L |
| C-C_R | 0 | 0.06505500  | -2.20992000 | -2.25002800 | H |
| C-C_R | 0 | 3.35566400  | -0.97667400 | -0.97501900 | H |
| C-C_R | 0 | 2.13842700  | 2.56595800  | -1.29186600 | H |
| C-C_R | 0 | -1.14957500 | 1.28584000  | -2.60273800 | H |
| C-C_3 | 0 | -0.60306600 | -3.57284300 | -2.45145900 | L |
| C-C_3 | 0 | 4.59325000  | -1.70750700 | -0.44624900 | L |
| C-C_3 | 0 | 2.76210500  | 3.91859300  | -0.93357800 | L |
| C-C_3 | 0 | -2.46410200 | 1.96380100  | -3.00927500 | L |
| C-C_R | 0 | -2.98252100 | -2.51162500 | -2.29535400 | L |
| C-C_R | 0 | 4.19061200  | -3.09718800 | 1.68777400  | L |
| C-C_R | 0 | 3.31427300  | 4.26400400  | 1.56179300  | L |
| C-C_R | 0 | -1.74762000 | 4.05343900  | -1.63322700 | L |
| C-C_R | 0 | -4.05301800 | -2.56531400 | -1.30317100 | L |
| C-C_R | 0 | 3.22511200  | -4.12601800 | 2.06493600  | L |
| C-C_R | 0 | 4.03027100  | 3.47837600  | 2.56358000  | L |
| C-C_R | 0 | -2.22306800 | 4.63279700  | -0.38196500 | L |
| C-C_R | 0 | -3.77725600 | -3.53841600 | -0.43529200 | L |
| C-C_R | 0 | 2.66245000  | -4.60649300 | 0.95656700  | L |
| C-C_R | 0 | 4.77088600  | 2.56218200  | 1.93658100  | L |
| C-C_R | 0 | -3.43450000 | 4.14357100  | -0.12160600 | L |
| C-C_R | 0 | -2.51831000 | -4.16833000 | -0.82148500 | L |
| C-C_R | 0 | 3.22916900  | -3.90894700 | -0.19333600 | L |
| C-C_R | 0 | 4.56725900  | 2.71093800  | 0.49858900  | L |
| C-C_R | 0 | -3.79620100 | 3.21863000  | -1.19256000 | L |
| C-C_R | 0 | -5.15173100 | -1.79025500 | -1.17774800 | L |
| C-C_R | 0 | 2.85654300  | -4.54732600 | 3.28985500  | L |
| C-C_R | 0 | 3.98384500  | 3.55781900  | 3.90586400  | L |
| C-C_R | 0 | -1.61517900 | 5.48683600  | 0.46078700  | L |
| C-C_R | 0 | -6.00311500 | -2.01634600 | -0.14347300 | L |
| C-C_R | 0 | 1.85176200  | -5.53457800 | 3.38506900  | L |
| C-C_R | 0 | 4.75552300  | 2.64220700  | 4.64707900  | L |
| C-C_R | 0 | -2.30911100 | 5.85925300  | 1.63308400  | L |
| C-C_R | 0 | -5.74163300 | -2.99933800 | 0.75836900  | L |
| C-C_R | 0 | 1.28165300  | -6.02505700 | 2.25732400  | L |

|       |   |             |             |             |   |
|-------|---|-------------|-------------|-------------|---|
| C-C_R | 0 | 5.53079100  | 1.68279500  | 3.95728700  | L |
| C-C_R | 0 | -3.54630300 | 5.34908000  | 1.87344100  | L |
| F-F_  | 0 | -5.40204400 | -0.79670700 | -2.06738600 | L |
| F-F_  | 0 | 3.42796000  | -4.03345800 | 4.40767200  | L |
| F-F_  | 0 | 3.21644500  | 4.48586600  | 4.53023700  | L |
| F-F_  | 0 | -0.37667200 | 5.97410200  | 0.19886100  | L |
| F-F_  | 0 | -7.11191500 | -1.24753400 | -0.00120000 | L |
| F-F_  | 0 | 1.45492500  | -5.98422600 | 4.60160800  | L |
| F-F_  | 0 | 4.74902600  | 2.67629600  | 6.00263800  | L |
| F-F_  | 0 | -1.74065800 | 6.71891400  | 2.51486300  | L |
| F-F_  | 0 | -6.58478800 | -3.21661300 | 1.79784800  | L |
| F-F_  | 0 | 0.31076300  | -6.96875800 | 2.33769600  | L |
| F-F_  | 0 | 6.27663700  | 0.78654200  | 4.65024300  | L |
| F-F_  | 0 | -4.21540900 | 5.70260100  | 2.99950800  | L |
| F-F_  | 0 | -4.28870200 | -4.76867700 | 1.50607000  | L |
| F-F_  | 0 | 1.13202500  | -6.01725300 | -0.14205000 | L |
| F-F_  | 0 | 6.25712400  | 0.73882400  | 1.93058700  | L |
| F-F_  | 0 | -5.34798200 | 3.97487700  | 1.23358400  | L |
| H-H_  | 0 | 7.80770800  | -2.81555500 | -1.36086800 | L |
| H-H_  | 0 | -1.05220300 | -3.88053100 | -5.97211600 | L |
| H-H_  | 0 | -2.75887400 | 1.35164200  | -6.48234700 | L |
| H-H_  | 0 | 4.41744400  | 6.69884000  | -2.32020900 | L |
| H-H_  | 0 | 6.64971500  | -3.61770800 | -0.25002600 | L |
| H-H_  | 0 | 4.66258600  | 5.97679600  | -0.69639600 | L |
| H-H_  | 0 | -0.82261200 | -2.37310900 | -5.03843500 | L |
| H-H_  | 0 | -3.19000300 | 0.29629900  | -5.09353700 | L |
| H-H_  | 0 | 7.27562500  | -1.97520300 | 0.13934400  | L |
| H-H_  | 0 | 3.05564100  | 6.65415700  | -1.14435100 | L |
| H-H_  | 0 | -2.30269800 | -3.37069600 | -4.80534100 | L |
| H-H_  | 0 | -1.47082600 | 0.70141300  | -5.43787400 | L |
| H-H_  | 0 | 6.19215600  | -3.09844800 | -3.31169500 | L |
| H-H_  | 0 | 5.22344300  | 4.55999700  | -3.42812300 | L |
| H-H_  | 0 | -1.78448300 | 3.66514700  | -6.05918700 | L |
| H-H_  | 0 | -1.06567800 | -6.15266000 | -4.80350500 | L |
| H-H_  | 0 | 4.48013200  | -2.60729500 | -3.16402300 | L |
| H-H_  | 0 | 4.54143200  | 2.97129100  | -2.97666400 | L |
| H-H_  | 0 | -0.58473800 | 3.10706300  | -4.85765500 | L |
| H-H_  | 0 | -2.24908000 | -5.55080100 | -3.59828200 | L |
| H-H_  | 0 | 5.12150100  | -3.97881200 | -2.18827800 | L |
| H-H_  | 0 | 5.53041500  | 3.90386100  | -1.79578200 | L |
| H-H_  | 0 | -1.78179000 | 4.37560900  | -4.41705600 | L |
| H-H_  | 0 | -0.69072300 | -6.26418100 | -3.04623700 | L |
| H-H_  | 0 | 3.02432300  | 5.62201100  | -4.02411000 | L |
| H-H_  | 0 | 7.17008500  | -0.87764100 | -2.72620000 | L |

|       |   |             |             |             |   |
|-------|---|-------------|-------------|-------------|---|
| H-H_  | 0 | -4.25170000 | 3.14875800  | -5.80125500 | L |
| H-H_  | 0 | 1.05486300  | -5.01750400 | -5.22447900 | L |
| H-H_  | 0 | 1.61693300  | 5.48035100  | -2.91799400 | L |
| H-H_  | 0 | 6.59017500  | 0.03107800  | -1.29161900 | L |
| H-H_  | 0 | 1.51784600  | -5.02377400 | -3.49008500 | L |
| H-H_  | 0 | -4.22225400 | 3.84482300  | -4.14955600 | L |
| H-H_  | 0 | 2.25042400  | 4.03327800  | -3.78083300 | L |
| H-H_  | 0 | -4.83296600 | 2.17018500  | -4.40697000 | L |
| H-H_  | 0 | 1.51503900  | -3.48921300 | -4.43093600 | L |
| H-H_  | 0 | 5.52167700  | -0.19412200 | -2.72326600 | L |
| H-H_  | 0 | -0.05066000 | -4.25477000 | -1.76860700 | L |
| H-H_  | 0 | 5.02493300  | -1.00900600 | 0.30422200  | L |
| H-H_  | 0 | 1.89525700  | 4.55519100  | -0.64738400 | L |
| H-H_  | 0 | -3.24579400 | 1.19965400  | -2.79975100 | L |
| N-N_R | 0 | -1.99919200 | -3.50937900 | -1.98318600 | L |
| N-N_R | 0 | 4.17297500  | -2.92859500 | 0.26443100  | L |
| N-N_R | 0 | 3.62046300  | 3.76232500  | 0.25473300  | L |
| N-N_R | 0 | -2.71877400 | 3.12178300  | -2.13294500 | L |
| O-O_R | 0 | 0.01842200  | -1.77643500 | -1.04406400 | H |
| O-O_R | 0 | 2.51747200  | -0.62941900 | -0.06468400 | H |
| O-O_R | 0 | 1.40559400  | 2.05902800  | -0.36847700 | H |
| O-O_R | 0 | -1.10954700 | 0.88128900  | -1.38511300 | H |
| O-O_R | 0 | 0.60240100  | -1.60262600 | -3.23412400 | H |
| O-O_R | 0 | 3.21476900  | -0.76990100 | -2.22361300 | H |
| O-O_R | 0 | 2.38572100  | 2.02730900  | -2.42124600 | H |
| O-O_R | 0 | -0.20199600 | 1.17708400  | -3.44710900 | H |
| O-O_R | 0 | -2.74278000 | -1.50402700 | -3.01132500 | L |
| O-O_R | 0 | 4.63244000  | -2.22376600 | 2.48172800  | L |
| O-O_R | 0 | 2.29940100  | 4.96777300  | 1.81278200  | L |
| O-O_R | 0 | -0.55197100 | 4.09503000  | -2.02527100 | L |
| O-O_R | 0 | -1.80862400 | -4.85897400 | -0.04220700 | L |
| O-O_R | 0 | 2.66652700  | -3.85283400 | -1.31828400 | L |
| O-O_R | 0 | 4.83366400  | 1.81138700  | -0.34101000 | L |
| O-O_R | 0 | -4.74543000 | 2.39222100  | -1.13190200 | L |
| Rh-   | 0 | 0.67792800  | 0.12443800  | -0.60114400 | H |
| Rh-   | 0 | 1.52010700  | 0.21230200  | -2.87384800 | H |
| N-N_R | 0 | -0.06593000 | 0.16663100  | 1.18648200  | H |
| S-S_R | 0 | -0.31152900 | -1.17796900 | 2.11474900  | H |
| O-O_R | 0 | 0.38140100  | -2.42891500 | 1.76768600  | H |
| O-O_R | 0 | -1.93325900 | -1.39082800 | 1.40194900  | H |
| O-O_R | 0 | -0.48028600 | -0.78240600 | 3.52890400  | H |
| C-C_R | 0 | -3.02956100 | -0.87496700 | 2.03641900  | H |
| C-C_R | 0 | -3.79932100 | 0.08260000  | 1.34810400  | H |
| C-C_R | 0 | -3.45024500 | -1.35337900 | 3.29686200  | H |



|       |   |             |             |            |   |
|-------|---|-------------|-------------|------------|---|
| C-C_R | 0 | -4.99694500 | 0.53245900  | 1.90454900 | H |
| H-H_  | 0 | -3.42898400 | 0.45639600  | 0.39177900 | H |
| C-C_R | 0 | -4.65638000 | -0.89579700 | 3.82652300 | H |
| H-H_  | 0 | -2.84883400 | -2.09779100 | 3.81999200 | H |
| C-C_R | 0 | -5.46422100 | 0.04987900  | 3.14993900 | H |
| H-H_  | 0 | -5.58097300 | 1.27004400  | 1.35292500 | H |
| H-H_  | 0 | -4.98156200 | -1.29552700 | 4.79054100 | H |
| C-C_3 | 0 | -6.79479800 | 0.50811900  | 3.77288700 | H |
| C-C_3 | 0 | -7.72989400 | -0.72065200 | 3.93763300 | H |
| H-H_  | 0 | -7.27479200 | -1.50597700 | 4.56174000 | H |
| H-H_  | 0 | -8.67524100 | -0.41509400 | 4.41757500 | H |
| H-H_  | 0 | -7.97298500 | -1.16506300 | 2.95871100 | H |
| C-C_3 | 0 | -7.52611100 | 1.55410800  | 2.90398200 | H |
| H-H_  | 0 | -8.47630500 | 1.83506000  | 3.38698100 | H |
| H-H_  | 0 | -6.93318400 | 2.47530600  | 2.78391400 | H |
| H-H_  | 0 | -7.76890700 | 1.16224900  | 1.90217300 | H |
| C-C_3 | 0 | -6.51938400 | 1.13902600  | 5.16440600 | H |
| H-H_  | 0 | -7.46592900 | 1.47176900  | 5.62344400 | H |
| H-H_  | 0 | -6.04570200 | 0.42442300  | 5.85602800 | H |
| H-H_  | 0 | -5.85435800 | 2.01372800  | 5.07664500 | H |

**<sup>32</sup>**

|       |   |             |             |             |   |
|-------|---|-------------|-------------|-------------|---|
| C-C_R | 0 | 5.65362000  | 1.52203900  | 2.51009400  | L |
| C-C_R | 0 | -4.79723600 | -3.69906800 | 0.55910800  | L |
| C-C_R | 0 | -3.93669100 | 4.69342700  | 1.11775000  | L |
| C-C_R | 0 | 1.61875200  | -5.56228600 | 1.00997500  | L |
| C-C_3 | 0 | 3.59367200  | 4.61706500  | -2.12186600 | L |
| C-C_3 | 0 | -2.67955200 | 2.43864700  | -4.39803400 | L |
| C-C_3 | 0 | -0.65420100 | -4.21838400 | -3.83539200 | L |
| C-C_3 | 0 | 5.69439700  | -2.12914800 | -1.58695800 | L |
| C-C_3 | 0 | -2.61663000 | 1.18137100  | -5.29866200 | L |
| C-C_3 | 0 | 4.08493400  | 5.98199400  | -1.58296300 | L |
| C-C_3 | 0 | 6.88055400  | -2.79208800 | -0.84633800 | L |
| C-C_3 | 0 | -1.34086400 | -3.38428300 | -4.94197500 | L |
| C-C_3 | 0 | 4.82175200  | 3.85380400  | -2.66969000 | L |
| C-C_3 | 0 | 5.22895400  | -3.09758600 | -2.69893200 | L |
| C-C_3 | 0 | -1.64827800 | 3.47856900  | -4.89425000 | L |
| C-C_3 | 0 | -1.35676500 | -5.59611600 | -3.77421000 | L |
| C-C_3 | 0 | -4.09094400 | 3.05144400  | -4.56611400 | L |
| C-C_3 | 0 | 6.22739000  | -0.82882100 | -2.23471000 | L |
| C-C_3 | 0 | 0.82044100  | -4.47465100 | -4.22957700 | L |
| C-C_3 | 0 | 2.61359100  | 4.90749600  | -3.28386000 | L |
| C-C_R | 0 | -0.02858800 | -2.20001500 | -2.22461200 | H |
| C-C_R | 0 | 3.33028300  | -1.04274700 | -1.03363100 | H |

|       |   |             |             |             |   |
|-------|---|-------------|-------------|-------------|---|
| C-C_R | 0 | 2.18868800  | 2.51684600  | -1.29930100 | H |
| C-C_R | 0 | -1.16991000 | 1.33514400  | -2.51135800 | H |
| C-C_3 | 0 | -0.74070000 | -3.54282300 | -2.41492200 | L |
| C-C_3 | 0 | 4.56440900  | -1.80346400 | -0.53903400 | L |
| C-C_3 | 0 | 2.86135600  | 3.84978400  | -0.95799200 | L |
| C-C_3 | 0 | -2.47182800 | 2.05466100  | -2.88546700 | L |
| C-C_R | 0 | -3.07619800 | -2.38815200 | -2.26263400 | L |
| C-C_R | 0 | 4.20243000  | -3.18463700 | 1.60878800  | L |
| C-C_R | 0 | 3.48622700  | 4.18085000  | 1.52254500  | L |
| C-C_R | 0 | -1.64746900 | 4.13430200  | -1.55337700 | L |
| C-C_R | 0 | -4.17093900 | -2.42943700 | -1.29770900 | L |
| C-C_R | 0 | 3.22536300  | -4.18900800 | 2.02098100  | L |
| C-C_R | 0 | 4.20939800  | 3.37919200  | 2.50638300  | L |
| C-C_R | 0 | -2.07419200 | 4.75282900  | -0.30329700 | L |
| C-C_R | 0 | -3.95511100 | -3.44162300 | -0.45758400 | L |
| C-C_R | 0 | 2.60742800  | -4.65078200 | 0.93425300  | L |
| C-C_R | 0 | 4.90842900  | 2.44270400  | 1.86173800  | L |
| C-C_R | 0 | -3.29416700 | 4.30807900  | -0.00497300 | L |
| C-C_R | 0 | -2.70870900 | -4.10452300 | -0.83187800 | L |
| C-C_R | 0 | 3.14817100  | -3.96529300 | -0.23510300 | L |
| C-C_R | 0 | 4.66875700  | 2.59348400  | 0.42951700  | L |
| C-C_R | 0 | -3.71063700 | 3.37453000  | -1.04824800 | L |
| C-C_R | 0 | -5.23958100 | -1.61399500 | -1.17062600 | L |
| C-C_R | 0 | 2.89429800  | -4.60528300 | 3.25826400  | L |
| C-C_R | 0 | 4.20289800  | 3.46315100  | 3.84917200  | L |
| C-C_R | 0 | -1.42009100 | 5.60424100  | 0.50685600  | L |
| C-C_R | 0 | -6.12521900 | -1.84053600 | -0.16598100 | L |
| C-C_R | 0 | 1.86851500  | -5.56641300 | 3.39018800  | L |
| C-C_R | 0 | 4.97148200  | 2.52987100  | 4.57133000  | L |
| C-C_R | 0 | -2.07443000 | 6.02311100  | 1.68621600  | L |
| C-C_R | 0 | -5.92925700 | -2.86727100 | 0.70329600  | L |
| C-C_R | 0 | 1.24148500  | -6.03717100 | 2.28443100  | L |
| C-C_R | 0 | 5.70221600  | 1.54916400  | 3.86310300  | L |
| C-C_R | 0 | -3.32124300 | 5.55808600  | 1.96542400  | L |
| F-F_  | 0 | -5.42691200 | -0.58065400 | -2.02990500 | L |
| F-F_  | 0 | 3.52263900  | -4.11096400 | 4.35413100  | L |
| F-F_  | 0 | 3.47758300  | 4.41228700  | 4.49188300  | L |
| F-F_  | 0 | -0.17341600 | 6.04631700  | 0.20624500  | L |
| F-F_  | 0 | -7.20464700 | -1.03131800 | -0.02316400 | L |
| F-F_  | 0 | 1.50818200  | -6.01025300 | 4.62014500  | L |
| F-F_  | 0 | 5.00414700  | 2.56754900  | 5.92641600  | L |
| F-F_  | 0 | -1.45882500 | 6.88252500  | 2.53599900  | L |
| F-F_  | 0 | -6.80936200 | -3.08873300 | 1.71081400  | L |
| F-F_  | 0 | 0.24953100  | -6.95489500 | 2.40044100  | L |

|      |   |             |             |             |   |
|------|---|-------------|-------------|-------------|---|
| F-F_ | 0 | 6.44418800  | 0.63585100  | 4.53770000  | L |
| F-F_ | 0 | -3.95255300 | 5.95672300  | 3.09821800  | L |
| F-F_ | 0 | -4.56773000 | -4.71937300 | 1.42275400  | L |
| F-F_ | 0 | 0.99558000  | -6.01375600 | -0.10699000 | L |
| F-F_ | 0 | 6.34691200  | 0.58192000  | 1.81981500  | L |
| F-F_ | 0 | -5.17988900 | 4.22918700  | 1.39609700  | L |
| H-H_ | 0 | 7.72180300  | -2.99334600 | -1.54482500 | L |
| H-H_ | 0 | -1.21110600 | -3.87522500 | -5.93074200 | L |
| H-H_ | 0 | -2.87979200 | 1.43798100  | -6.34776300 | L |
| H-H_ | 0 | 4.56743500  | 6.57647300  | -2.38910400 | L |
| H-H_ | 0 | 6.57951100  | -3.76143600 | -0.39441300 | L |
| H-H_ | 0 | 4.83196800  | 5.84704000  | -0.77165400 | L |
| H-H_ | 0 | -0.91881700 | -2.36403400 | -5.02245200 | L |
| H-H_ | 0 | -3.33561600 | 0.41125000  | -4.94659900 | L |
| H-H_ | 0 | 7.25634200  | -2.13250500 | -0.03417700 | L |
| H-H_ | 0 | 3.23598300  | 6.57459800  | -1.17810500 | L |
| H-H_ | 0 | -2.43214600 | -3.30208100 | -4.76107500 | L |
| H-H_ | 0 | -1.60508100 | 0.73148300  | -5.32289000 | L |
| H-H_ | 0 | 6.04196100  | -3.25112200 | -3.44123000 | L |
| H-H_ | 0 | 5.27557100  | 4.41195700  | -3.51708200 | L |
| H-H_ | 0 | -1.82140900 | 3.71129500  | -5.96727000 | L |
| H-H_ | 0 | -1.26877900 | -6.12999700 | -4.74544100 | L |
| H-H_ | 0 | 4.34865500  | -2.71328400 | -3.24927500 | L |
| H-H_ | 0 | 4.55721800  | 2.84584800  | -3.04330000 | L |
| H-H_ | 0 | -0.60685600 | 3.11476900  | -4.80009800 | L |
| H-H_ | 0 | -2.43929500 | -5.48522800 | -3.55016100 | L |
| H-H_ | 0 | 4.98001000  | -4.09469500 | -2.28145100 | L |
| H-H_ | 0 | 5.60612900  | 3.74972400  | -1.89208000 | L |
| H-H_ | 0 | -1.74081100 | 4.43039600  | -4.33138200 | L |
| H-H_ | 0 | -0.90241300 | -6.23515200 | -2.98614000 | L |
| H-H_ | 0 | 3.09908400  | 5.54205200  | -4.05676400 | L |
| H-H_ | 0 | 7.09004600  | -1.04779600 | -2.90077300 | L |
| H-H_ | 0 | -4.29705100 | 3.28719700  | -5.63287200 | L |
| H-H_ | 0 | 0.87785800  | -5.04743900 | -5.18056500 | L |
| H-H_ | 0 | 1.71721700  | 5.44954100  | -2.91415300 | L |
| H-H_ | 0 | 6.57425200  | -0.11712900 | -1.45567100 | L |
| H-H_ | 0 | 1.33791500  | -5.06760300 | -3.44570800 | L |
| H-H_ | 0 | -4.19001100 | 3.99619700  | -3.98997600 | L |
| H-H_ | 0 | 2.27896000  | 3.98045200  | -3.78955000 | L |
| H-H_ | 0 | -4.87192700 | 2.34412700  | -4.21171700 | L |
| H-H_ | 0 | 1.38251000  | -3.53339000 | -4.38611000 | L |
| H-H_ | 0 | 5.45916100  | -0.32529900 | -2.85381300 | L |
| H-H_ | 0 | -0.21521000 | -4.23673200 | -1.72261200 | L |
| H-H_ | 0 | 5.03612700  | -1.11447000 | 0.19594000  | L |

|         |   |             |             |             |   |
|---------|---|-------------|-------------|-------------|---|
| H-H_    | 0 | 2.02154000  | 4.51253700  | -0.65140100 | L |
| H-H_    | 0 | -3.27304900 | 1.31971300  | -2.64760600 | L |
| N-N_R   | 0 | -2.13705500 | -3.42882000 | -1.95835600 | L |
| N-N_R   | 0 | 4.13480100  | -3.01188900 | 0.18752000  | L |
| N-N_R   | 0 | 3.74333300  | 3.66857500  | 0.20912200  | L |
| N-N_R   | 0 | -2.66047500 | 3.22667200  | -2.01174300 | L |
| O-O_R   | 0 | -0.03910100 | -1.76128900 | -1.02035500 | H |
| O-O_R   | 0 | 2.53183000  | -0.66818100 | -0.10051900 | H |
| O-O_R   | 0 | 1.46082000  | 2.02985200  | -0.35965500 | H |
| O-O_R   | 0 | -1.10450100 | 0.93984700  | -1.28980200 | H |
| O-O_R   | 0 | 0.50577000  | -1.60881100 | -3.22131600 | H |
| O-O_R   | 0 | 3.15699200  | -0.84434000 | -2.28114300 | H |
| O-O_R   | 0 | 2.38687000  | 1.96950500  | -2.43339500 | H |
| O-O_R   | 0 | -0.25335300 | 1.18803500  | -3.38301200 | H |
| O-O_R   | 0 | -2.79402900 | -1.38191800 | -2.96438700 | L |
| O-O_R   | 0 | 4.69850500  | -2.32601700 | 2.38665300  | L |
| O-O_R   | 0 | 2.49704600  | 4.91105400  | 1.79928200  | L |
| O-O_R   | 0 | -0.46077700 | 4.12808300  | -1.97352800 | L |
| O-O_R   | 0 | -2.04483500 | -4.84664000 | -0.05957000 | L |
| O-O_R   | 0 | 2.54691100  | -3.89347500 | -1.33887500 | L |
| O-O_R   | 0 | 4.88904800  | 1.68608700  | -0.41490400 | L |
| O-O_R   | 0 | -4.68381800 | 2.58039900  | -0.95021100 | L |
| Rh-     | 0 | 0.68031400  | 0.12958700  | -0.58160000 | H |
| Rh-     | 0 | 1.46401300  | 0.17719700  | -2.86445700 | H |
| N-N_3   | 0 | 0.08553000  | -0.05469600 | 1.26764000  | H |
| S-S_3+6 | 0 | -0.43978300 | -1.32554900 | 2.16761500  | H |
| O-O_2   | 0 | 0.29380900  | -2.56877400 | 1.87656100  | H |
| O-O_R   | 0 | -1.98573800 | -1.58373100 | 1.45175200  | H |
| O-O_2   | 0 | -0.63925900 | -0.86399500 | 3.55431000  | H |
| C-C_R   | 0 | -3.09473100 | -0.99391300 | 2.05038200  | H |
| C-C_R   | 0 | -3.70353300 | 0.10080000  | 1.42141800  | H |
| C-C_R   | 0 | -3.65651500 | -1.55739400 | 3.20880200  | H |
| C-C_R   | 0 | -4.89240300 | 0.61859600  | 1.95057700  | H |
| H-H_    | 0 | -3.24136500 | 0.52590400  | 0.52802200  | H |
| C-C_R   | 0 | -4.84614000 | -1.02914600 | 3.71344200  | H |
| H-H_    | 0 | -3.17056000 | -2.41138700 | 3.68380400  | H |
| C-C_R   | 0 | -5.49759100 | 0.06595400  | 3.09949100  | H |
| H-H_    | 0 | -5.35655100 | 1.46764600  | 1.44764600  | H |
| H-H_    | 0 | -5.27868500 | -1.48884300 | 4.60609500  | H |
| C-C_3   | 0 | -6.81445200 | 0.60435100  | 3.69177600  | H |
| C-C_3   | 0 | -7.88105800 | -0.52293400 | 3.68627100  | H |
| H-H_    | 0 | -7.55021800 | -1.40780200 | 4.25293000  | H |
| H-H_    | 0 | -8.81794400 | -0.16214400 | 4.14427200  | H |
| H-H_    | 0 | -8.10821300 | -0.84691200 | 2.65756200  | H |

|       |   |             |            |            |   |
|-------|---|-------------|------------|------------|---|
| C-C_3 | 0 | -7.37607000 | 1.79942900 | 2.89202700 | H |
| H-H_  | 0 | -8.32559100 | 2.13242400 | 3.34250400 | H |
| H-H_  | 0 | -6.68701300 | 2.65938200 | 2.90362000 | H |
| H-H_  | 0 | -7.58389500 | 1.53288600 | 1.84222100 | H |
| C-C_3 | 0 | -6.56550200 | 1.07165900 | 5.15075500 | H |
| H-H_  | 0 | -7.49957800 | 1.46071400 | 5.59115500 | H |
| H-H_  | 0 | -6.21066600 | 0.24905000 | 5.79193300 | H |
| H-H_  | 0 | -5.80995300 | 1.87368600 | 5.18470900 | H |

# **<sup>1</sup>INT1**

|       |   |             |             |             |   |
|-------|---|-------------|-------------|-------------|---|
| C-C_R | 0 | 5.84008900  | -1.35992700 | 0.42745800  | L |
| C-C_R | 0 | -5.82528100 | 3.56256800  | -1.72768000 | L |
| C-C_R | 0 | -2.88299700 | -4.45519900 | -3.40543300 | L |
| C-C_R | 0 | 1.11272000  | 5.78236200  | 0.73599300  | L |
| C-C_3 | 0 | 1.98509600  | -4.95104900 | 3.07632600  | L |
| C-C_3 | 0 | -4.75547400 | -3.48794800 | 2.34515900  | L |
| C-C_3 | 0 | -3.34806400 | 3.39739300  | 3.70101200  | L |
| C-C_3 | 0 | 3.36619900  | 1.81009800  | 4.46560900  | L |
| C-C_3 | 0 | -5.28565900 | -2.43880600 | 3.35212300  | L |
| C-C_3 | 0 | 2.79824900  | -6.19988300 | 2.65883800  | L |
| C-C_3 | 0 | 4.70353900  | 2.58794600  | 4.50963900  | L |
| C-C_3 | 0 | -4.34210000 | 2.39828600  | 4.33826000  | L |
| C-C_3 | 0 | 2.75243500  | -4.24614900 | 4.21925500  | L |
| C-C_3 | 0 | 2.32809700  | 2.60625400  | 5.29094700  | L |
| C-C_3 | 0 | -3.93162000 | -4.55368200 | 3.10399900  | L |
| C-C_3 | 0 | -4.07941200 | 4.75232400  | 3.54159200  | L |
| C-C_3 | 0 | -5.98717200 | -4.19067200 | 1.72516600  | L |
| C-C_3 | 0 | 3.61420100  | 0.43869700  | 5.13885300  | L |
| C-C_3 | 0 | -2.16213800 | 3.63186000  | 4.66703900  | L |
| C-C_3 | 0 | 0.62046800  | -5.45005700 | 3.60979300  | L |
| C-C_R | 0 | -1.96378100 | 1.66015900  | 2.24966000  | H |
| C-C_R | 0 | 1.67394500  | 0.79682200  | 2.68772700  | H |
| C-C_R | 0 | 0.91176100  | -2.78523000 | 1.97514500  | H |
| C-C_R | 0 | -2.71695400 | -1.95682100 | 1.59253600  | H |
| C-C_3 | 0 | -2.83714000 | 2.92206900  | 2.28784600  | L |
| C-C_3 | 0 | 2.93564400  | 1.62363000  | 2.96152100  | L |
| C-C_3 | 0 | 1.78406600  | -4.03325900 | 1.81189600  | L |
| C-C_3 | 0 | -3.93879100 | -2.79109600 | 1.19351100  | L |
| C-C_R | 0 | -4.62873900 | 1.57317800  | 0.96023100  | L |
| C-C_R | 0 | 3.69272300  | 3.37820000  | 1.22589300  | L |
| C-C_R | 0 | 3.53702100  | -4.03873500 | -0.09097400 | L |
| C-C_R | 0 | -2.36882800 | -4.56604000 | 0.11948000  | L |
| C-C_R | 0 | -5.41541300 | 1.80516200  | -0.24634600 | L |
| C-C_R | 0 | 3.09333300  | 4.54008900  | 0.57499300  | L |

|       |   |             |             |             |   |
|-------|---|-------------|-------------|-------------|---|
| C-C_R | 0 | 4.64554800  | -3.17162900 | -0.48208900 | L |
| C-C_R | 0 | -2.03533100 | -4.88799700 | -1.26371400 | L |
| C-C_R | 0 | -5.22730800 | 3.06792000  | -0.62945400 | L |
| C-C_R | 0 | 1.91013900  | 4.77713300  | 1.14317700  | L |
| C-C_R | 0 | 4.88319100  | -2.30890900 | 0.50925400  | L |
| C-C_R | 0 | -2.96047000 | -4.35628300 | -2.06105800 | L |
| C-C_R | 0 | -4.32550900 | 3.71389700  | 0.32136900  | L |
| C-C_R | 0 | 1.70374000  | 3.79991800  | 2.20775300  | L |
| C-C_R | 0 | 3.93829900  | -2.57706300 | 1.59028000  | L |
| C-C_R | 0 | -3.94327000 | -3.66685300 | -1.22973900 | L |
| C-C_R | 0 | -6.20778400 | 0.96041600  | -0.93933000 | L |
| C-C_R | 0 | 3.56021300  | 5.29431700  | -0.43747100 | L |
| C-C_R | 0 | 5.34774400  | -3.14745100 | -1.62906100 | L |
| C-C_R | 0 | -0.97715400 | -5.55207900 | -1.76255100 | L |
| C-C_R | 0 | -6.83399300 | 1.41307600  | -2.05619100 | L |
| C-C_R | 0 | 2.76195300  | 6.36332600  | -0.89958400 | L |
| C-C_R | 0 | 6.36624300  | -2.18401300 | -1.75776800 | L |
| C-C_R | 0 | -0.87935400 | -5.67462300 | -3.16584600 | L |
| C-C_R | 0 | -6.66387400 | 2.69823100  | -2.46580900 | L |
| C-C_R | 0 | 1.55907300  | 6.60394300  | -0.32197200 | L |
| C-C_R | 0 | 6.59682700  | -1.28334400 | -0.69329400 | L |
| C-C_R | 0 | -1.83627900 | -5.12189700 | -3.95769400 | L |
| F-F_  | 0 | -6.37441900 | -0.32285800 | -0.53211400 | L |
| F-F_  | 0 | 4.76298700  | 5.03362200  | -1.00681600 | L |
| F-F_  | 0 | 5.08578600  | -4.02044800 | -2.63350800 | L |
| F-F_  | 0 | -0.02982700 | -6.08150700 | -0.94894500 | L |
| F-F_  | 0 | -7.63014900 | 0.57733200  | -2.76897100 | L |
| F-F_  | 0 | 3.19670800  | 7.14274900  | -1.92085300 | L |
| F-F_  | 0 | 7.10840800  | -2.11748300 | -2.89021100 | L |
| F-F_  | 0 | 0.16931300  | -6.33362000 | -3.71869800 | L |
| F-F_  | 0 | -7.28896000 | 3.14820900  | -3.58218700 | L |
| F-F_  | 0 | 0.78270900  | 7.62534100  | -0.76187100 | L |
| F-F_  | 0 | 7.56413900  | -0.33867900 | -0.79991600 | L |
| F-F_  | 0 | -1.74213900 | -5.23147200 | -5.30666800 | L |
| F-F_  | 0 | -5.63188000 | 4.84730400  | -2.11699100 | L |
| F-F_  | 0 | -0.08934400 | 6.00408500  | 1.32463700  | L |
| F-F_  | 0 | 6.04174900  | -0.49118600 | 1.45022800  | L |
| F-F_  | 0 | -3.83292800 | -3.89564900 | -4.19624000 | L |
| H-H_  | 0 | 5.06952200  | 2.68962300  | 5.55451300  | L |
| H-H_  | 0 | -4.69115800 | 2.77694900  | 5.32332200  | L |
| H-H_  | 0 | -5.95963300 | -2.91590800 | 4.09636900  | L |
| H-H_  | 0 | 2.91706300  | -6.90022000 | 3.51410100  | L |
| H-H_  | 0 | 4.58619600  | 3.61240100  | 4.09615500  | L |
| H-H_  | 0 | 3.81557400  | -5.91851800 | 2.31201900  | L |

|       |   |             |             |            |   |
|-------|---|-------------|-------------|------------|---|
| H-H_  | 0 | -3.88740600 | 1.40447700  | 4.51315400 | L |
| H-H_  | 0 | -5.86470200 | -1.64935500 | 2.82726100 | L |
| H-H_  | 0 | 5.48505200  | 2.06108700  | 3.92022400 | L |
| H-H_  | 0 | 2.28849600  | -6.74460700 | 1.83468000 | L |
| H-H_  | 0 | -5.23867200 | 2.26754500  | 3.69718900 | L |
| H-H_  | 0 | -4.46901900 | -1.95468400 | 3.92227700 | L |
| H-H_  | 0 | 2.66051100  | 2.69175900  | 6.34816200 | L |
| H-H_  | 0 | 2.82431800  | -4.91484600 | 5.10425100 | L |
| H-H_  | 0 | -4.53066800 | -4.98378000 | 3.93566500 | L |
| H-H_  | 0 | -4.39182400 | 5.15364100  | 4.53025000 | L |
| H-H_  | 0 | 1.33334100  | 2.12076900  | 5.29766000 | L |
| H-H_  | 0 | 2.25312700  | -3.31515200 | 4.54975000 | L |
| H-H_  | 0 | -3.00745900 | -4.13265700 | 3.54531400 | L |
| H-H_  | 0 | -4.99583600 | 4.64438800  | 2.92349000 | L |
| H-H_  | 0 | 2.21353000  | 3.63790800  | 4.89947100 | L |
| H-H_  | 0 | 3.79000700  | -4.00157100 | 3.91267400 | L |
| H-H_  | 0 | -3.65337400 | -5.39335400 | 2.43440300 | L |
| H-H_  | 0 | -3.41742700 | 5.50365300  | 3.05898900 | L |
| H-H_  | 0 | 0.76571500  | -6.18343900 | 4.43247000 | L |
| H-H_  | 0 | 4.02090000  | 0.57393700  | 6.16454900 | L |
| H-H_  | 0 | -6.61886300 | -4.65376500 | 2.51419100 | L |
| H-H_  | 0 | -2.52100800 | 4.04853200  | 5.63311600 | L |
| H-H_  | 0 | 0.04538700  | -5.95420500 | 2.80422100 | L |
| H-H_  | 0 | 4.35152900  | -0.15469100 | 4.55746900 | L |
| H-H_  | 0 | -1.44280300 | 4.35742600  | 4.23177800 | L |
| H-H_  | 0 | -5.67947400 | -4.99743300 | 1.02595700 | L |
| H-H_  | 0 | 0.00350400  | -4.62551700 | 4.01755100 | L |
| H-H_  | 0 | -6.61335400 | -3.46405100 | 1.16321500 | L |
| H-H_  | 0 | -1.61849900 | 2.69620900  | 4.90224700 | L |
| H-H_  | 0 | 2.68516400  | -0.15571300 | 5.23754900 | L |
| H-H_  | 0 | -2.17508600 | 3.73441400  | 1.91115400 | L |
| H-H_  | 0 | 3.75887100  | 1.05111100  | 2.47714400 | L |
| H-H_  | 0 | 1.23726000  | -4.66150100 | 1.07408700 | L |
| H-H_  | 0 | -4.63715000 | -2.05537000 | 0.73690100 | L |
| N-N_R | 0 | -3.96058600 | 2.78139900  | 1.34527600 | L |
| N-N_R | 0 | 2.83352100  | 2.92063200  | 2.27319300 | L |
| N-N_R | 0 | 3.07392100  | -3.65563900 | 1.20857800 | L |
| N-N_R | 0 | -3.55449600 | -3.75634200 | 0.14718500 | L |
| O-O_R | 0 | -1.38515500 | 1.43149800  | 1.12584200 | H |
| O-O_R | 0 | 1.42922800  | 0.57526100  | 1.44572100 | H |
| O-O_R | 0 | 0.65864300  | -2.17267500 | 0.87712100 | H |
| O-O_R | 0 | -2.15064400 | -1.34353800 | 0.61763400 | H |
| O-O_R | 0 | -1.88085900 | 0.92205300  | 3.28599100 | H |
| O-O_R | 0 | 0.95291900  | 0.39629800  | 3.65723200 | H |

|       |   |             |             |             |   |
|-------|---|-------------|-------------|-------------|---|
| O-O_R | 0 | 0.51090300  | -2.43011600 | 3.13240900  | H |
| O-O_R | 0 | -2.33073300 | -1.92111200 | 2.80670300  | H |
| O-O_R | 0 | -4.72208200 | 0.55786800  | 1.69846600  | L |
| O-O_R | 0 | 4.90186600  | 3.04017000  | 1.12255700  | L |
| O-O_R | 0 | 2.84573500  | -4.71089300 | -0.90223600 | L |
| O-O_R | 0 | -1.54208400 | -4.61686100 | 1.06744300  | L |
| O-O_R | 0 | -3.70959100 | 4.79194500  | 0.10645200  | L |
| O-O_R | 0 | 0.58830200  | 3.54421600  | 2.73167400  | L |
| O-O_R | 0 | 3.65597500  | -1.75107600 | 2.49739800  | L |
| O-O_R | 0 | -4.76853500 | -2.81969600 | -1.66410100 | L |
| Rh-   | 0 | -0.34255300 | -0.36859500 | 0.89905200  | H |
| Rh-   | 0 | -0.69666400 | -0.76104200 | 3.26182800  | H |
| N-N_R | 0 | -0.15914500 | -0.10096200 | -1.02594900 | H |
| S-S_R | 0 | 0.57977700  | -1.08088000 | -2.10634100 | H |
| O-O_R | 0 | 0.63232300  | -0.41820500 | -3.42603800 | H |
| O-O_R | 0 | 2.22498500  | -1.02664900 | -1.45155100 | H |
| O-O_R | 0 | 0.19185400  | -2.50032200 | -2.00711900 | H |
| C-C_R | 0 | 3.17987600  | -0.29940000 | -2.11298900 | H |
| C-C_R | 0 | 3.83519200  | 0.72142800  | -1.39749600 | H |
| C-C_R | 0 | 3.57966800  | -0.60645400 | -3.43265700 | H |
| C-C_R | 0 | 4.88584500  | 1.42013700  | -1.99456000 | H |
| H-H_  | 0 | 3.49458300  | 0.94305300  | -0.38502600 | H |
| C-C_R | 0 | 4.63524800  | 0.10112300  | -4.00524700 | H |
| H-H_  | 0 | 3.07759200  | -1.40569400 | -3.97879100 | H |
| C-C_R | 0 | 5.31671000  | 1.13022500  | -3.30997500 | H |
| H-H_  | 0 | 5.37834700  | 2.20823900  | -1.42395700 | H |
| H-H_  | 0 | 4.94082700  | -0.16045400 | -5.02162900 | H |
| C-C_3 | 0 | 6.46935000  | 1.88732000  | -3.99273100 | H |
| C-C_3 | 0 | 5.92968000  | 2.58711500  | -5.26967500 | H |
| H-H_  | 0 | 5.51378900  | 1.86533600  | -5.99047800 | H |
| H-H_  | 0 | 6.74370100  | 3.13483800  | -5.77450300 | H |
| H-H_  | 0 | 5.13456300  | 3.30817600  | -5.01891200 | H |
| C-C_3 | 0 | 7.09328500  | 2.96281200  | -3.07722100 | H |
| H-H_  | 0 | 7.92020800  | 3.46381900  | -3.60662900 | H |
| H-H_  | 0 | 7.50856300  | 2.52719000  | -2.15303300 | H |
| H-H_  | 0 | 6.36292400  | 3.73982100  | -2.79833900 | H |
| C-C_3 | 0 | 7.58585100  | 0.88387600  | -4.38845800 | H |
| H-H_  | 0 | 8.39813400  | 1.41194600  | -4.91627900 | H |
| H-H_  | 0 | 7.21320800  | 0.09089200  | -5.05596400 | H |
| H-H_  | 0 | 8.01742700  | 0.40070300  | -3.49693600 | H |
| C-C_R | 0 | -3.15760700 | 2.14525500  | -3.43470100 | H |
| C-C_R | 0 | -3.92485300 | 2.63573000  | -4.51089900 | H |
| C-C_R | 0 | -4.71910500 | 1.77728200  | -5.28499400 | H |
| C-C_R | 0 | -4.76205200 | 0.40505900  | -4.99439500 | H |



|       |   |             |             |             |   |
|-------|---|-------------|-------------|-------------|---|
| C-C_R | 0 | -4.00546200 | -0.09787700 | -3.92495100 | H |
| C-C_R | 0 | -3.21705800 | 0.76417500  | -3.15134800 | H |
| H-H_  | 0 | -3.90942900 | 3.70766900  | -4.73365600 | H |
| H-H_  | 0 | -5.31162000 | 2.18239300  | -6.11103000 | H |
| H-H_  | 0 | -5.38546700 | -0.26603800 | -5.59247900 | H |
| H-H_  | 0 | -4.03166300 | -1.16509700 | -3.68996800 | H |
| H-H_  | 0 | -2.64023700 | 0.36791600  | -2.31014700 | H |
| C-C_3 | 0 | -2.29140600 | 3.06197800  | -2.59469500 | H |
| H-H_  | 0 | -2.72828400 | 4.07881600  | -2.58080000 | H |
| H-H_  | 0 | -2.29346500 | 2.69593200  | -1.55313300 | H |
| C-C_3 | 0 | -0.80722800 | 3.16824400  | -3.04611300 | H |
| H-H_  | 0 | -0.40694400 | 2.14056400  | -3.09832200 | H |
| C-C_3 | 0 | -0.00245500 | 3.94196400  | -1.98800000 | H |
| H-H_  | 0 | -0.38610300 | 4.97276000  | -1.87851800 | H |
| H-H_  | 0 | 1.06288800  | 4.01031300  | -2.26726300 | H |
| H-H_  | 0 | -0.06354000 | 3.45051600  | -1.00279500 | H |
| C-C_3 | 0 | -0.66024900 | 3.81349500  | -4.43349400 | H |
| H-H_  | 0 | -1.03917800 | 4.85225100  | -4.43062200 | H |
| H-H_  | 0 | -1.21496300 | 3.25268600  | -5.20265000 | H |
| H-H_  | 0 | 0.39915900  | 3.84664800  | -4.73995300 | H |

# **<sup>1</sup>TS1**

|       |   |             |             |             |   |
|-------|---|-------------|-------------|-------------|---|
| C-C_R | 0 | -5.93656300 | -1.12559500 | -0.58944000 | L |
| C-C_R | 0 | 5.62824700  | 3.27286000  | 2.38811500  | L |
| C-C_R | 0 | 2.97638900  | -5.22542800 | 2.67314200  | L |
| C-C_R | 0 | -0.89074200 | 5.94065400  | 0.12878400  | L |
| C-C_3 | 0 | -2.04901200 | -4.22339600 | -3.76018400 | L |
| C-C_3 | 0 | 4.68787100  | -2.97252800 | -2.69381900 | L |
| C-C_3 | 0 | 3.43104600  | 3.99752300  | -3.17298400 | L |
| C-C_3 | 0 | -3.35014800 | 2.65651600  | -4.15668800 | L |
| C-C_3 | 0 | 5.23881600  | -1.76972600 | -3.49661900 | L |
| C-C_3 | 0 | -2.87069800 | -5.51778300 | -3.54789200 | L |
| C-C_3 | 0 | -4.67725100 | 3.45091300  | -4.09622400 | L |
| C-C_3 | 0 | 4.40070000  | 3.06300800  | -3.93432500 | L |
| C-C_3 | 0 | -2.80775700 | -3.34260400 | -4.78045800 | L |
| C-C_3 | 0 | -2.30691800 | 3.53160900  | -4.89016900 | L |
| C-C_3 | 0 | 3.87009700  | -3.88640300 | -3.63632600 | L |
| C-C_3 | 0 | 4.19897400  | 5.29716600  | -2.83025700 | L |
| C-C_3 | 0 | 5.90738300  | -3.78159300 | -2.18998100 | L |
| C-C_3 | 0 | -3.62103400 | 1.37787900  | -4.98573500 | L |
| C-C_3 | 0 | 2.26034100  | 4.39244600  | -4.10456000 | L |
| C-C_3 | 0 | -0.68454000 | -4.64170000 | -4.35984700 | L |
| C-C_R | 0 | 2.00699500  | 2.11028900  | -1.96449900 | H |
| C-C_R | 0 | -1.66343800 | 1.41661400  | -2.51783300 | H |

|       |   |             |             |             |   |
|-------|---|-------------|-------------|-------------|---|
| C-C_R | 0 | -0.97737400 | -2.25618200 | -2.33426000 | H |
| C-C_R | 0 | 2.64736400  | -1.57568800 | -1.71894100 | H |
| C-C_3 | 0 | 2.89389400  | 3.35715200  | -1.83715600 | L |
| C-C_3 | 0 | -2.91341000 | 2.28892900  | -2.68853200 | L |
| C-C_3 | 0 | -1.85128700 | -3.51461300 | -2.36700700 | L |
| C-C_3 | 0 | 3.85640300  | -2.48054700 | -1.44945700 | L |
| C-C_R | 0 | 4.76889900  | 1.88891300  | -0.76920500 | L |
| C-C_R | 0 | -3.61217600 | 3.81267500  | -0.72518300 | L |
| C-C_R | 0 | -3.65144500 | -3.86881200 | -0.54101600 | L |
| C-C_R | 0 | 2.25266100  | -4.40090500 | -0.71722100 | L |
| C-C_R | 0 | 5.44550500  | 1.88017900  | 0.52314500  | L |
| C-C_R | 0 | -2.92666200 | 4.78104200  | 0.12457500  | L |
| C-C_R | 0 | -4.77457600 | -3.09185000 | -0.02295000 | L |
| C-C_R | 0 | 1.99038200  | -5.07075600 | 0.55196600  | L |
| C-C_R | 0 | 5.16424400  | 3.02239400  | 1.15069800  | L |
| C-C_R | 0 | -1.76176100 | 5.08964900  | -0.44597500 | L |
| C-C_R | 0 | -4.97934600 | -2.04689900 | -0.82953700 | L |
| C-C_R | 0 | 2.95984800  | -4.75137100 | 1.40938900  | L |
| C-C_R | 0 | 4.28143000  | 3.81944000  | 0.30051400  | L |
| C-C_R | 0 | -1.63489200 | 4.32953200  | -1.68656400 | L |
| C-C_R | 0 | -3.99913200 | -2.10074800 | -1.91108600 | L |
| C-C_R | 0 | 3.87608900  | -3.83026600 | 0.74201600  | L |
| C-C_R | 0 | 6.20106700  | 0.91928700  | 1.09594400  | L |
| C-C_R | 0 | -3.29780000 | 5.29833700  | 1.31073000  | L |
| C-C_R | 0 | -5.51424900 | -3.29253200 | 1.08221400  | L |
| C-C_R | 0 | 0.97322800  | -5.87414300 | 0.91027700  | L |
| C-C_R | 0 | 6.69866600  | 1.12886500  | 2.34198300  | L |
| C-C_R | 0 | -2.42169400 | 6.20180200  | 1.95069300  | L |
| C-C_R | 0 | -6.53466400 | -2.36621400 | 1.36896500  | L |
| C-C_R | 0 | 0.96918600  | -6.38093100 | 2.22837400  | L |
| C-C_R | 0 | 6.43256600  | 2.28723200  | 3.00177400  | L |
| C-C_R | 0 | -1.23896400 | 6.51910400  | 1.36863000  | L |
| C-C_R | 0 | -6.72842400 | -1.26817800 | 0.50018700  | L |
| C-C_R | 0 | 1.97390500  | -6.04630400 | 3.08140800  | L |
| F-F_  | 0 | 6.45450800  | -0.24280400 | 0.44294600  | L |
| F-F_  | 0 | -4.47960400 | 4.95861300  | 1.88303800  | L |
| F-F_  | 0 | -5.28573400 | -4.35029900 | 1.89988100  | L |
| F-F_  | 0 | -0.01737700 | -6.18843100 | 0.03841400  | L |
| F-F_  | 0 | 7.45625600  | 0.17276600  | 2.93556400  | L |
| F-F_  | 0 | -2.76070500 | 6.74363000  | 3.14694600  | L |
| F-F_  | 0 | -7.31462200 | -2.52375700 | 2.46639300  | L |
| F-F_  | 0 | -0.03418200 | -7.19563800 | 2.63964100  | L |
| F-F_  | 0 | 6.92115300  | 2.49014000  | 4.25060300  | L |
| F-F_  | 0 | -0.38612800 | 7.37853400  | 1.97980000  | L |

|      |   |             |             |             |   |
|------|---|-------------|-------------|-------------|---|
| F-F_ | 0 | -7.69669600 | -0.35583000 | 0.76341600  | L |
| F-F_ | 0 | 1.97158100  | -6.52928600 | 4.34921800  | L |
| F-F_ | 0 | 5.32386500  | 4.42568900  | 3.03450700  | L |
| F-F_ | 0 | 0.29815600  | 6.22744200  | -0.45848900 | L |
| F-F_ | 0 | -6.10280900 | -0.06782500 | -1.42308000 | L |
| F-F_ | 0 | 3.97127300  | -4.88048200 | 3.52869300  | L |
| H-H_ | 0 | -5.04906200 | 3.68128300  | -5.11835000 | L |
| H-H_ | 0 | 4.75859800  | 3.55482000  | -4.86469100 | L |
| H-H_ | 0 | 5.90625300  | -2.11792700 | -4.31456100 | L |
| H-H_ | 0 | -2.98299300 | -6.07770300 | -4.50179500 | L |
| H-H_ | 0 | -4.54346500 | 4.41674200  | -3.56367300 | L |
| H-H_ | 0 | -3.89108900 | -5.28875000 | -3.17292500 | L |
| H-H_ | 0 | 3.92200900  | 2.11048900  | -4.23186800 | L |
| H-H_ | 0 | 5.83159300  | -1.09931700 | -2.83868900 | L |
| H-H_ | 0 | -5.46158800 | 2.86751800  | -3.56677900 | L |
| H-H_ | 0 | -2.37125900 | -6.18520300 | -2.81242500 | L |
| H-H_ | 0 | 5.29493500  | 2.83059700  | -3.31996800 | L |
| H-H_ | 0 | 4.43302100  | -1.17535400 | -3.96958500 | L |
| H-H_ | 0 | -2.64451000 | 3.74524800  | -5.92742800 | L |
| H-H_ | 0 | -2.89106500 | -3.86866400 | -5.75608400 | L |
| H-H_ | 0 | 4.48651700  | -4.18830800 | -4.51062300 | L |
| H-H_ | 0 | 4.53752800  | 5.81389200  | -3.75462500 | L |
| H-H_ | 0 | -1.31874800 | 3.03775400  | -4.96119700 | L |
| H-H_ | 0 | -2.29536200 | -2.37965000 | -4.96868500 | L |
| H-H_ | 0 | 2.96565400  | -3.38380600 | -4.02977000 | L |
| H-H_ | 0 | 5.10162200  | 5.08154200  | -2.21969700 | L |
| H-H_ | 0 | -2.17680700 | 4.50845500  | -4.38063900 | L |
| H-H_ | 0 | -3.84040700 | -3.13067800 | -4.43518600 | L |
| H-H_ | 0 | 3.55926900  | -4.81694400 | -3.11833000 | L |
| H-H_ | 0 | 3.55179300  | 5.99874200  | -2.26043700 | L |
| H-H_ | 0 | -0.83033800 | -5.24009300 | -5.28526900 | L |
| H-H_ | 0 | -4.03068600 | 1.63927000  | -5.98553200 | L |
| H-H_ | 0 | 6.55052600  | -4.10038200 | -3.03898000 | L |
| H-H_ | 0 | 2.63914600  | 4.92063100  | -5.00635800 | L |
| H-H_ | 0 | -0.11452500 | -5.26569300 | -3.63906400 | L |
| H-H_ | 0 | -4.36425900 | 0.73012400  | -4.47418500 | L |
| H-H_ | 0 | 1.55962700  | 5.07694400  | -3.58127500 | L |
| H-H_ | 0 | 5.58621600  | -4.69862300 | -1.65122800 | L |
| H-H_ | 0 | -0.06185900 | -3.76875500 | -4.63655700 | L |
| H-H_ | 0 | 6.52695500  | -3.17032600 | -1.49840900 | L |
| H-H_ | 0 | 1.69088300  | 3.51231200  | -4.46157100 | L |
| H-H_ | 0 | -2.70115200 | 0.78656300  | -5.15998300 | L |
| H-H_ | 0 | 2.23313800  | 4.12522100  | -1.37568300 | L |
| H-H_ | 0 | -3.74186500 | 1.67153800  | -2.27397800 | L |

|         |   |             |             |             |   |
|---------|---|-------------|-------------|-------------|---|
| H-H_    | 0 | -1.30922600 | -4.24997100 | -1.73174400 | L |
| H-H_    | 0 | 4.55080700  | -1.84900100 | -0.85056900 | L |
| N-N_R   | 0 | 4.00127400  | 3.09249800  | -0.90160200 | L |
| N-N_R   | 0 | -2.79093100 | 3.49635000  | -1.85351200 | L |
| N-N_R   | 0 | -3.14501800 | -3.23600300 | -1.72071600 | L |
| N-N_R   | 0 | 3.44597400  | -3.61396300 | -0.60482600 | L |
| O-O_R   | 0 | 1.44591700  | 1.72039000  | -0.87287000 | H |
| O-O_R   | 0 | -1.42571300 | 1.05212400  | -1.30971900 | H |
| O-O_R   | 0 | -0.73886700 | -1.80391300 | -1.16039800 | H |
| O-O_R   | 0 | 2.08602200  | -1.09694600 | -0.66362000 | H |
| O-O_R   | 0 | 1.88841400  | 1.53395800  | -3.09056000 | H |
| O-O_R   | 0 | -0.95496900 | 1.12599100  | -3.53586900 | H |
| O-O_R   | 0 | -0.55624200 | -1.74384700 | -3.42417800 | H |
| O-O_R   | 0 | 2.27137400  | -1.36080900 | -2.91527800 | H |
| O-O_R   | 0 | 4.62006300  | 0.87860200  | -1.50459000 | L |
| O-O_R   | 0 | -4.61255000 | 3.13157900  | -0.37625000 | L |
| O-O_R   | 0 | -2.98999300 | -4.69812300 | 0.13914800  | L |
| O-O_R   | 0 | 1.40280800  | -4.25550700 | -1.63404300 | L |
| O-O_R   | 0 | 3.57217000  | 4.77552000  | 0.71372900  | L |
| O-O_R   | 0 | -0.54051700 | 4.12197000  | -2.27308500 | L |
| O-O_R   | 0 | -3.69694900 | -1.11912500 | -2.63901000 | L |
| O-O_R   | 0 | 5.02650300  | -3.53086700 | 1.15893100  | L |
| Rh-     | 0 | 0.32042100  | -0.04140500 | -0.86607200 | H |
| Rh-     | 0 | 0.66731600  | -0.11027400 | -3.27157200 | H |
| N-N_3   | 0 | -0.33662600 | 0.02038900  | 1.02761000  | H |
| S-S_3+6 | 0 | -0.46125200 | -1.42235300 | 1.91785400  | H |
| O-O_2   | 0 | -0.40589600 | -1.12344600 | 3.36279100  | H |
| O-O_R   | 0 | -2.10823000 | -1.70582500 | 1.48942100  | H |
| O-O_2   | 0 | 0.23746300  | -2.59702100 | 1.37843000  | H |
| C-C_R   | 0 | -3.07621900 | -0.98076400 | 2.18400400  | H |
| C-C_R   | 0 | -3.63406000 | 0.16449100  | 1.60047300  | H |
| C-C_R   | 0 | -3.54412800 | -1.45053400 | 3.42217700  | H |
| C-C_R   | 0 | -4.66748300 | 0.83628300  | 2.26664500  | H |
| H-H_    | 0 | -3.24483600 | 0.51830200  | 0.64387400  | H |
| C-C_R   | 0 | -4.58381100 | -0.76977300 | 4.06270400  | H |
| H-H_    | 0 | -3.10033400 | -2.34682200 | 3.85906100  | H |
| C-C_R   | 0 | -5.16855800 | 0.39117600  | 3.50787600  | H |
| H-H_    | 0 | -5.09021500 | 1.72743300  | 1.80167600  | H |
| H-H_    | 0 | -4.94095400 | -1.15529100 | 5.02172600  | H |
| C-C_3   | 0 | -6.28951500 | 1.13125000  | 4.26520400  | H |
| C-C_3   | 0 | -5.74170300 | 1.61273600  | 5.63532600  | H |
| H-H_    | 0 | -5.39927100 | 0.77113100  | 6.25852600  | H |
| H-H_    | 0 | -6.52755000 | 2.14807500  | 6.19569900  | H |
| H-H_    | 0 | -4.88924100 | 2.29885600  | 5.50030900  | H |

|       |   |             |             |            |   |
|-------|---|-------------|-------------|------------|---|
| C-C_3 | 0 | -6.80661600 | 2.36401400  | 3.49190100 | H |
| H-H_  | 0 | -7.61194900 | 2.85091600  | 4.06638500 | H |
| H-H_  | 0 | -7.22176800 | 2.08799200  | 2.50811800 | H |
| H-H_  | 0 | -6.01368200 | 3.11392200  | 3.33505300 | H |
| C-C_3 | 0 | -7.48747500 | 0.17435200  | 4.49965100 | H |
| H-H_  | 0 | -8.27045000 | 0.68156100  | 5.08922900 | H |
| H-H_  | 0 | -7.19057800 | -0.73346100 | 5.04846500 | H |
| H-H_  | 0 | -7.93448100 | -0.14048600 | 3.54299700 | H |
| C-C_R | 0 | 2.99972900  | 1.04369800  | 3.32462700 | H |
| C-C_R | 0 | 3.49170300  | 1.43142200  | 4.58752500 | H |
| C-C_R | 0 | 4.25319300  | 0.55190000  | 5.36923700 | H |
| C-C_R | 0 | 4.53011700  | -0.73978200 | 4.89907800 | H |
| C-C_R | 0 | 4.04508800  | -1.13846600 | 3.64451500 | H |
| C-C_R | 0 | 3.29350600  | -0.25372000 | 2.85900100 | H |
| H-H_  | 0 | 3.28719600  | 2.44296600  | 4.95415400 | H |
| H-H_  | 0 | 4.63366600  | 0.87801300  | 6.34166900 | H |
| H-H_  | 0 | 5.12381700  | -1.43121000 | 5.50376400 | H |
| H-H_  | 0 | 4.25470600  | -2.14476200 | 3.27661600 | H |
| H-H_  | 0 | 2.93905900  | -0.57258400 | 1.87425000 | H |
| C-C_3 | 0 | 2.19846300  | 2.01469100  | 2.48385400 | H |
| H-H_  | 0 | 2.48619700  | 3.04828600  | 2.76751300 | H |
| H-H_  | 0 | 2.45129800  | 1.90242600  | 1.41863600 | H |
| C-C_3 | 0 | 0.66118600  | 1.96188100  | 2.60108100 | H |
| H-H_  | 0 | 0.32255600  | 0.97769000  | 1.96494800 | H |
| C-C_3 | 0 | -0.02156000 | 3.08437100  | 1.82484500 | H |
| H-H_  | 0 | 0.10602000  | 4.03809900  | 2.37113300 | H |
| H-H_  | 0 | -1.10196800 | 2.89407200  | 1.73032700 | H |
| H-H_  | 0 | 0.40267300  | 3.19765800  | 0.81742300 | H |
| C-C_3 | 0 | 0.10590800  | 1.78773800  | 4.00406400 | H |
| H-H_  | 0 | 0.33958300  | 2.69444000  | 4.59722800 | H |
| H-H_  | 0 | 0.54120300  | 0.92240600  | 4.52061700 | H |
| H-H_  | 0 | -0.98824600 | 1.67269800  | 3.98510200 | H |

## <sup>1</sup>INT2

|       |   |             |             |             |   |
|-------|---|-------------|-------------|-------------|---|
| Rh-   | 0 | -0.47798900 | -0.43721600 | 0.86823200  | H |
| Rh-   | 0 | -1.04075800 | -1.06949900 | 3.14246800  | H |
| O-O_R | 0 | -1.45252000 | 1.37656300  | 1.23187100  | H |
| C-C_R | 0 | -2.08698200 | 1.52331700  | 2.33812100  | H |
| F-F_  | 0 | -6.78844900 | 0.02387700  | -0.34522400 | L |
| N-N_R | 0 | -3.99130100 | 2.81715200  | 1.48000200  | L |
| O-O_R | 0 | -2.11164500 | 0.67847400  | 3.29346500  | H |
| C-C_3 | 0 | -2.89168400 | 2.82292300  | 2.45940000  | L |
| F-F_  | 0 | -7.69647600 | 0.91806900  | -2.74573000 | L |
| O-O_R | 0 | -4.83030300 | 0.60768200  | 1.72212200  | L |

|       |   |             |             |             |   |
|-------|---|-------------|-------------|-------------|---|
| C-C_R | 0 | -4.87666800 | 1.73462000  | 1.16325000  | L |
| F-F_  | 0 | -6.87280300 | 3.32435100  | -3.70431800 | L |
| O-O_R | 0 | -3.35255300 | 4.67030500  | 0.14339700  | L |
| C-C_R | 0 | -5.10358700 | 3.17640900  | -0.56949200 | L |
| C-C_R | 0 | -4.16062500 | 3.73707300  | 0.39603200  | L |
| C-C_R | 0 | -6.38149700 | 1.22632600  | -0.82404000 | L |
| C-C_R | 0 | -6.83444600 | 1.67610200  | -2.02272000 | L |
| C-C_R | 0 | -6.42404900 | 2.87933000  | -2.50427300 | L |
| C-C_R | 0 | -5.52051900 | 3.66233600  | -1.75239100 | L |
| C-C_3 | 0 | -3.40856700 | 3.22289100  | 3.89336000  | L |
| C-C_3 | 0 | -4.47585700 | 2.24833500  | 4.44508000  | L |
| C-C_3 | 0 | -4.05030800 | 4.62904400  | 3.81472300  | L |
| C-C_3 | 0 | -2.23217300 | 3.31054900  | 4.89425000  | L |
| C-C_R | 0 | -5.52291700 | 1.99362400  | -0.11923200 | L |
| F-F_  | 0 | -5.08696700 | 4.86168500  | -2.21375800 | L |
| O-O_R | 0 | 0.63259800  | -0.07701300 | 3.80819400  | H |
| C-C_3 | 0 | 2.72447300  | 1.10540100  | 3.40213600  | L |
| F-F_  | 0 | 3.60933400  | 6.47637500  | -1.52759700 | L |
| O-O_R | 0 | 4.83538300  | 2.28856300  | 1.62895600  | L |
| C-C_R | 0 | 3.76601800  | 2.90760900  | 1.87530400  | L |
| F-F_  | 0 | 1.08583800  | 7.01114300  | -0.65842100 | L |
| O-O_R | 0 | 0.51342300  | 3.14777500  | 3.02520100  | L |
| C-C_R | 0 | 3.23897100  | 4.01902800  | 1.08787700  | L |
| C-C_R | 0 | 1.99939000  | 4.27481600  | 1.50510800  | L |
| C-C_R | 0 | 1.67448000  | 3.34515100  | 2.58217900  | L |
| C-C_R | 0 | 3.81073900  | 4.71518700  | 0.08743000  | L |
| C-C_R | 0 | 3.06424100  | 5.74721400  | -0.52220400 | L |
| C-C_R | 0 | 1.80431600  | 6.00891600  | -0.09475200 | L |
| C-C_R | 0 | 1.24534800  | 5.24209900  | 0.94992800  | L |
| C-C_3 | 0 | 3.00459400  | 1.16827300  | 4.94978500  | L |
| C-C_3 | 0 | 4.36860700  | 1.86219300  | 5.18230800  | L |
| C-C_3 | 0 | 1.92585600  | 1.97165600  | 5.71264600  | L |
| C-C_3 | 0 | 3.10867800  | -0.25487700 | 5.54957200  | L |
| F-F_  | 0 | -0.01688200 | 5.48261100  | 1.38529100  | L |
| O-O_R | 0 | 1.30460300  | 0.30710200  | 1.67268900  | H |
| C-C_R | 0 | 1.45065800  | 0.38150000  | 2.94539400  | H |
| N-N_R | 0 | 2.77519300  | 2.45190800  | 2.80336500  | L |
| F-F_  | 0 | 5.07605800  | 4.44572900  | -0.31790400 | L |
| O-O_R | 0 | 0.41956100  | -2.28762600 | 0.71798200  | H |
| C-C_R | 0 | 0.53142600  | -3.04406400 | 1.74662600  | H |
| N-N_R | 0 | 2.71108900  | -3.96926400 | 1.10731800  | L |
| F-F_  | 0 | 5.09825600  | -3.89246400 | -2.53251200 | L |
| O-O_R | 0 | 0.05580800  | -2.79831600 | 2.90391800  | H |
| C-C_3 | 0 | 1.33569900  | -4.32283700 | 1.50000700  | L |

|       |   |             |             |             |   |
|-------|---|-------------|-------------|-------------|---|
| F-F_  | 0 | 7.20337500  | -2.07585700 | -2.31298400 | L |
| O-O_R | 0 | 2.66553100  | -4.70075100 | -1.14764400 | L |
| F-F_  | 0 | 7.50719200  | -0.63893500 | 0.05077700  | L |
| C-C_R | 0 | 3.29370300  | -4.18877200 | -0.18258500 | L |
| O-O_R | 0 | 3.23894300  | -2.30879300 | 2.72018700  | L |
| C-C_R | 0 | 4.46896300  | -3.33414200 | -0.33341600 | L |
| C-C_R | 0 | 4.63384100  | -2.63265600 | 0.79069000  | L |
| C-C_R | 0 | 3.57341200  | -3.00267400 | 1.72396400  | L |
| C-C_R | 0 | 5.28686000  | -3.18469700 | -1.39094600 | L |
| C-C_R | 0 | 6.34708200  | -2.26506600 | -1.27907400 | L |
| C-C_R | 0 | 6.49867600  | -1.53635200 | -0.07748000 | L |
| C-C_R | 0 | 5.62757600  | -1.73123300 | 0.94096600  | L |
| C-C_3 | 0 | 1.32066400  | -5.41968700 | 2.62965400  | L |
| C-C_3 | 0 | 2.07769000  | -6.66846200 | 2.11767500  | L |
| C-C_3 | 0 | 2.00569200  | -4.95236800 | 3.93490100  | L |
| C-C_3 | 0 | -0.13039400 | -5.85761400 | 2.94324200  | L |
| F-F_  | 0 | 5.75590300  | -1.02902700 | 2.09493100  | L |
| O-O_R | 0 | -2.29108300 | -1.23699800 | 0.31321900  | H |
| F-F_  | 0 | -0.42942600 | -5.81639600 | -1.90259700 | L |
| C-C_R | 0 | -2.97550800 | -1.92123700 | 1.15919700  | H |
| N-N_R | 0 | -3.82269400 | -3.40578000 | -0.60404500 | L |
| O-O_R | 0 | -2.69479400 | -2.05141300 | 2.39432300  | H |
| F-F_  | 0 | -0.10609700 | -5.66238700 | -4.66838200 | L |
| C-C_3 | 0 | -4.21444500 | -2.60375300 | 0.56923900  | L |
| O-O_R | 0 | -1.91812700 | -4.53512700 | 0.25040200  | L |
| F-F_  | 0 | -1.83941700 | -4.17302100 | -6.14046000 | L |
| C-C_R | 0 | -2.70065400 | -4.29587400 | -0.70650000 | L |
| O-O_R | 0 | -4.86198200 | -2.10224600 | -2.29336600 | L |
| F-F_  | 0 | -3.87747900 | -2.85089600 | -4.92023000 | L |
| C-C_R | 0 | -3.16262800 | -3.71083600 | -2.85134800 | L |
| C-C_R | 0 | -4.13194400 | -3.07518000 | -1.96402300 | L |
| C-C_R | 0 | -1.29398700 | -5.09859600 | -2.66263400 | L |
| C-C_R | 0 | -1.13080000 | -5.01229100 | -4.06260500 | L |
| C-C_R | 0 | -1.99855800 | -4.26602600 | -4.79635700 | L |
| C-C_R | 0 | -3.01947400 | -3.60668200 | -4.18975000 | L |
| C-C_3 | 0 | -5.13060800 | -3.43025500 | 1.54825500  | L |
| C-C_3 | 0 | -5.69106200 | -2.52439800 | 2.67119100  | L |
| C-C_3 | 0 | -4.39616200 | -4.63398400 | 2.18245600  | L |
| C-C_3 | 0 | -6.34285000 | -3.97517700 | 0.75499700  | L |
| C-C_R | 0 | -2.32463700 | -4.43392000 | -2.10963500 | L |
| H-H_  | 0 | -2.17690000 | 3.62473100  | 2.16632600  | L |
| H-H_  | 0 | -4.79550900 | 2.56333700  | 5.46203800  | L |
| H-H_  | 0 | -4.09801400 | 1.21161400  | 4.52862800  | L |
| H-H_  | 0 | -5.38238600 | 2.24485400  | 3.80563900  | L |

|         |   |             |             |             |   |
|---------|---|-------------|-------------|-------------|---|
| H-H_    | 0 | -4.37985100 | 4.97163200  | 4.81977600  | L |
| H-H_    | 0 | -4.94197200 | 4.62584300  | 3.15197500  | L |
| H-H_    | 0 | -3.32515000 | 5.37243200  | 3.41817300  | L |
| H-H_    | 0 | -2.58676800 | 3.66822200  | 5.88522200  | L |
| H-H_    | 0 | -1.46397900 | 4.02617600  | 4.53233200  | L |
| H-H_    | 0 | -1.74829200 | 2.32723600  | 5.05677200  | L |
| H-H_    | 0 | 3.55529800  | 0.50824300  | 2.96414300  | L |
| H-H_    | 0 | 4.62921900  | 1.87401000  | 6.26302400  | L |
| H-H_    | 0 | 4.34830300  | 2.91670800  | 4.83330700  | L |
| H-H_    | 0 | 5.17841100  | 1.33004600  | 4.63744500  | L |
| H-H_    | 0 | 2.15541700  | 1.98947200  | 6.80004700  | L |
| H-H_    | 0 | 0.91606200  | 1.53271200  | 5.59607400  | L |
| H-H_    | 0 | 1.89318200  | 3.02452700  | 5.36350400  | L |
| H-H_    | 0 | 3.43154100  | -0.20901200 | 6.61229400  | L |
| H-H_    | 0 | 3.85523000  | -0.86051300 | 4.99264900  | L |
| H-H_    | 0 | 2.14005200  | -0.79088200 | 5.53369600  | L |
| H-H_    | 0 | 0.84286800  | -4.79720400 | 0.62164300  | L |
| H-H_    | 0 | 2.04876300  | -7.48626300 | 2.87028200  | L |
| H-H_    | 0 | 3.14504100  | -6.43500200 | 1.91592400  | L |
| H-H_    | 0 | 1.62149000  | -7.04828400 | 1.17778800  | L |
| H-H_    | 0 | 1.93150000  | -5.74285600 | 4.71283900  | L |
| H-H_    | 0 | 1.54008500  | -4.03783700 | 4.34978300  | L |
| H-H_    | 0 | 3.08547300  | -4.75740000 | 3.77140600  | L |
| H-H_    | 0 | -0.13713400 | -6.71059600 | 3.65604200  | L |
| H-H_    | 0 | -0.65015300 | -6.18437300 | 2.01747800  | L |
| H-H_    | 0 | -0.72106600 | -5.04352100 | 3.40748200  | L |
| H-H_    | 0 | -4.84529300 | -1.76246300 | 0.20729400  | L |
| H-H_    | 0 | -6.42283500 | -3.08189900 | 3.29528200  | L |
| H-H_    | 0 | -6.21548500 | -1.64519200 | 2.24012900  | L |
| H-H_    | 0 | -4.89825400 | -2.16167000 | 3.35367400  | L |
| H-H_    | 0 | -5.06104300 | -5.15401300 | 2.90563400  | L |
| H-H_    | 0 | -3.48523400 | -4.32642600 | 2.73187400  | L |
| H-H_    | 0 | -4.10978000 | -5.37794300 | 1.41111700  | L |
| H-H_    | 0 | -7.04385500 | -4.51880600 | 1.42515300  | L |
| H-H_    | 0 | -6.01949100 | -4.68457000 | -0.03657800 | L |
| H-H_    | 0 | -6.90106600 | -3.14477700 | 0.27049900  | L |
| N-N_3   | 0 | 0.08620100  | 0.13825100  | -0.90548800 | H |
| S-S_3+6 | 0 | 0.56309400  | -0.89364600 | -2.10350500 | H |
| O-O_2   | 0 | -0.01048000 | -2.24906900 | -2.12027600 | H |
| O-O_R   | 0 | 2.19072200  | -1.11522600 | -1.44678700 | H |
| O-O_2   | 0 | 0.70613000  | -0.14011700 | -3.37055600 | H |
| C-C_R   | 0 | 3.22523000  | -0.40642900 | -2.00470100 | H |
| C-C_R   | 0 | 3.65673400  | -0.64671900 | -3.32395300 | H |
| C-C_R   | 0 | 3.91814900  | 0.50806400  | -1.18701900 | H |



|       |   |             |             |             |   |
|-------|---|-------------|-------------|-------------|---|
| C-C_R | 0 | 4.79396500  | 0.01175300  | -3.80323800 | H |
| H-H_  | 0 | 3.12115000  | -1.36612400 | -3.94483600 | H |
| C-C_R | 0 | 5.03926800  | 1.16257200  | -1.69152600 | H |
| H-H_  | 0 | 3.54432800  | 0.68562300  | -0.17744700 | H |
| C-C_R | 0 | 5.51314000  | 0.92993200  | -3.00844000 | H |
| H-H_  | 0 | 5.12319300  | -0.20672300 | -4.82031600 | H |
| H-H_  | 0 | 5.56246600  | 1.87308000  | -1.04752200 | H |
| C-C_3 | 0 | 6.74774800  | 1.69011700  | -3.52635800 | H |
| C-C_3 | 0 | 6.39875500  | 3.20099000  | -3.61769200 | H |
| H-H_  | 0 | 6.11417700  | 3.61405600  | -2.63743500 | H |
| H-H_  | 0 | 7.26917600  | 3.77149200  | -3.98464800 | H |
| H-H_  | 0 | 5.55967500  | 3.37124700  | -4.31190300 | H |
| C-C_3 | 0 | 7.19207900  | 1.20716300  | -4.92426900 | H |
| H-H_  | 0 | 8.09285800  | 1.76016800  | -5.23731100 | H |
| H-H_  | 0 | 7.44349100  | 0.13332500  | -4.92559300 | H |
| H-H_  | 0 | 6.41742500  | 1.38323100  | -5.68874000 | H |
| C-C_3 | 0 | 7.93881100  | 1.49977500  | -2.55035200 | H |
| H-H_  | 0 | 8.81383700  | 2.06719000  | -2.91005100 | H |
| H-H_  | 0 | 7.70795400  | 1.85753500  | -1.53452800 | H |
| H-H_  | 0 | 8.22839200  | 0.43911500  | -2.47806300 | H |
| C-C_R | 0 | -0.87857700 | 3.71638500  | -2.91031500 | H |
| C-C_R | 0 | -1.33530900 | 5.05086400  | -2.86359100 | H |
| C-C_R | 0 | -0.49663800 | 6.11726400  | -3.21460200 | H |
| C-C_R | 0 | 0.82889800  | 5.86969900  | -3.60538000 | H |
| C-C_R | 0 | 1.30464300  | 4.54855100  | -3.63940700 | H |
| C-C_R | 0 | 0.46070600  | 3.48412800  | -3.29896600 | H |
| H-H_  | 0 | -2.36555700 | 5.25128700  | -2.55302100 | H |
| H-H_  | 0 | -0.87502700 | 7.14329900  | -3.17636600 | H |
| H-H_  | 0 | 1.48929200  | 6.70095200  | -3.86964400 | H |
| H-H_  | 0 | 2.34052600  | 4.34772100  | -3.92882000 | H |
| H-H_  | 0 | 0.83532300  | 2.45740000  | -3.32733900 | H |
| C-C_3 | 0 | -1.79129400 | 2.56156400  | -2.56637900 | H |
| H-H_  | 0 | -2.66292700 | 2.93827700  | -2.00502000 | H |
| H-H_  | 0 | -1.25271800 | 1.86561600  | -1.89084500 | H |
| C-C_3 | 0 | -2.30689500 | 1.73552400  | -3.77933400 | H |
| H-H_  | 0 | -1.42209000 | 1.33228700  | -4.30410300 | H |
| C-C_3 | 0 | -3.14990000 | 0.54721000  | -3.28642500 | H |
| H-H_  | 0 | -4.05280900 | 0.89751800  | -2.75652500 | H |
| H-H_  | 0 | -3.48062800 | -0.08187800 | -4.12995900 | H |
| H-H_  | 0 | -2.58616600 | -0.09427800 | -2.58959300 | H |
| C-C_3 | 0 | -3.10339800 | 2.60078300  | -4.77187200 | H |
| H-H_  | 0 | -4.00066700 | 3.03114100  | -4.29313300 | H |
| H-H_  | 0 | -2.49751900 | 3.43535000  | -5.15953200 | H |
| H-H_  | 0 | -3.44330400 | 1.99815600  | -5.63127700 | H |

**<sup>1</sup>TS2**

|       |   |             |             |             |   |
|-------|---|-------------|-------------|-------------|---|
| C-C_R | 0 | 2.24913500  | -5.22536200 | 1.42273500  | L |
| C-C_R | 0 | -5.02229800 | 4.10799000  | 1.15410300  | L |
| C-C_R | 0 | 5.12897700  | 3.91220300  | 2.22285200  | L |
| C-C_R | 0 | -5.50851400 | -2.06296200 | -1.01596400 | L |
| C-C_3 | 0 | 5.25995100  | -2.09833400 | -2.65791400 | L |
| C-C_3 | 0 | 2.36056600  | 4.64030500  | -3.14222600 | L |
| C-C_3 | 0 | -3.65056100 | 1.91411300  | -4.24261200 | L |
| C-C_3 | 0 | -0.92470200 | -4.72572200 | -3.65890900 | L |
| C-C_3 | 0 | 1.04582000  | 4.73808200  | -3.95164600 | L |
| C-C_3 | 0 | 6.62156300  | -2.62589200 | -2.14383400 | L |
| C-C_3 | 0 | -1.46631300 | -6.15261000 | -3.40396100 | L |
| C-C_3 | 0 | -2.75931100 | 3.05465000  | -4.78714200 | L |
| C-C_3 | 0 | 4.59696100  | -3.22213000 | -3.48783900 | L |
| C-C_3 | 0 | -1.75931200 | -4.09968800 | -4.80030400 | L |
| C-C_3 | 0 | 3.47036300  | 4.04990200  | -4.04343800 | L |
| C-C_3 | 0 | -5.11568800 | 2.41476900  | -4.24251700 | L |
| C-C_3 | 0 | 2.77756600  | 6.08116700  | -2.76224400 | L |
| C-C_3 | 0 | 0.54577300  | -4.86586400 | -4.12062500 | L |
| C-C_3 | 0 | -3.58651600 | 0.70404600  | -5.20654100 | L |
| C-C_3 | 0 | 5.55901100  | -0.88897500 | -3.57632500 | L |
| C-C_R | 0 | -1.84218200 | 0.92222200  | -2.56791400 | H |
| C-C_R | 0 | -0.38422600 | -2.50975400 | -2.30092600 | H |
| C-C_R | 0 | 3.00697500  | -1.05304700 | -1.71148500 | H |
| C-C_R | 0 | 1.55348400  | 2.40588500  | -1.95949300 | H |
| C-C_3 | 0 | -3.25365900 | 1.48872600  | -2.77758700 | L |
| C-C_3 | 0 | -1.00621600 | -3.90891800 | -2.31529800 | L |
| C-C_3 | 0 | 4.38443800  | -1.66344600 | -1.42286800 | L |
| C-C_3 | 0 | 2.13694300  | 3.81562800  | -1.81932300 | L |
| C-C_R | 0 | -2.61231800 | 3.63416400  | -1.42056000 | L |
| C-C_R | 0 | -2.84692800 | -4.38845100 | -0.56489400 | L |
| C-C_R | 0 | 4.78144400  | -2.77816400 | 0.86745600  | L |
| C-C_R | 0 | 4.43344300  | 2.81399500  | -1.09667900 | L |
| C-C_R | 0 | -3.14541500 | 4.28511100  | -0.22552700 | L |
| C-C_R | 0 | -4.09470000 | -3.73296900 | -0.17816900 | L |
| C-C_R | 0 | 4.04228600  | -3.72684900 | 1.69369000  | L |
| C-C_R | 0 | 5.18978300  | 2.81584100  | 0.15143400  | L |
| C-C_R | 0 | -4.30672200 | 3.70913100  | 0.08797600  | L |
| C-C_R | 0 | -4.41704700 | -2.84497200 | -1.11862700 | L |
| C-C_R | 0 | 3.11971400  | -4.31820000 | 0.93096400  | L |
| C-C_R | 0 | 4.65543000  | 3.71934200  | 0.97334300  | L |
| C-C_R | 0 | -4.57600300 | 2.65623200  | -0.88453700 | L |
| C-C_R | 0 | -3.39712100 | -2.88389700 | -2.16190700 | L |

|       |   |             |             |             |   |
|-------|---|-------------|-------------|-------------|---|
| C-C_R | 0 | 3.22196900  | -3.77333600 | -0.42117700 | L |
| C-C_R | 0 | 3.52985100  | 4.35223500  | 0.29063100  | L |
| C-C_R | 0 | -2.62885500 | 5.29084900  | 0.51154100  | L |
| C-C_R | 0 | -4.84269300 | -3.89853500 | 0.92953400  | L |
| C-C_R | 0 | 4.16408200  | -4.00029400 | 3.00487000  | L |
| C-C_R | 0 | 6.23313800  | 2.05497200  | 0.52866500  | L |
| C-C_R | 0 | -3.31139400 | 5.72557800  | 1.60260900  | L |
| C-C_R | 0 | -6.00199200 | -3.10688600 | 1.08044600  | L |
| C-C_R | 0 | 3.28208400  | -4.94461800 | 3.56449200  | L |
| C-C_R | 0 | 6.75102300  | 2.24683500  | 1.82831900  | L |
| C-C_R | 0 | -4.49872800 | 5.15638200  | 1.94212200  | L |
| C-C_R | 0 | -6.32939800 | -2.20449000 | 0.12330600  | L |
| C-C_R | 0 | 2.31364900  | -5.55469000 | 2.73489200  | L |
| C-C_R | 0 | 6.18485200  | 3.17137800  | 2.64878100  | L |
| F-F_  | 0 | -1.44435100 | 5.85916500  | 0.17159200  | L |
| F-F_  | 0 | -4.49065800 | -4.79626200 | 1.88347900  | L |
| F-F_  | 0 | 5.10290400  | -3.38775300 | 3.76816600  | L |
| F-F_  | 0 | 6.76848300  | 1.12869800  | -0.30512100 | L |
| F-F_  | 0 | -2.80490300 | 6.73223200  | 2.35799800  | L |
| F-F_  | 0 | -6.77878200 | -3.24483800 | 2.18359600  | L |
| F-F_  | 0 | 3.35643800  | -5.25851400 | 4.88152900  | L |
| F-F_  | 0 | 7.80015100  | 1.50243900  | 2.25806400  | L |
| F-F_  | 0 | -5.17982700 | 5.59268400  | 3.03086800  | L |
| F-F_  | 0 | -7.43768500 | -1.43510400 | 0.25949700  | L |
| F-F_  | 0 | 1.44808000  | -6.46058100 | 3.25427600  | L |
| F-F_  | 0 | 6.67228100  | 3.34967800  | 3.90217700  | L |
| F-F_  | 0 | -6.21370600 | 3.53557800  | 1.45735500  | L |
| F-F_  | 0 | -5.81880500 | -1.16338200 | -1.98235600 | L |
| F-F_  | 0 | 1.31463300  | -5.79331400 | 0.61908000  | L |
| F-F_  | 0 | 4.56055300  | 4.83011500  | 3.04420600  | L |
| H-H_  | 0 | -1.38473900 | -6.77746500 | -4.31990900 | L |
| H-H_  | 0 | -3.07349300 | 3.33123000  | -5.81682700 | L |
| H-H_  | 0 | 1.17803800  | 5.39784900  | -4.83644800 | L |
| H-H_  | 0 | 7.29217200  | -2.88676300 | -2.99133700 | L |
| H-H_  | 0 | -2.53689200 | -6.12706100 | -3.10780400 | L |
| H-H_  | 0 | 6.49223600  | -3.54144400 | -1.52796600 | L |
| H-H_  | 0 | -1.69193300 | 2.76543900  | -4.83619900 | L |
| H-H_  | 0 | 0.23292200  | 5.16621500  | -3.32773700 | L |
| H-H_  | 0 | -0.89362100 | -6.65307300 | -2.59321400 | L |
| H-H_  | 0 | 7.13168500  | -1.85761200 | -1.52302400 | L |
| H-H_  | 0 | -2.84724800 | 3.96418300  | -4.15790100 | L |
| H-H_  | 0 | 0.71621600  | 3.74957200  | -4.32827200 | L |
| H-H_  | 0 | -1.63599500 | -4.68868700 | -5.73489300 | L |
| H-H_  | 0 | 5.23463300  | -3.48531200 | -4.35937300 | L |

|       |   |             |             |             |   |
|-------|---|-------------|-------------|-------------|---|
| H-H_  | 0 | 3.57447700  | 4.65356100  | -4.97100000 | L |
| H-H_  | 0 | -5.45394600 | 2.65536300  | -5.27388000 | L |
| H-H_  | 0 | -1.45208800 | -3.06021100 | -5.02443400 | L |
| H-H_  | 0 | 3.60627200  | -2.92333400 | -3.88189200 | L |
| H-H_  | 0 | 3.25250600  | 3.01006400  | -4.35334100 | L |
| H-H_  | 0 | -5.22619000 | 3.33842300  | -3.63540700 | L |
| H-H_  | 0 | -2.84084500 | -4.10508700 | -4.55332500 | L |
| H-H_  | 0 | 4.47117300  | -4.14309500 | -2.88207300 | L |
| H-H_  | 0 | 4.45390000  | 4.06896600  | -3.53048400 | L |
| H-H_  | 0 | -5.79582700 | 1.63929100  | -3.82802300 | L |
| H-H_  | 0 | 6.26948700  | -1.17574700 | -4.38177300 | L |
| H-H_  | 0 | 0.61677100  | -5.53344600 | -5.00661800 | L |
| H-H_  | 0 | 2.90170100  | 6.71077600  | -3.67012400 | L |
| H-H_  | 0 | -3.98789800 | 0.97841300  | -6.20622800 | L |
| H-H_  | 0 | 6.02092400  | -0.06222600 | -2.99588800 | L |
| H-H_  | 0 | 1.17011600  | -5.30480700 | -3.31350000 | L |
| H-H_  | 0 | -4.19466900 | -0.13967200 | -4.81609500 | L |
| H-H_  | 0 | 3.74384900  | 6.08610400  | -2.21385600 | L |
| H-H_  | 0 | 4.64952700  | -0.50313600 | -4.07580100 | L |
| H-H_  | 0 | 2.00881100  | 6.55730400  | -2.11569400 | L |
| H-H_  | 0 | -2.55213100 | 0.34534900  | -5.36903600 | L |
| H-H_  | 0 | 0.98505100  | -3.89140700 | -4.41224300 | L |
| H-H_  | 0 | -3.93326700 | 0.65230900  | -2.50478400 | L |
| H-H_  | 0 | -0.40203900 | -4.48990900 | -1.58229800 | L |
| H-H_  | 0 | 4.94852700  | -0.84566300 | -0.92162000 | L |
| H-H_  | 0 | 1.36716700  | 4.38052000  | -1.24573400 | L |
| N-N_R | 0 | -3.50254200 | 2.58609100  | -1.82736500 | L |
| N-N_R | 0 | -2.38708700 | -3.83848900 | -1.80561800 | L |
| N-N_R | 0 | 4.24743000  | -2.77048700 | -0.45970700 | L |
| N-N_R | 0 | 3.36237300  | 3.76437000  | -1.00408000 | L |
| O-O_R | 0 | -1.55936600 | 0.59179600  | -1.36021100 | H |
| O-O_R | 0 | -0.25231100 | -2.00615200 | -1.13048800 | H |
| O-O_R | 0 | 2.34969100  | -0.68481300 | -0.66750100 | H |
| O-O_R | 0 | 1.09057800  | 1.90292200  | -0.87093700 | H |
| O-O_R | 0 | -1.06009800 | 0.80711300  | -3.56688600 | H |
| O-O_R | 0 | -0.06833100 | -1.93907500 | -3.39739300 | H |
| O-O_R | 0 | 2.60073700  | -0.94234800 | -2.91128500 | H |
| O-O_R | 0 | 1.58811000  | 1.82155300  | -3.08965600 | H |
| O-O_R | 0 | -1.41654400 | 3.72311900  | -1.80369400 | L |
| O-O_R | 0 | -2.09705700 | -5.00544300 | 0.23829500  | L |
| O-O_R | 0 | 5.58046500  | -1.90875100 | 1.30527700  | L |
| O-O_R | 0 | 4.46163500  | 1.87663200  | -1.93693600 | L |
| O-O_R | 0 | -5.48603800 | 1.79047900  | -0.78697500 | L |
| O-O_R | 0 | -3.22049200 | -1.96857500 | -3.00827600 | L |

|         |   |             |             |             |   |
|---------|---|-------------|-------------|-------------|---|
| O-O_R   | 0 | 2.32592200  | -3.88694100 | -1.29810600 | L |
| O-O_R   | 0 | 2.65021100  | 5.05335800  | 0.85757300  | L |
| Rh-     | 0 | 0.39439300  | -0.06156300 | -0.88268400 | H |
| Rh-     | 0 | 0.77306500  | -0.06279700 | -3.28287000 | H |
| N-N_3   | 0 | -0.15279100 | 0.01082200  | 1.02143300  | H |
| S-S_3+6 | 0 | -0.25781100 | -1.38518900 | 1.95655900  | H |
| O-O_2   | 0 | 0.55950100  | -2.54622600 | 1.57329000  | H |
| O-O_R   | 0 | -1.85136300 | -1.78765500 | 1.39057400  | H |
| O-O_2   | 0 | -0.36587300 | -0.99311700 | 3.38019200  | H |
| C-C_R   | 0 | -2.92680700 | -1.28287500 | 2.10666500  | H |
| C-C_R   | 0 | -3.29780400 | -1.85990000 | 3.33107000  | H |
| C-C_R   | 0 | -3.69032500 | -0.24568500 | 1.54652500  | H |
| C-C_R   | 0 | -4.44678200 | -1.40083500 | 3.98788600  | H |
| H-H_    | 0 | -2.69949500 | -2.67275900 | 3.74589400  | H |
| C-C_R   | 0 | -4.82167700 | 0.20572100  | 2.22768000  | H |
| H-H_    | 0 | -3.36917500 | 0.19354200  | 0.60007700  | H |
| C-C_R   | 0 | -5.23234900 | -0.35639700 | 3.46035900  | H |
| H-H_    | 0 | -4.72400000 | -1.87441900 | 4.93132300  | H |
| H-H_    | 0 | -5.40022400 | 1.02241000  | 1.79187000  | H |
| C-C_3   | 0 | -6.46891300 | 0.20777700  | 4.18662800  | H |
| C-C_3   | 0 | -6.15189100 | 1.65573000  | 4.64979700  | H |
| H-H_    | 0 | -5.88951900 | 2.30673500  | 3.80113400  | H |
| H-H_    | 0 | -7.02604300 | 2.09738900  | 5.15882400  | H |
| H-H_    | 0 | -5.30299000 | 1.66653300  | 5.35310400  | H |
| C-C_3   | 0 | -6.85275100 | -0.62751900 | 5.42764400  | H |
| H-H_    | 0 | -7.75761600 | -0.20432900 | 5.89437800  | H |
| H-H_    | 0 | -7.07267600 | -1.67527700 | 5.16246100  | H |
| H-H_    | 0 | -6.05757900 | -0.62339600 | 6.19140100  | H |
| C-C_3   | 0 | -7.68879500 | 0.22919700  | 3.22916400  | H |
| H-H_    | 0 | -8.56571900 | 0.65873000  | 3.74296800  | H |
| H-H_    | 0 | -7.50361100 | 0.83588700  | 2.32865300  | H |
| H-H_    | 0 | -7.95219700 | -0.78964200 | 2.90174000  | H |
| C-C_R   | 0 | 2.45493400  | 0.87309500  | 3.42707200  | H |
| C-C_R   | 0 | 3.75844500  | 0.56547700  | 2.96635500  | H |
| C-C_R   | 0 | 4.68126900  | -0.08742700 | 3.78713900  | H |
| C-C_R   | 0 | 4.30995700  | -0.48656100 | 5.08203900  | H |
| C-C_R   | 0 | 3.00793300  | -0.22999200 | 5.54252900  | H |
| C-C_R   | 0 | 2.09084800  | 0.43920700  | 4.72706200  | H |
| H-H_    | 0 | 4.03480600  | 0.85011300  | 1.94851800  | H |
| H-H_    | 0 | 5.69335700  | -0.28520400 | 3.42461300  | H |
| H-H_    | 0 | 5.02829500  | -1.00453800 | 5.72367200  | H |
| H-H_    | 0 | 2.70708600  | -0.55514600 | 6.54226000  | H |
| H-H_    | 0 | 1.07973900  | 0.62261600  | 5.09308200  | H |
| C-C_3   | 0 | 1.52613200  | 1.63980800  | 2.54913200  | H |

|       |   |             |            |            |   |
|-------|---|-------------|------------|------------|---|
| H-H_  | 0 | 0.85373500  | 0.87923500 | 1.93349100 | H |
| C-C_3 | 0 | 0.51936200  | 2.60403900 | 3.20598900 | H |
| C-C_3 | 0 | 1.25440600  | 3.70314800 | 4.00647900 | H |
| H-H_  | 0 | 1.87830000  | 4.32354200 | 3.34175500 | H |
| H-H_  | 0 | 0.52363100  | 4.36942800 | 4.49528800 | H |
| H-H_  | 0 | 1.90840900  | 3.27799500 | 4.78376900 | H |
| C-C_3 | 0 | -0.42112800 | 3.22839700 | 2.16187800 | H |
| H-H_  | 0 | 0.14381400  | 3.81787200 | 1.41989200 | H |
| H-H_  | 0 | -0.98568000 | 2.45600100 | 1.61944900 | H |
| H-H_  | 0 | -1.13912700 | 3.90371300 | 2.65611000 | H |
| H-H_  | 0 | -0.10271900 | 2.02153500 | 3.90894200 | H |
| H-H_  | 0 | 2.07808000  | 2.13564600 | 1.73222200 | H |

### **<sup>3</sup>INT3**

|       |   |             |             |             |   |
|-------|---|-------------|-------------|-------------|---|
| C-C_R | 0 | 5.82210200  | -1.39413200 | 0.49133300  | L |
| C-C_R | 0 | -5.64370700 | 3.60547100  | -1.83309000 | L |
| C-C_R | 0 | -3.01043600 | -4.50021900 | -3.34537700 | L |
| C-C_R | 0 | 1.10262800  | 5.81537100  | 0.69414800  | L |
| C-C_3 | 0 | 1.90786200  | -4.93561700 | 3.12815700  | L |
| C-C_3 | 0 | -4.81009000 | -3.36666500 | 2.39170800  | L |
| C-C_3 | 0 | -3.32067000 | 3.46962000  | 3.69922100  | L |
| C-C_3 | 0 | 3.39673100  | 1.85865400  | 4.40839500  | L |
| C-C_3 | 0 | -5.31254600 | -2.29016800 | 3.38402700  | L |
| C-C_3 | 0 | 2.70404700  | -6.19841300 | 2.71998000  | L |
| C-C_3 | 0 | 4.73377500  | 2.63804500  | 4.42949500  | L |
| C-C_3 | 0 | -4.32203100 | 2.47371100  | 4.33042500  | L |
| C-C_3 | 0 | 2.67985000  | -4.23844300 | 4.27277900  | L |
| C-C_3 | 0 | 2.36933100  | 2.65894000  | 5.24313100  | L |
| C-C_3 | 0 | -4.00526600 | -4.43784900 | 3.16334100  | L |
| C-C_3 | 0 | -4.04547400 | 4.82746400  | 3.53471300  | L |
| C-C_3 | 0 | -6.05968400 | -4.05269500 | 1.78901000  | L |
| C-C_3 | 0 | 3.65552800  | 0.49213700  | 5.08716900  | L |
| C-C_3 | 0 | -2.13991900 | 3.69847600  | 4.67297700  | L |
| C-C_3 | 0 | 0.53270500  | -5.41147700 | 3.65537300  | L |
| C-C_R | 0 | -1.94919900 | 1.72052700  | 2.24921700  | H |
| C-C_R | 0 | 1.67974100  | 0.83653800  | 2.65693800  | H |
| C-C_R | 0 | 0.87105500  | -2.75983400 | 2.01429400  | H |
| C-C_R | 0 | -2.74586600 | -1.88769500 | 1.60556400  | H |
| C-C_3 | 0 | -2.80124600 | 2.99581100  | 2.28898700  | L |
| C-C_3 | 0 | 2.94656800  | 1.66194900  | 2.91110000  | L |
| C-C_3 | 0 | 1.72904300  | -4.01899800 | 1.85960600  | L |
| C-C_3 | 0 | -3.98452600 | -2.70636000 | 1.22496800  | L |
| C-C_R | 0 | -4.69678900 | 1.72229200  | 1.02428500  | L |
| C-C_R | 0 | 3.67745100  | 3.39707100  | 1.14545100  | L |

|       |   |             |             |             |   |
|-------|---|-------------|-------------|-------------|---|
| C-C_R | 0 | 3.51536400  | -4.07310500 | -0.01281000 | L |
| C-C_R | 0 | -2.44995800 | -4.52647900 | 0.17422600  | L |
| C-C_R | 0 | -5.41034700 | 1.92286300  | -0.23161100 | L |
| C-C_R | 0 | 3.07210000  | 4.55972200  | 0.50072800  | L |
| C-C_R | 0 | 4.63780000  | -3.22167100 | -0.40031500 | L |
| C-C_R | 0 | -2.14050900 | -4.89027100 | -1.20424700 | L |
| C-C_R | 0 | -5.12463100 | 3.14519700  | -0.68096800 | L |
| C-C_R | 0 | 1.90216800  | 4.80778600  | 1.09131600  | L |
| C-C_R | 0 | 4.86125300  | -2.33877200 | 0.57660300  | L |
| C-C_R | 0 | -3.06787100 | -4.36455700 | -2.00325700 | L |
| C-C_R | 0 | -4.20261700 | 3.78465600  | 0.25647600  | L |
| C-C_R | 0 | 1.71209900  | 3.83922200  | 2.16640100  | L |
| C-C_R | 0 | 3.89527400  | -2.57986600 | 1.64497400  | L |
| C-C_R | 0 | -4.02805600 | -3.63766200 | -1.17741800 | L |
| C-C_R | 0 | -6.21816000 | 1.08308800  | -0.91266100 | L |
| C-C_R | 0 | 3.52352500  | 5.30608400  | -0.52449000 | L |
| C-C_R | 0 | 5.36108100  | -3.22471900 | -1.53445600 | L |
| C-C_R | 0 | -1.10000200 | -5.58452400 | -1.69916900 | L |
| C-C_R | 0 | -6.76671400 | 1.50238700  | -2.08210800 | L |
| C-C_R | 0 | 2.72295200  | 6.37778800  | -0.97633000 | L |
| C-C_R | 0 | 6.38452500  | -2.26667400 | -1.66581900 | L |
| C-C_R | 0 | -1.02366300 | -5.74594400 | -3.09989900 | L |
| C-C_R | 0 | -6.50301100 | 2.74889500  | -2.55638100 | L |
| C-C_R | 0 | 1.53300600  | 6.62864600  | -0.37669600 | L |
| C-C_R | 0 | 6.59815300  | -1.34316200 | -0.61749500 | L |
| C-C_R | 0 | -1.98236900 | -5.19867000 | -3.89344800 | L |
| F-F_  | 0 | -6.47997900 | -0.16117700 | -0.43915900 | L |
| F-F_  | 0 | 4.71307700  | 5.03498300  | -1.11606700 | L |
| F-F_  | 0 | 5.11319500  | -4.11732700 | -2.52513200 | L |
| F-F_  | 0 | -0.14877500 | -6.10545900 | -0.88446300 | L |
| F-F_  | 0 | -7.58002700 | 0.67217800  | -2.78186800 | L |
| F-F_  | 0 | 3.14228200  | 7.14922900  | -2.01002600 | L |
| F-F_  | 0 | 7.14595800  | -2.22523600 | -2.78668500 | L |
| F-F_  | 0 | 0.00670700  | -6.43625300 | -3.64892500 | L |
| F-F_  | 0 | -7.05254800 | 3.16626400  | -3.72400200 | L |
| F-F_  | 0 | 0.75430100  | 7.65244700  | -0.80674500 | L |
| F-F_  | 0 | 7.56884500  | -0.40244200 | -0.72779700 | L |
| F-F_  | 0 | -1.90847900 | -5.34540500 | -5.24015000 | L |
| F-F_  | 0 | -5.35010100 | 4.84773100  | -2.29152600 | L |
| F-F_  | 0 | -0.08588700 | 6.04801600  | 1.30562400  | L |
| F-F_  | 0 | 6.00809600  | -0.50387100 | 1.49842800  | L |
| F-F_  | 0 | -3.96170500 | -3.94566600 | -4.13813800 | L |
| H-H_  | 0 | 5.11381100  | 2.74641800  | 5.46867000  | L |
| H-H_  | 0 | -4.66738000 | 2.84868800  | 5.31819100  | L |

|       |   |             |             |            |   |
|-------|---|-------------|-------------|------------|---|
| H-H_  | 0 | -5.99503800 | -2.74002300 | 4.13741200 | L |
| H-H_  | 0 | 2.80541500  | -6.89819800 | 3.57793500 | L |
| H-H_  | 0 | 4.60984100  | 3.65980300  | 4.01125200 | L |
| H-H_  | 0 | 3.72828800  | -5.93428600 | 2.38008300 | L |
| H-H_  | 0 | -3.87478600 | 1.47531100  | 4.49825200 | L |
| H-H_  | 0 | -5.87438200 | -1.49519200 | 2.84872600 | L |
| H-H_  | 0 | 5.50774200  | 2.10839000  | 3.83266100 | L |
| H-H_  | 0 | 2.19174500  | -6.73733200 | 1.89359600 | L |
| H-H_  | 0 | -5.22081300 | 2.35371900  | 3.69079800 | L |
| H-H_  | 0 | -4.48309600 | -1.81666100 | 3.94456000 | L |
| H-H_  | 0 | 2.71455200  | 2.74824400  | 6.29592000 | L |
| H-H_  | 0 | 2.74350000  | -4.90802500 | 5.15773800 | L |
| H-H_  | 0 | -4.61095300 | -4.84529500 | 4.00157700 | L |
| H-H_  | 0 | -4.36905700 | 5.22688200  | 4.52053000 | L |
| H-H_  | 0 | 1.37424200  | 2.17459200  | 5.26379900 | L |
| H-H_  | 0 | 2.18892000  | -3.30295100 | 4.60294700 | L |
| H-H_  | 0 | -3.07249700 | -4.02905700 | 3.59786800 | L |
| H-H_  | 0 | -4.95354900 | 4.72440000  | 2.90327800 | L |
| H-H_  | 0 | 2.25141600  | 3.68941200  | 4.84970700 | L |
| H-H_  | 0 | 3.72013300  | -4.00325700 | 3.96787900 | L |
| H-H_  | 0 | -3.74386800 | -5.29121300 | 2.50430000 | L |
| H-H_  | 0 | -3.37485400 | 5.57766400  | 3.06228600 | L |
| H-H_  | 0 | 0.66186900  | -6.14143100 | 4.48375600 | L |
| H-H_  | 0 | 4.06885900  | 0.63477800  | 6.10920900 | L |
| H-H_  | 0 | -6.69706000 | -4.48951700 | 2.58837300 | L |
| H-H_  | 0 | -2.50294800 | 4.11801800  | 5.63625500 | L |
| H-H_  | 0 | -0.04374900 | -5.91272700 | 2.84901800 | L |
| H-H_  | 0 | 4.39214000  | -0.10048300 | 4.50418800 | L |
| H-H_  | 0 | -1.41313700 | 4.41941500  | 4.24227600 | L |
| H-H_  | 0 | -5.77283300 | -4.87695100 | 1.10144900 | L |
| H-H_  | 0 | -0.07526600 | -4.57549800 | 4.05325800 | L |
| H-H_  | 0 | -6.67320600 | -3.32193800 | 1.21852400 | L |
| H-H_  | 0 | -1.60338600 | 2.75971700  | 4.91220700 | L |
| H-H_  | 0 | 2.72998900  | -0.10610200 | 5.19510200 | L |
| H-H_  | 0 | -2.12167900 | 3.80049900  | 1.92808400 | L |
| H-H_  | 0 | 3.76253600  | 1.08421300  | 2.42062800 | L |
| H-H_  | 0 | 1.18107600  | -4.64178000 | 1.11777700 | L |
| H-H_  | 0 | -4.67106800 | -1.96658200 | 0.75673300 | L |
| N-N_R | 0 | -3.91446700 | 2.88293200  | 1.33111700 | L |
| N-N_R | 0 | 2.83790800  | 2.95389000  | 2.21459900 | L |
| N-N_R | 0 | 3.02974100  | -3.65916400 | 1.26888500 | L |
| N-N_R | 0 | -3.62245600 | -3.69797700 | 0.19594900 | L |
| O-O_R | 0 | -1.38745900 | 1.46895200  | 1.12086600 | H |
| O-O_R | 0 | 1.42016800  | 0.61638300  | 1.41728500 | H |



|         |   |             |             |             |   |
|---------|---|-------------|-------------|-------------|---|
| O-O_R   | 0 | 0.62079500  | -2.15040700 | 0.91503400  | H |
| O-O_R   | 0 | -2.18060800 | -1.28994400 | 0.61909300  | H |
| O-O_R   | 0 | -1.85628300 | 0.98979600  | 3.28916900  | H |
| O-O_R   | 0 | 0.97287500  | 0.44100500  | 3.63929500  | H |
| O-O_R   | 0 | 0.47812500  | -2.38885800 | 3.17001600  | H |
| O-O_R   | 0 | -2.35138500 | -1.84979400 | 2.81693400  | H |
| O-O_R   | 0 | -4.62382600 | 0.63367800  | 1.65165800  | L |
| O-O_R   | 0 | 4.88466800  | 3.05763000  | 1.02628100  | L |
| O-O_R   | 0 | 2.83527800  | -4.75820900 | -0.82274100 | L |
| O-O_R   | 0 | -1.61275200 | -4.56789700 | 1.11342900  | L |
| O-O_R   | 0 | -3.50407100 | 4.79949100  | -0.00788200 | L |
| O-O_R   | 0 | 0.60636500  | 3.59379500  | 2.71521600  | L |
| O-O_R   | 0 | 3.60872900  | -1.74013600 | 2.53789600  | L |
| O-O_R   | 0 | -4.85042200 | -2.79301900 | -1.62215800 | L |
| Rh-     | 0 | -0.36449900 | -0.33045200 | 0.90187600  | H |
| Rh-     | 0 | -0.69675800 | -0.70532100 | 3.26473700  | H |
| N-N_3   | 0 | -0.08050900 | -0.20452200 | -1.03266600 | H |
| S-S_3+6 | 0 | 0.60796400  | -1.21933000 | -2.12255000 | H |
| O-O_2   | 0 | 0.61964900  | -0.55884400 | -3.44209000 | H |
| O-O_R   | 0 | 2.23846000  | -1.26387400 | -1.53612900 | H |
| O-O_2   | 0 | 0.13876700  | -2.60836400 | -1.97810700 | H |
| C-C_R   | 0 | 3.19054200  | -0.48004100 | -2.16973300 | H |
| C-C_R   | 0 | 3.77589600  | 0.57211500  | -1.44896100 | H |
| C-C_R   | 0 | 3.64163400  | -0.79464500 | -3.46534500 | H |
| C-C_R   | 0 | 4.82656400  | 1.29605000  | -2.02358700 | H |
| H-H_    | 0 | 3.39862300  | 0.80114600  | -0.45067400 | H |
| C-C_R   | 0 | 4.69320000  | -0.06090000 | -4.01596400 | H |
| H-H_    | 0 | 3.18240600  | -1.61884800 | -4.01320400 | H |
| C-C_R   | 0 | 5.31662300  | 0.99737900  | -3.31347800 | H |
| H-H_    | 0 | 5.27306100  | 2.10854300  | -1.44953500 | H |
| H-H_    | 0 | 5.04045400  | -0.32733300 | -5.01770700 | H |
| C-C_3   | 0 | 6.47677700  | 1.77415100  | -3.96432000 | H |
| C-C_3   | 0 | 5.96657800  | 2.45411700  | -5.26321100 | H |
| H-H_    | 0 | 5.58821400  | 1.71837900  | -5.99074700 | H |
| H-H_    | 0 | 6.78491500  | 3.01464900  | -5.74682300 | H |
| H-H_    | 0 | 5.14927600  | 3.16068400  | -5.04415300 | H |
| C-C_3   | 0 | 7.04746000  | 2.86800800  | -3.03607800 | H |
| H-H_    | 0 | 7.88438000  | 3.38002200  | -3.53877600 | H |
| H-H_    | 0 | 7.43525900  | 2.44697300  | -2.09332800 | H |
| H-H_    | 0 | 6.29350700  | 3.63363200  | -2.79096300 | H |
| C-C_3   | 0 | 7.62682200  | 0.79266400  | -4.31450100 | H |
| H-H_    | 0 | 8.44794900  | 1.33403500  | -4.81467000 | H |
| H-H_    | 0 | 7.29482400  | -0.01020400 | -4.99165700 | H |
| H-H_    | 0 | 8.03458200  | 0.32064700  | -3.40588400 | H |

|       |   |             |             |             |   |
|-------|---|-------------|-------------|-------------|---|
| C-C_R | 0 | -3.04350600 | 2.09568400  | -3.49654300 | H |
| C-C_R | 0 | -3.76470000 | 2.56637000  | -4.61272000 | H |
| C-C_R | 0 | -4.56976600 | 1.70427300  | -5.37147800 | H |
| C-C_R | 0 | -4.67042200 | 0.34837500  | -5.02497500 | H |
| C-C_R | 0 | -3.96067000 | -0.13456200 | -3.91515100 | H |
| C-C_R | 0 | -3.16117700 | 0.73145600  | -3.15732600 | H |
| H-H_  | 0 | -3.70467500 | 3.62655800  | -4.87965500 | H |
| H-H_  | 0 | -5.12554400 | 2.09453500  | -6.22956200 | H |
| H-H_  | 0 | -5.30155200 | -0.32556000 | -5.61164000 | H |
| H-H_  | 0 | -4.03071700 | -1.18932700 | -3.63721400 | H |
| H-H_  | 0 | -2.62177200 | 0.34933300  | -2.28535800 | H |
| C-C_3 | 0 | -2.16665400 | 3.01771000  | -2.67321000 | H |
| H-H_  | 0 | -2.57306900 | 4.04660600  | -2.70604900 | H |
| H-H_  | 0 | -2.20164600 | 2.69228300  | -1.61859100 | H |
| C-C_3 | 0 | -0.67109600 | 3.06648000  | -3.09578700 | H |
| H-H_  | 0 | -0.29680100 | 2.02766200  | -3.09715800 | H |
| C-C_3 | 0 | 0.13177100  | 3.86464500  | -2.05450200 | H |
| H-H_  | 0 | -0.22470500 | 4.90940000  | -2.00148000 | H |
| H-H_  | 0 | 1.20450600  | 3.89002200  | -2.31084800 | H |
| H-H_  | 0 | 0.03472000  | 3.42205400  | -1.04906300 | H |
| C-C_3 | 0 | -0.47703900 | 3.64764100  | -4.50544300 | H |
| H-H_  | 0 | -0.82978100 | 4.69439200  | -4.55541900 | H |
| H-H_  | 0 | -1.02812500 | 3.06757600  | -5.26269100 | H |
| H-H_  | 0 | 0.58946400  | 3.64177800  | -4.78771300 | H |

### **<sup>3</sup>TS3**

|       |   |             |             |             |   |
|-------|---|-------------|-------------|-------------|---|
| C-C_R | 0 | -5.74095900 | -1.48056500 | -0.57352300 | L |
| C-C_R | 0 | 5.26573400  | 3.67276000  | 2.41886600  | L |
| C-C_R | 0 | 3.25684300  | -4.86715100 | 2.84633300  | L |
| C-C_R | 0 | -1.33110600 | 5.87653600  | -0.16677300 | L |
| C-C_3 | 0 | -1.70707100 | -4.52350400 | -3.63944000 | L |
| C-C_3 | 0 | 4.96946800  | -2.75561400 | -2.60083700 | L |
| C-C_3 | 0 | 3.21599800  | 4.08102300  | -3.23613300 | L |
| C-C_3 | 0 | -3.44924400 | 2.19559900  | -4.29306400 | L |
| C-C_3 | 0 | 5.44088700  | -1.53849700 | -3.43253900 | L |
| C-C_3 | 0 | -2.46056200 | -5.85257300 | -3.39153300 | L |
| C-C_3 | 0 | -4.82962700 | 2.89593900  | -4.28069800 | L |
| C-C_3 | 0 | 4.27093400  | 3.19465700  | -3.93934300 | L |
| C-C_3 | 0 | -2.49809400 | -3.72029600 | -4.69827200 | L |
| C-C_3 | 0 | -2.46037800 | 3.11217200  | -5.05127900 | L |
| C-C_3 | 0 | 4.24043400  | -3.75746300 | -3.52606600 | L |
| C-C_3 | 0 | 3.88054900  | 5.44170200  | -2.91481000 | L |
| C-C_3 | 0 | 6.23750300  | -3.45249100 | -2.05134400 | L |
| C-C_3 | 0 | -3.61835500 | 0.86894500  | -5.07183900 | L |

|       |   |             |             |             |   |
|-------|---|-------------|-------------|-------------|---|
| C-C_3 | 0 | 2.04880500  | 4.36350400  | -4.21206800 | L |
| C-C_3 | 0 | -0.31415800 | -4.88731900 | -4.20819600 | L |
| C-C_R | 0 | 1.89288300  | 2.13489300  | -2.00327100 | H |
| C-C_R | 0 | -1.70226700 | 1.14544200  | -2.58764300 | H |
| C-C_R | 0 | -0.76942700 | -2.44907000 | -2.27052000 | H |
| C-C_R | 0 | 2.81080400  | -1.49241200 | -1.70286700 | H |
| C-C_3 | 0 | 2.68534900  | 3.44574800  | -1.89533300 | L |
| C-C_3 | 0 | -3.00794600 | 1.91959000  | -2.80574500 | L |
| C-C_3 | 0 | -1.56711800 | -3.75782000 | -2.26985000 | L |
| C-C_3 | 0 | 4.08046500  | -2.29152600 | -1.38689300 | L |
| C-C_R | 0 | 4.62547500  | 2.14997900  | -0.72643200 | L |
| C-C_R | 0 | -3.85895500 | 3.49514100  | -0.94299500 | L |
| C-C_R | 0 | -3.34701200 | -4.12595400 | -0.42770000 | L |
| C-C_R | 0 | 2.61100000  | -4.29992600 | -0.61324000 | L |
| C-C_R | 0 | 5.25233000  | 2.22315600  | 0.58873600  | L |
| C-C_R | 0 | -3.27613500 | 4.56985400  | -0.14600700 | L |
| C-C_R | 0 | -4.49422900 | -3.36985400 | 0.06937400  | L |
| C-C_R | 0 | 2.34806200  | -4.91198800 | 0.68565200  | L |
| C-C_R | 0 | 4.86474900  | 3.35621800  | 1.17465400  | L |
| C-C_R | 0 | -2.11752500 | 4.92437500  | -0.70345000 | L |
| C-C_R | 0 | -4.75271800 | -2.37591200 | -0.78424000 | L |
| C-C_R | 0 | 3.26002400  | -4.47629400 | 1.55444800  | L |
| C-C_R | 0 | 3.96048800  | 4.06536600  | 0.27129200  | L |
| C-C_R | 0 | -1.89418600 | 4.09218200  | -1.88286800 | L |
| C-C_R | 0 | -3.78796200 | -2.44615400 | -1.87794300 | L |
| C-C_R | 0 | 4.13690000  | -3.53821500 | 0.86089800  | L |
| C-C_R | 0 | 6.05858100  | 1.33780600  | 1.21187600  | L |
| C-C_R | 0 | -3.72576100 | 5.14161300  | 0.98660600  | L |
| C-C_R | 0 | -5.20891100 | -3.54311400 | 1.19567100  | L |
| C-C_R | 0 | 1.37239800  | -5.75904400 | 1.05904400  | L |
| C-C_R | 0 | 6.49637600  | 1.61655400  | 2.46681300  | L |
| C-C_R | 0 | -2.94040900 | 6.15115800  | 1.58442700  | L |
| C-C_R | 0 | -6.26038800 | -2.64299000 | 1.45375100  | L |
| C-C_R | 0 | 1.34943600  | -6.18232600 | 2.40618000  | L |
| C-C_R | 0 | 6.12058700  | 2.76727400  | 3.08541000  | L |
| C-C_R | 0 | -1.76365800 | 6.51352100  | 1.01658400  | L |
| C-C_R | 0 | -6.50957700 | -1.59791500 | 0.53533900  | L |
| C-C_R | 0 | 2.29494800  | -5.72723700 | 3.27109600  | L |
| F-F_  | 0 | 6.42206600  | 0.18281900  | 0.59948900  | L |
| F-F_  | 0 | -4.90050800 | 4.75793000  | 1.54507400  | L |
| F-F_  | 0 | -4.92593800 | -4.54811700 | 2.06144400  | L |
| F-F_  | 0 | 0.43861600  | -6.19198500 | 0.17543400  | L |
| F-F_  | 0 | 7.30436300  | 0.73712600  | 3.11038200  | L |
| F-F_  | 0 | -3.36014800 | 6.75027200  | 2.72653500  | L |

|      |   |             |             |             |   |
|------|---|-------------|-------------|-------------|---|
| F-F_ | 0 | -7.01525300 | -2.77251100 | 2.57230500  | L |
| F-F_ | 0 | 0.38573100  | -7.03570800 | 2.83354800  | L |
| F-F_ | 0 | 6.55027700  | 3.03903900  | 4.34277600  | L |
| F-F_ | 0 | -0.99756900 | 7.47576200  | 1.58814600  | L |
| F-F_ | 0 | -7.50794800 | -0.71047800 | 0.76965200  | L |
| F-F_ | 0 | 2.27320900  | -6.12846700 | 4.56691600  | L |
| F-F_ | 0 | 4.85494400  | 4.81608900  | 3.02181800  | L |
| F-F_ | 0 | -0.14672900 | 6.20983400  | -0.73841900 | L |
| F-F_ | 0 | -5.96166600 | -0.47358500 | -1.45595700 | L |
| F-F_ | 0 | 4.19109300  | -4.40082000 | 3.71268500  | L |
| H-H_ | 0 | -5.20375300 | 3.05444100  | -5.31559100 | L |
| H-H_ | 0 | 4.61924400  | 3.68057000  | -4.87642500 | L |
| H-H_ | 0 | 6.15767600  | -1.85675600 | -4.22036300 | L |
| H-H_ | 0 | -2.53033400 | -6.44978200 | -4.32669600 | L |
| H-H_ | 0 | -4.77083900 | 3.89128100  | -3.79066200 | L |
| H-H_ | 0 | -3.49646300 | -5.66666800 | -3.03562900 | L |
| H-H_ | 0 | 3.86997900  | 2.20084800  | -4.21611100 | L |
| H-H_ | 0 | 5.95595500  | -0.79760500 | -2.78465800 | L |
| H-H_ | 0 | -5.57773500 | 2.28226700  | -3.73333600 | L |
| H-H_ | 0 | -1.93530900 | -6.46646800 | -2.62795100 | L |
| H-H_ | 0 | 5.16159800  | 3.04753400  | -3.29421400 | L |
| H-H_ | 0 | 4.60197300  | -1.03117900 | -3.94745300 | L |
| H-H_ | 0 | -2.80018200 | 3.26194200  | -6.09896600 | L |
| H-H_ | 0 | -2.53829400 | -4.28189200 | -5.65666400 | L |
| H-H_ | 0 | 4.89205500  | -4.03535100 | -4.38261900 | L |
| H-H_ | 0 | 4.21103200  | 5.95195700  | -3.84567500 | L |
| H-H_ | 0 | -1.43977200 | 2.68598700  | -5.09517900 | L |
| H-H_ | 0 | -2.03633900 | -2.73711100 | -4.91176600 | L |
| H-H_ | 0 | 3.30569600  | -3.33792000 | -3.94555700 | L |
| H-H_ | 0 | 4.77645100  | 5.30950200  | -2.27140100 | L |
| H-H_ | 0 | -2.40363800 | 4.11468800  | -4.57970600 | L |
| H-H_ | 0 | -3.54571100 | -3.55478100 | -4.37319300 | L |
| H-H_ | 0 | 3.99460100  | -4.69382500 | -2.98406400 | L |
| H-H_ | 0 | 3.16860000  | 6.11326300  | -2.38763900 | L |
| H-H_ | 0 | -0.41510600 | -5.52274200 | -5.11472400 | L |
| H-H_ | 0 | -4.01847400 | 1.06184400  | -6.09087800 | L |
| H-H_ | 0 | 6.91761500  | -3.74942600 | -2.87918300 | L |
| H-H_ | 0 | 2.41584100  | 4.89309600  | -5.11790200 | L |
| H-H_ | 0 | 0.27796700  | -5.45611500 | -3.46007600 | L |
| H-H_ | 0 | -4.33305800 | 0.19787100  | -4.55009800 | L |
| H-H_ | 0 | 1.28442900  | 5.00873900  | -3.72949400 | L |
| H-H_ | 0 | 5.97700200  | -4.37276500 | -1.48598300 | L |
| H-H_ | 0 | 0.26496100  | -3.99178200 | -4.50640200 | L |
| H-H_ | 0 | 6.79676800  | -2.77326200 | -1.37187100 | L |

|         |   |             |             |             |   |
|---------|---|-------------|-------------|-------------|---|
| H-H_    | 0 | 1.55590000  | 3.43470000  | -4.55942600 | L |
| H-H_    | 0 | -2.65930100 | 0.33016200  | -5.19889400 | L |
| H-H_    | 0 | 1.95811600  | 4.17877300  | -1.47892200 | L |
| H-H_    | 0 | -3.79707100 | 1.26449700  | -2.37327200 | L |
| H-H_    | 0 | -0.98927900 | -4.43738400 | -1.60448500 | L |
| H-H_    | 0 | 4.71312600  | -1.58836200 | -0.79955300 | L |
| N-N_R   | 0 | 3.77924100  | 3.29108000  | -0.92020900 | L |
| N-N_R   | 0 | -2.98043800 | 3.16631500  | -2.02276500 | L |
| N-N_R   | 0 | -2.88304600 | -3.53365200 | -1.64603900 | L |
| N-N_R   | 0 | 3.74371500  | -3.42513200 | -0.50975300 | L |
| O-O_R   | 0 | 1.33603300  | 1.74158000  | -0.91190700 | H |
| O-O_R   | 0 | -1.45287300 | 0.83127200  | -1.36612800 | H |
| O-O_R   | 0 | -0.59458700 | -1.93663000 | -1.10943000 | H |
| O-O_R   | 0 | 2.18803400  | -1.04372300 | -0.67316400 | H |
| O-O_R   | 0 | 1.84398900  | 1.52237000  | -3.11713300 | H |
| O-O_R   | 0 | -0.95538200 | 0.87614600  | -3.58251200 | H |
| O-O_R   | 0 | -0.34922700 | -1.95626000 | -3.37007700 | H |
| O-O_R   | 0 | 2.44495100  | -1.32768500 | -2.91223500 | H |
| O-O_R   | 0 | 4.58167400  | 1.11493700  | -1.44118400 | L |
| O-O_R   | 0 | -4.83057300 | 2.77703500  | -0.58698600 | L |
| O-O_R   | 0 | -2.63988200 | -4.88728500 | 0.28527200  | L |
| O-O_R   | 0 | 1.77778500  | -4.25381800 | -1.55567400 | L |
| O-O_R   | 0 | 3.17328000  | 4.98168500  | 0.62986500  | L |
| O-O_R   | 0 | -0.77136000 | 3.93240900  | -2.42910700 | L |
| O-O_R   | 0 | -3.53993000 | -1.49241500 | -2.66082600 | L |
| O-O_R   | 0 | 5.22186300  | -3.08739100 | 1.31545400  | L |
| Rh-     | 0 | 0.34966200  | -0.11378400 | -0.89362100 | H |
| Rh-     | 0 | 0.75379600  | -0.22040500 | -3.28040700 | H |
| N-N_3   | 0 | 0.03215900  | -0.09863400 | 1.10899400  | H |
| S-S_3+6 | 0 | -0.37927000 | -1.45083800 | 2.01071800  | H |
| O-O_2   | 0 | -0.37680800 | -1.11719600 | 3.44709100  | H |
| O-O_R   | 0 | -2.00775200 | -1.70205300 | 1.53484700  | H |
| O-O_2   | 0 | 0.30920600  | -2.64731900 | 1.51044800  | H |
| C-C_R   | 0 | -2.99895700 | -0.99673200 | 2.21963500  | H |
| C-C_R   | 0 | -3.58303000 | 0.12396900  | 1.61544300  | H |
| C-C_R   | 0 | -3.46920100 | -1.46535600 | 3.45662500  | H |
| C-C_R   | 0 | -4.64665300 | 0.77294900  | 2.26014000  | H |
| H-H_    | 0 | -3.20764700 | 0.46646700  | 0.64850000  | H |
| C-C_R   | 0 | -4.53433000 | -0.80637000 | 4.07723500  | H |
| H-H_    | 0 | -3.00526600 | -2.34273200 | 3.91032300  | H |
| C-C_R   | 0 | -5.15026400 | 0.32683800  | 3.49912200  | H |
| H-H_    | 0 | -5.09265400 | 1.64306200  | 1.77720300  | H |
| H-H_    | 0 | -4.89166500 | -1.19077800 | 5.03660100  | H |
| C-C_3   | 0 | -6.31548500 | 1.02755400  | 4.22669800  | H |

|       |   |             |             |            |   |
|-------|---|-------------|-------------|------------|---|
| C-C_3 | 0 | -5.81775500 | 1.54571700  | 5.60230800 | H |
| H-H_  | 0 | -5.45054500 | 0.72613500  | 6.24056300 | H |
| H-H_  | 0 | -6.63787800 | 2.05004200  | 6.14191000 | H |
| H-H_  | 0 | -4.99446100 | 2.26845800  | 5.47762000 | H |
| C-C_3 | 0 | -6.86833500 | 2.22885100  | 3.42944600 | H |
| H-H_  | 0 | -7.70594600 | 2.68649100  | 3.98132200 | H |
| H-H_  | 0 | -7.24971700 | 1.92585600  | 2.43991200 | H |
| H-H_  | 0 | -6.10464000 | 3.01030600  | 3.28241700 | H |
| C-C_3 | 0 | -7.47539200 | 0.02134500  | 4.44683400 | H |
| H-H_  | 0 | -8.29711300 | 0.50272800  | 5.00442400 | H |
| H-H_  | 0 | -7.15317800 | -0.86126200 | 5.02191100 | H |
| H-H_  | 0 | -7.87975100 | -0.33271400 | 3.48483000 | H |
| C-C_R | 0 | 2.70358900  | 1.43424800  | 3.35211700 | H |
| C-C_R | 0 | 3.12926900  | 1.86529500  | 4.62423300 | H |
| C-C_R | 0 | 3.95102100  | 1.05848900  | 5.42416300 | H |
| C-C_R | 0 | 4.35948200  | -0.20086300 | 4.96201600 | H |
| C-C_R | 0 | 3.94391100  | -0.64104300 | 3.69666200 | H |
| C-C_R | 0 | 3.12939400  | 0.17078100  | 2.89501500 | H |
| H-H_  | 0 | 2.82358000  | 2.85294100  | 4.98561300 | H |
| H-H_  | 0 | 4.27632400  | 1.41728400  | 6.40514500 | H |
| H-H_  | 0 | 5.00160900  | -0.83380300 | 5.58113700 | H |
| H-H_  | 0 | 4.25728300  | -1.62127200 | 3.33087800 | H |
| H-H_  | 0 | 2.82811500  | -0.17727800 | 1.90265900 | H |
| C-C_3 | 0 | 1.82965300  | 2.32154000  | 2.48832600 | H |
| H-H_  | 0 | 2.01241700  | 3.38181300  | 2.76447900 | H |
| H-H_  | 0 | 2.11802100  | 2.22483100  | 1.42937700 | H |
| C-C_3 | 0 | 0.30896200  | 2.10853500  | 2.57054100 | H |
| H-H_  | 0 | 0.15465700  | 0.97212400  | 1.91215100 | H |
| C-C_3 | 0 | -0.47226700 | 3.07461900  | 1.69313700 | H |
| H-H_  | 0 | -0.43264300 | 4.08912100  | 2.13685100 | H |
| H-H_  | 0 | -1.53302400 | 2.78575800  | 1.62651800 | H |
| H-H_  | 0 | -0.05518300 | 3.12979200  | 0.67686000 | H |
| C-C_3 | 0 | -0.27882900 | 1.91500500  | 3.95330900 | H |
| H-H_  | 0 | -0.19549500 | 2.86603400  | 4.51917700 | H |
| H-H_  | 0 | 0.24439500  | 1.13607000  | 4.52338600 | H |
| H-H_  | 0 | -1.34699500 | 1.65459100  | 3.90193400 | H |

### **<sup>3</sup>INT4**

|       |   |             |             |             |   |
|-------|---|-------------|-------------|-------------|---|
| C-C_R | 0 | 1.21467100  | -5.54027000 | 1.38848700  | L |
| C-C_R | 0 | -4.26788100 | 4.68284000  | 1.23804200  | L |
| C-C_R | 0 | 6.14137300  | 3.58206700  | 1.71730700  | L |
| C-C_R | 0 | -5.86953800 | -1.21286000 | -1.01707500 | L |
| C-C_3 | 0 | 4.82488800  | -2.92726900 | -2.51839200 | L |
| C-C_3 | 0 | 2.92338900  | 4.15295500  | -3.26331600 | L |

|       |   |             |             |             |   |
|-------|---|-------------|-------------|-------------|---|
| C-C_3 | 0 | -3.37608300 | 2.40383200  | -4.26984300 | L |
| C-C_3 | 0 | -1.74209200 | -4.59859300 | -3.56746300 | L |
| C-C_3 | 0 | 1.61961500  | 4.41644700  | -4.05276700 | L |
| C-C_3 | 0 | 6.07026500  | -3.64347500 | -1.94220400 | L |
| C-C_3 | 0 | -2.51545500 | -5.90941000 | -3.28766500 | L |
| C-C_3 | 0 | -2.30119100 | 3.36751100  | -4.82311500 | L |
| C-C_3 | 0 | 4.03078900  | -3.95560400 | -3.35712500 | L |
| C-C_3 | 0 | -2.45696600 | -3.86582300 | -4.72659300 | L |
| C-C_3 | 0 | 3.91735900  | 3.38413600  | -4.16625000 | L |
| C-C_3 | 0 | -4.73408600 | 3.14735500  | -4.28221900 | L |
| C-C_3 | 0 | 3.55128600  | 5.52947000  | -2.93852400 | L |
| C-C_3 | 0 | -0.31492700 | -4.99310300 | -4.01716600 | L |
| C-C_3 | 0 | -3.51716400 | 1.18688900  | -5.21645400 | L |
| C-C_3 | 0 | 5.33703600  | -1.79906600 | -3.44540400 | L |
| C-C_R | 0 | -1.76672900 | 1.13838800  | -2.57935900 | H |
| C-C_R | 0 | -0.85154400 | -2.47025600 | -2.25405300 | H |
| C-C_R | 0 | 2.73202900  | -1.52081100 | -1.67199000 | H |
| C-C_R | 0 | 1.81552600  | 2.09925900  | -2.00617200 | H |
| C-C_3 | 0 | -3.05865700 | 1.94044600  | -2.79839300 | L |
| C-C_3 | 0 | -1.68986500 | -3.75140100 | -2.24094600 | L |
| C-C_3 | 0 | 3.98508200  | -2.33317000 | -1.32494200 | L |
| C-C_3 | 0 | 2.61165500  | 3.40514900  | -1.91090000 | L |
| C-C_R | 0 | -2.01390400 | 3.87174300  | -1.38421300 | L |
| C-C_R | 0 | -3.59702900 | -3.90859600 | -0.50089400 | L |
| C-C_R | 0 | 4.05655600  | -3.41176300 | 1.02092400  | L |
| C-C_R | 0 | 4.77469200  | 2.10600500  | -1.22617700 | L |
| C-C_R | 0 | -2.38704900 | 4.52727900  | -0.13566400 | L |
| C-C_R | 0 | -4.73741800 | -3.06801300 | -0.14111900 | L |
| C-C_R | 0 | 3.14400700  | -4.25450300 | 1.78923600  | L |
| C-C_R | 0 | 5.72359400  | 2.18543400  | -0.11995100 | L |
| C-C_R | 0 | -3.65343200 | 4.21557700  | 0.13685800  | L |
| C-C_R | 0 | -4.90695900 | -2.15137800 | -1.09429400 | L |
| C-C_R | 0 | 2.22364100  | -4.75187200 | 0.96007900  | L |
| C-C_R | 0 | 5.42520200  | 3.25460000  | 0.62075600  | L |
| C-C_R | 0 | -4.15086000 | 3.33285400  | -0.91488400 | L |
| C-C_R | 0 | -3.88907600 | -2.35595500 | -2.12014800 | L |
| C-C_R | 0 | 2.49658100  | -4.25359800 | -0.38455400 | L |
| C-C_R | 0 | 4.26041900  | 3.91079200  | 0.02988100  | L |
| C-C_R | 0 | -1.65322000 | 5.31008600  | 0.68305300  | L |
| C-C_R | 0 | -5.52055400 | -3.10821500 | 0.95382500  | L |
| C-C_R | 0 | 3.12557200  | -4.51376400 | 3.10897600  | L |
| C-C_R | 0 | 6.75050300  | 1.37689900  | 0.19708000  | L |
| C-C_R | 0 | -2.22567100 | 5.79778500  | 1.81413300  | L |
| C-C_R | 0 | -6.55031100 | -2.15019900 | 1.07737400  | L |

|       |   |             |             |             |   |
|-------|---|-------------|-------------|-------------|---|
| C-C_R | 0 | 2.09649700  | -5.33713900 | 3.60458200  | L |
| C-C_R | 0 | 7.51539300  | 1.70259700  | 1.33901500  | L |
| C-C_R | 0 | -3.51981000 | 5.50367700  | 2.11065300  | L |
| C-C_R | 0 | -6.72176900 | -1.21824900 | 0.10794100  | L |
| C-C_R | 0 | 1.13316600  | -5.84711300 | 2.70495600  | L |
| C-C_R | 0 | 7.19353600  | 2.80028600  | 2.07453300  | L |
| F-F_  | 0 | -0.36361500 | 5.60720200  | 0.38289800  | L |
| F-F_  | 0 | -5.32397500 | -4.03918900 | 1.92051600  | L |
| F-F_  | 0 | 4.06841000  | -4.00472500 | 3.93942800  | L |
| F-F_  | 0 | 7.04529400  | 0.28512700  | -0.55199500 | L |
| F-F_  | 0 | -1.50326600 | 6.58455500  | 2.65061800  | L |
| F-F_  | 0 | -7.35788200 | -2.15903100 | 2.16692900  | L |
| F-F_  | 0 | 2.02769000  | -5.63101500 | 4.92653400  | L |
| F-F_  | 0 | 8.56090300  | 0.91877500  | 1.70232100  | L |
| F-F_  | 0 | -4.09226400 | 5.99584300  | 3.23747600  | L |
| F-F_  | 0 | -7.70345700 | -0.28933000 | 0.21868300  | L |
| F-F_  | 0 | 0.12760200  | -6.63477600 | 3.16106300  | L |
| F-F_  | 0 | 7.92362300  | 3.11320700  | 3.17428900  | L |
| F-F_  | 0 | -5.56750100 | 4.39430500  | 1.49548300  | L |
| F-F_  | 0 | -6.02346700 | -0.28560700 | -1.99487000 | L |
| F-F_  | 0 | 0.28822100  | -6.01286300 | 0.51668300  | L |
| F-F_  | 0 | 5.82278900  | 4.67848800  | 2.44992300  | L |
| H-H_  | 0 | -2.53336300 | -6.55965100 | -4.18929400 | L |
| H-H_  | 0 | -2.57260300 | 3.70151800  | -5.84791200 | L |
| H-H_  | 0 | 1.82715300  | 5.01783300  | -4.96431500 | L |
| H-H_  | 0 | 6.71989800  | -4.02834300 | -2.75824600 | L |
| H-H_  | 0 | -3.56876900 | -5.69973000 | -3.00301000 | L |
| H-H_  | 0 | 5.77946100  | -4.50952800 | -1.30994500 | L |
| H-H_  | 0 | -1.30541200 | 2.88842700  | -4.88755400 | L |
| H-H_  | 0 | 0.89367300  | 4.98242900  | -3.43168200 | L |
| H-H_  | 0 | -2.03923000 | -6.47964800 | -2.46073300 | L |
| H-H_  | 0 | 6.67264700  | -2.94599300 | -1.32043900 | L |
| H-H_  | 0 | -2.21428900 | 4.27315200  | -4.18746300 | L |
| H-H_  | 0 | 1.14012900  | 3.47481000  | -4.38555200 | L |
| H-H_  | 0 | -2.43185000 | -4.48683800 | -5.64816300 | L |
| H-H_  | 0 | 4.64423500  | -4.31087500 | -4.21325900 | L |
| H-H_  | 0 | 4.09096900  | 3.94405100  | -5.11070900 | L |
| H-H_  | 0 | -5.02503000 | 3.42712500  | -5.31811600 | L |
| H-H_  | 0 | -1.97941100 | -2.89752800 | -4.97026500 | L |
| H-H_  | 0 | 3.09889400  | -3.52689800 | -3.77384000 | L |
| H-H_  | 0 | 3.54453600  | 2.38089100  | -4.44685500 | L |
| H-H_  | 0 | -4.68591500 | 4.08497000  | -3.68848800 | L |
| H-H_  | 0 | -3.52473000 | -3.68469600 | -4.48641000 | L |
| H-H_  | 0 | 3.76981500  | -4.84790500 | -2.75202600 | L |



|         |   |             |             |             |   |
|---------|---|-------------|-------------|-------------|---|
| H-H_    | 0 | 4.90305600  | 3.26998900  | -3.67033300 | L |
| H-H_    | 0 | -5.53720500 | 2.50539200  | -3.85956800 | L |
| H-H_    | 0 | 6.01130400  | -2.21084500 | -4.22744500 | L |
| H-H_    | 0 | -0.35460600 | -5.67354900 | -4.89530300 | L |
| H-H_    | 0 | 3.73157000  | 6.11251000  | -3.86784900 | L |
| H-H_    | 0 | -3.86493700 | 1.51121200  | -6.22124100 | L |
| H-H_    | 0 | 5.91325100  | -1.04765400 | -2.86525100 | L |
| H-H_    | 0 | 0.22012500  | -5.52375600 | -3.20117800 | L |
| H-H_    | 0 | -4.25965400 | 0.46400600  | -4.81583700 | L |
| H-H_    | 0 | 4.52778800  | 5.41197300  | -2.42228400 | L |
| H-H_    | 0 | 4.51237000  | -1.28105900 | -3.97221100 | L |
| H-H_    | 0 | 2.87978700  | 6.12573000  | -2.28341400 | L |
| H-H_    | 0 | -2.55829900 | 0.65577000  | -5.37001700 | L |
| H-H_    | 0 | 0.28654600  | -4.11188800 | -4.31572700 | L |
| H-H_    | 0 | -3.87206200 | 1.23848800  | -2.51214200 | L |
| H-H_    | 0 | -1.18752200 | -4.40587400 | -1.49325000 | L |
| H-H_    | 0 | 4.65671200  | -1.60473400 | -0.81719200 | L |
| H-H_    | 0 | 1.95844600  | 4.09590100  | -1.33060900 | L |
| N-N_R   | 0 | -3.11112700 | 3.08517700  | -1.86943900 | L |
| N-N_R   | 0 | -3.04178000 | -3.44889000 | -1.73900000 | L |
| N-N_R   | 0 | 3.63444600  | -3.37991400 | -0.34769300 | L |
| N-N_R   | 0 | 3.83592200  | 3.18293400  | -1.12606800 | L |
| O-O_R   | 0 | -1.54665800 | 0.78226600  | -1.36393800 | H |
| O-O_R   | 0 | -0.65317600 | -1.95705300 | -1.09652100 | H |
| O-O_R   | 0 | 2.12598500  | -1.02262500 | -0.65554600 | H |
| O-O_R   | 0 | 1.25241400  | 1.71656200  | -0.91744200 | H |
| O-O_R   | 0 | -1.00814400 | 0.87732400  | -3.56840700 | H |
| O-O_R   | 0 | -0.43344700 | -1.98860400 | -3.35900100 | H |
| O-O_R   | 0 | 2.36512400  | -1.39324700 | -2.88650200 | H |
| O-O_R   | 0 | 1.77585200  | 1.46971500  | -3.11424600 | H |
| O-O_R   | 0 | -0.83981300 | 3.79324900  | -1.82973200 | L |
| O-O_R   | 0 | -2.96132600 | -4.62360400 | 0.31929500  | L |
| O-O_R   | 0 | 4.81677900  | -2.54619500 | 1.53142800  | L |
| O-O_R   | 0 | 4.60998000  | 1.09714200  | -1.96052600 | L |
| O-O_R   | 0 | -5.20382800 | 2.64548400  | -0.83481200 | L |
| O-O_R   | 0 | -3.56579200 | -1.49054700 | -2.97573800 | L |
| O-O_R   | 0 | 1.64532800  | -4.24294400 | -1.31197700 | L |
| O-O_R   | 0 | 3.57652200  | 4.81252500  | 0.58303500  | L |
| Rh-     | 0 | 0.27562200  | -0.12154900 | -0.89394200 | H |
| Rh-     | 0 | 0.68313200  | -0.26184200 | -3.27007400 | H |
| N-N_3   | 0 | -0.04194700 | -0.16956200 | 1.03838200  | H |
| S-S_3+6 | 0 | -0.65779900 | -1.32432800 | 2.02895000  | H |
| O-O_2   | 0 | -0.08618600 | -2.65724900 | 1.77294000  | H |
| O-O_R   | 0 | -2.27865600 | -1.44595900 | 1.44396100  | H |

|       |   |             |             |            |   |
|-------|---|-------------|-------------|------------|---|
| O-O_2 | 0 | -0.71542400 | -0.77616300 | 3.40021500 | H |
| C-C_R | 0 | -3.27433400 | -0.78677300 | 2.15333400 | H |
| C-C_R | 0 | -3.73644400 | -1.29668000 | 3.37628800 | H |
| C-C_R | 0 | -3.87945000 | 0.34123400  | 1.57626700 | H |
| C-C_R | 0 | -4.81512500 | -0.67529700 | 4.01612500 | H |
| H-H_  | 0 | -3.26330500 | -2.18184200 | 3.80495600 | H |
| C-C_R | 0 | -4.94844300 | 0.94902600  | 2.23721800 | H |
| H-H_  | 0 | -3.49969100 | 0.71825900  | 0.62461600 | H |
| C-C_R | 0 | -5.44515400 | 0.46203800  | 3.46956100 | H |
| H-H_  | 0 | -5.16534500 | -1.09676900 | 4.95983000 | H |
| H-H_  | 0 | -5.41116200 | 1.82474000  | 1.77935300 | H |
| C-C_3 | 0 | -6.60001500 | 1.19475900  | 4.17936300 | H |
| C-C_3 | 0 | -6.07942600 | 2.57337200  | 4.66961300 | H |
| H-H_  | 0 | -5.70784100 | 3.18827600  | 3.83517700 | H |
| H-H_  | 0 | -6.88751000 | 3.13343700  | 5.17113900 | H |
| H-H_  | 0 | -5.25120300 | 2.44903100  | 5.38635900 | H |
| C-C_3 | 0 | -7.12886700 | 0.41116300  | 5.40096500 | H |
| H-H_  | 0 | -7.97492900 | 0.95536500  | 5.85212800 | H |
| H-H_  | 0 | -7.48948000 | -0.59205500 | 5.11801400 | H |
| H-H_  | 0 | -6.36074200 | 0.29546000  | 6.18328100 | H |
| C-C_3 | 0 | -7.78418900 | 1.40893700  | 3.20122300 | H |
| H-H_  | 0 | -8.59915000 | 1.95230000  | 3.70889600 | H |
| H-H_  | 0 | -7.49671300 | 1.99885500  | 2.31659600 | H |
| H-H_  | 0 | -8.18643200 | 0.44508200  | 2.84928800 | H |
| C-C_R | 0 | 3.22753800  | 0.45861500  | 3.59003400 | H |
| C-C_R | 0 | 4.61208300  | 0.33738900  | 3.35537700 | H |
| C-C_R | 0 | 5.41733500  | -0.49808400 | 4.13997100 | H |
| C-C_R | 0 | 4.84313900  | -1.24441300 | 5.18036700 | H |
| C-C_R | 0 | 3.46049000  | -1.15449200 | 5.41520500 | H |
| C-C_R | 0 | 2.66170200  | -0.31465200 | 4.62959300 | H |
| H-H_  | 0 | 5.05393200  | 0.91000000  | 2.53822100 | H |
| H-H_  | 0 | 6.49027300  | -0.56796400 | 3.93684300 | H |
| H-H_  | 0 | 5.46406700  | -1.90285800 | 5.79479200 | H |
| H-H_  | 0 | 3.00167500  | -1.75055800 | 6.20965300 | H |
| H-H_  | 0 | 1.58350900  | -0.27047600 | 4.80570700 | H |
| C-C_3 | 0 | 2.37714200  | 1.38452100  | 2.75100900 | H |
| H-H_  | 0 | 1.55680500  | 0.80188200  | 2.28005200 | H |
| C-C_3 | 0 | 1.72851900  | 2.56799700  | 3.52089800 | H |
| C-C_3 | 0 | 2.79252900  | 3.52536100  | 4.08636200 | H |
| H-H_  | 0 | 3.35974100  | 4.00483500  | 3.26980000 | H |
| H-H_  | 0 | 2.32554300  | 4.32822800  | 4.68183900 | H |
| H-H_  | 0 | 3.51280900  | 2.99615700  | 4.73089100 | H |
| C-C_3 | 0 | 0.73105500  | 3.31490300  | 2.61857700 | H |
| H-H_  | 0 | 1.23760900  | 3.72969300  | 1.72985400 | H |

|      |   |             |            |            |   |
|------|---|-------------|------------|------------|---|
| H-H_ | 0 | -0.06740200 | 2.64461100 | 2.26157300 | H |
| H-H_ | 0 | 0.25938100  | 4.15385700 | 3.15844800 | H |
| H-H_ | 0 | 1.16373700  | 2.14156000 | 4.37124900 | H |
| H-H_ | 0 | 2.97942800  | 1.78715400 | 1.91622400 | H |

### **<sup>3</sup>TS4**

|       |   |             |             |             |   |
|-------|---|-------------|-------------|-------------|---|
| C-C_R | 0 | 2.48815700  | -5.16466200 | 1.47719500  | L |
| C-C_R | 0 | -5.10592300 | 4.03760200  | 1.04391400  | L |
| C-C_R | 0 | 4.81785300  | 4.15795400  | 2.20163900  | L |
| C-C_R | 0 | -5.43446300 | -2.23147800 | -0.95105100 | L |
| C-C_3 | 0 | 5.35210700  | -1.96490300 | -2.64020200 | L |
| C-C_3 | 0 | 2.20986500  | 4.60923600  | -3.27989100 | L |
| C-C_3 | 0 | -3.71860700 | 1.65343900  | -4.26397900 | L |
| C-C_3 | 0 | -0.78884400 | -4.87520500 | -3.50638800 | L |
| C-C_3 | 0 | 0.91514000  | 4.63155900  | -4.12683800 | L |
| C-C_3 | 0 | 6.73297300  | -2.41817700 | -2.10759700 | L |
| C-C_3 | 0 | -1.29838200 | -6.30525100 | -3.20677600 | L |
| C-C_3 | 0 | -2.85788600 | 2.79376500  | -4.85634800 | L |
| C-C_3 | 0 | 4.74309900  | -3.13873000 | -3.44174600 | L |
| C-C_3 | 0 | -1.63439400 | -4.30559800 | -4.66909100 | L |
| C-C_3 | 0 | 3.36348800  | 4.02619900  | -4.12923800 | L |
| C-C_3 | 0 | -5.19504400 | 2.11953100  | -4.27243700 | L |
| C-C_3 | 0 | 2.56638800  | 6.07676200  | -2.94272100 | L |
| C-C_3 | 0 | 0.68557900  | -4.99663800 | -3.96045600 | L |
| C-C_3 | 0 | -3.63195500 | 0.41072100  | -5.18329900 | L |
| C-C_3 | 0 | 5.60107600  | -0.76784500 | -3.58922900 | L |
| C-C_R | 0 | -1.87877800 | 0.76312700  | -2.56818300 | H |
| C-C_R | 0 | -0.30649200 | -2.60318300 | -2.21957800 | H |
| C-C_R | 0 | 3.05473500  | -0.98649200 | -1.73192700 | H |
| C-C_R | 0 | 1.45313900  | 2.38989600  | -2.03414400 | H |
| C-C_3 | 0 | -3.30302800 | 1.29164700  | -2.78699100 | L |
| C-C_3 | 0 | -0.89261700 | -4.01772400 | -2.18983200 | L |
| C-C_3 | 0 | 4.45258300  | -1.53561000 | -1.42098700 | L |
| C-C_3 | 0 | 1.97748700  | 3.82584700  | -1.93347100 | L |
| C-C_R | 0 | -2.69418100 | 3.49721000  | -1.51457100 | L |
| C-C_R | 0 | -2.72232200 | -4.48129700 | -0.42343400 | L |
| C-C_R | 0 | 4.85392200  | -2.55776800 | 0.90340500  | L |
| C-C_R | 0 | 4.29566600  | 2.95740200  | -1.11451900 | L |
| C-C_R | 0 | -3.23338400 | 4.18678000  | -0.34462600 | L |
| C-C_R | 0 | -3.98366600 | -3.83966100 | -0.05747100 | L |
| C-C_R | 0 | 4.19080700  | -3.56085700 | 1.73143700  | L |
| C-C_R | 0 | 5.00790400  | 3.02597900  | 0.15744600  | L |
| C-C_R | 0 | -4.38513600 | 3.60589500  | -0.00581500 | L |
| C-C_R | 0 | -4.32639800 | -2.99285400 | -1.02809000 | L |

|       |   |             |             |             |   |
|-------|---|-------------|-------------|-------------|---|
| C-C_R | 0 | 3.29116800  | -4.20020500 | 0.98015200  | L |
| C-C_R | 0 | 4.39997600  | 3.91716600  | 0.94065800  | L |
| C-C_R | 0 | -4.63883100 | 2.50975300  | -0.93455000 | L |
| C-C_R | 0 | -3.30768700 | -3.04742300 | -2.07173000 | L |
| C-C_R | 0 | 3.35896600  | -3.65977100 | -0.37465700 | L |
| C-C_R | 0 | 3.26838600  | 4.47817600  | 0.20706800  | L |
| C-C_R | 0 | -2.73058300 | 5.22862600  | 0.35069200  | L |
| C-C_R | 0 | -4.72710300 | -3.98247300 | 1.05652000  | L |
| C-C_R | 0 | 4.36076000  | -3.84578900 | 3.03479500  | L |
| C-C_R | 0 | 6.07483800  | 2.32786000  | 0.58646500  | L |
| C-C_R | 0 | -3.41809600 | 5.69646000  | 1.42476400  | L |
| C-C_R | 0 | -5.90222200 | -3.20970800 | 1.18233800  | L |
| C-C_R | 0 | 3.54838400  | -4.84739400 | 3.60052900  | L |
| C-C_R | 0 | 6.53731700  | 2.57340400  | 1.89793300  | L |
| C-C_R | 0 | -4.59688200 | 5.12432300  | 1.78842000  | L |
| C-C_R | 0 | -6.24963200 | -2.34863300 | 0.19483000  | L |
| C-C_R | 0 | 2.59902700  | -5.50340000 | 2.78385300  | L |
| C-C_R | 0 | 5.89512200  | 3.48223600  | 2.67896600  | L |
| F-F_  | 0 | -1.55457400 | 5.79967400  | -0.01338600 | L |
| F-F_  | 0 | -4.35566200 | -4.83947900 | 2.04011000  | L |
| F-F_  | 0 | 5.27655500  | -3.18607200 | 3.78669400  | L |
| F-F_  | 0 | 6.68353000  | 1.41163900  | -0.20728300 | L |
| F-F_  | 0 | -2.92538100 | 6.73950400  | 2.13874000  | L |
| F-F_  | 0 | -6.67472900 | -3.32456700 | 2.29119900  | L |
| F-F_  | 0 | 3.67090100  | -5.17292100 | 4.91114300  | L |
| F-F_  | 0 | 7.60812300  | 1.89398100  | 2.37884200  | L |
| F-F_  | 0 | -5.28333900 | 5.59416600  | 2.85969400  | L |
| F-F_  | 0 | -7.37415700 | -1.59903800 | 0.30539300  | L |
| F-F_  | 0 | 1.80209300  | -6.46723600 | 3.30879000  | L |
| F-F_  | 0 | 6.32796800  | 3.70993900  | 3.94434300  | L |
| F-F_  | 0 | -6.28942000 | 3.46179500  | 1.37083100  | L |
| F-F_  | 0 | -5.76810700 | -1.37698200 | -1.94990300 | L |
| F-F_  | 0 | 1.57947300  | -5.78532700 | 0.68294300  | L |
| F-F_  | 0 | 4.17302300  | 5.05947600  | 2.98384500  | L |
| H-H_  | 0 | -1.19917600 | -6.95738400 | -4.10173600 | L |
| H-H_  | 0 | -3.18423000 | 3.02409100  | -5.89361000 | L |
| H-H_  | 0 | 1.04754500  | 5.26727700  | -5.02905700 | L |
| H-H_  | 0 | 7.41646300  | -2.67683600 | -2.94543700 | L |
| H-H_  | 0 | -2.37031300 | -6.29495100 | -2.91460300 | L |
| H-H_  | 0 | 6.64002900  | -3.31867600 | -1.46357800 | L |
| H-H_  | 0 | -1.78400600 | 2.52894500  | -4.90141900 | L |
| H-H_  | 0 | 0.06968400  | 5.04826700  | -3.53940500 | L |
| H-H_  | 0 | -0.71723200 | -6.76580900 | -2.37857600 | L |
| H-H_  | 0 | 7.20876100  | -1.60991500 | -1.51080100 | L |

|       |   |             |             |             |   |
|-------|---|-------------|-------------|-------------|---|
| H-H_  | 0 | -2.96459300 | 3.72395700  | -4.26111800 | L |
| H-H_  | 0 | 0.63238000  | 3.62015100  | -4.47993000 | L |
| H-H_  | 0 | -1.49489800 | -4.92127100 | -5.58401000 | L |
| H-H_  | 0 | 5.39592900  | -3.39686500 | -4.30353000 | L |
| H-H_  | 0 | 3.46687800  | 4.59409000  | -5.07919800 | L |
| H-H_  | 0 | -5.54502600 | 2.31327200  | -5.30974200 | L |
| H-H_  | 0 | -1.35061500 | -3.26704000 | -4.92594000 | L |
| H-H_  | 0 | 3.74213600  | -2.89482900 | -3.84740500 | L |
| H-H_  | 0 | 3.19403700  | 2.96622900  | -4.39866400 | L |
| H-H_  | 0 | -5.32352200 | 3.06248600  | -3.69952200 | L |
| H-H_  | 0 | -2.71621900 | -4.32829600 | -4.42444200 | L |
| H-H_  | 0 | 4.65493400  | -4.04757400 | -2.81139500 | L |
| H-H_  | 0 | 4.33272800  | 4.10649400  | -3.59551100 | L |
| H-H_  | 0 | -5.85434400 | 1.34458700  | -3.82462500 | L |
| H-H_  | 0 | 6.33299700  | -1.04101800 | -4.38007800 | L |
| H-H_  | 0 | 0.77337600  | -5.68686500 | -4.82739600 | L |
| H-H_  | 0 | 2.69518200  | 6.67684100  | -3.86975100 | L |
| H-H_  | 0 | -4.03824500 | 0.64123300  | -6.19203700 | L |
| H-H_  | 0 | 6.01474500  | 0.09685200  | -3.02771400 | L |
| H-H_  | 0 | 1.31630000  | -5.40025200 | -3.13997500 | L |
| H-H_  | 0 | -4.22507200 | -0.42893800 | -4.76233600 | L |
| H-H_  | 0 | 3.51568600  | 6.13569300  | -2.36839400 | L |
| H-H_  | 0 | 4.67865200  | -0.44164500 | -4.10730900 | L |
| H-H_  | 0 | 1.76348600  | 6.54873800  | -2.33581700 | L |
| H-H_  | 0 | -2.59108800 | 0.06521100  | -5.33251800 | L |
| H-H_  | 0 | 1.10521200  | -4.02147500 | -4.27757100 | L |
| H-H_  | 0 | -3.96285100 | 0.45277300  | -2.47708100 | L |
| H-H_  | 0 | -0.27480700 | -4.55914000 | -1.43799600 | L |
| H-H_  | 0 | 4.98231500  | -0.68696500 | -0.93188400 | L |
| H-H_  | 0 | 1.16872000  | 4.38126900  | -1.40647500 | L |
| N-N_R | 0 | -3.56715200 | 2.41947300  | -1.87759500 | L |
| N-N_R | 0 | -2.27586100 | -3.96572100 | -1.68379200 | L |
| N-N_R | 0 | 4.34804000  | -2.62252600 | -0.43247700 | L |
| N-N_R | 0 | 3.17622800  | 3.85450200  | -1.07856900 | L |
| O-O_R | 0 | -1.57834500 | 0.47225100  | -1.35213400 | H |
| O-O_R | 0 | -0.19583500 | -2.05728800 | -1.06559300 | H |
| O-O_R | 0 | 2.38392000  | -0.61338900 | -0.70246000 | H |
| O-O_R | 0 | 0.99243300  | 1.90789300  | -0.93497500 | H |
| O-O_R | 0 | -1.09517700 | 0.63911300  | -3.56346400 | H |
| O-O_R | 0 | 0.00126800  | -2.06132500 | -3.33338000 | H |
| O-O_R | 0 | 2.64358400  | -0.93659200 | -2.93668300 | H |
| O-O_R | 0 | 1.52254100  | 1.77309400  | -3.14564800 | H |
| O-O_R | 0 | -1.50841900 | 3.60559600  | -1.92221500 | L |
| O-O_R | 0 | -1.95827600 | -5.05308500 | 0.39960900  | L |

|         |   |             |             |             |   |
|---------|---|-------------|-------------|-------------|---|
| O-O_R   | 0 | 5.92285100  | -1.96640600 | 1.21012300  | L |
| O-O_R   | 0 | 4.39017300  | 1.99597500  | -1.92229800 | L |
| O-O_R   | 0 | -5.53998800 | 1.63877300  | -0.80580000 | L |
| O-O_R   | 0 | -3.15296900 | -2.15987600 | -2.95116700 | L |
| O-O_R   | 0 | 2.47649900  | -3.83491400 | -1.25521100 | L |
| O-O_R   | 0 | 2.32658200  | 5.12744400  | 0.73474300  | L |
| Rh-     | 0 | 0.38171500  | -0.08554000 | -0.90037800 | H |
| Rh-     | 0 | 0.77801600  | -0.14932900 | -3.28661900 | H |
| N-N_3   | 0 | 0.17144100  | -0.10797600 | 1.09661000  | H |
| S-S_3+6 | 0 | -0.22082300 | -1.40489900 | 2.06721300  | H |
| O-O_2   | 0 | 0.59465700  | -2.59064100 | 1.76105000  | H |
| O-O_R   | 0 | -1.77876000 | -1.82256600 | 1.49203900  | H |
| O-O_2   | 0 | -0.36167200 | -0.92291900 | 3.45736200  | H |
| C-C_R   | 0 | -2.87672300 | -1.29864900 | 2.17720300  | H |
| C-C_R   | 0 | -3.29206600 | -1.87289400 | 3.38549200  | H |
| C-C_R   | 0 | -3.60899200 | -0.25399000 | 1.59488100  | H |
| C-C_R   | 0 | -4.44964100 | -1.39505900 | 4.01376000  | H |
| H-H_    | 0 | -2.71609000 | -2.69292200 | 3.81804900  | H |
| C-C_R   | 0 | -4.75580800 | 0.21205700  | 2.24446400  | H |
| H-H_    | 0 | -3.26997000 | 0.17165300  | 0.64816900  | H |
| C-C_R   | 0 | -5.20605800 | -0.34024100 | 3.46490300  | H |
| H-H_    | 0 | -4.75780000 | -1.86359200 | 4.95018000  | H |
| H-H_    | 0 | -5.31463900 | 1.03163100  | 1.78920900  | H |
| C-C_3   | 0 | -6.45845500 | 0.23793900  | 4.15402700  | H |
| C-C_3   | 0 | -6.15381100 | 1.69369300  | 4.59900400  | H |
| H-H_    | 0 | -5.87084400 | 2.33024700  | 3.74597500  | H |
| H-H_    | 0 | -7.03973300 | 2.14432900  | 5.07910200  | H |
| H-H_    | 0 | -5.32203800 | 1.71731200  | 5.32230000  | H |
| C-C_3   | 0 | -6.87001000 | -0.57491700 | 5.40093900  | H |
| H-H_    | 0 | -7.78187500 | -0.14041700 | 5.84321000  | H |
| H-H_    | 0 | -7.08973300 | -1.62602300 | 5.14915200  | H |
| H-H_    | 0 | -6.08916800 | -0.56167900 | 6.17932300  | H |
| C-C_3   | 0 | -7.65592800 | 0.23895000  | 3.16869300  | H |
| H-H_    | 0 | -8.54456800 | 0.68151800  | 3.65053400  | H |
| H-H_    | 0 | -7.44735500 | 0.82274800  | 2.25814300  | H |
| H-H_    | 0 | -7.91256100 | -0.78749000 | 2.85990500  | H |
| C-C_R   | 0 | 2.43393300  | 1.07266400  | 3.38229700  | H |
| C-C_R   | 0 | 3.68051600  | 0.69359200  | 2.81734000  | H |
| C-C_R   | 0 | 4.66512300  | 0.07379000  | 3.58822600  | H |
| C-C_R   | 0 | 4.42252600  | -0.21501200 | 4.94206700  | H |
| C-C_R   | 0 | 3.17952300  | 0.11234700  | 5.51018800  | H |
| C-C_R   | 0 | 2.19608800  | 0.74085600  | 4.74251800  | H |
| H-H_    | 0 | 3.85632700  | 0.89084800  | 1.75699200  | H |
| H-H_    | 0 | 5.62882700  | -0.18205700 | 3.14125900  | H |

|       |   |             |             |            |   |
|-------|---|-------------|-------------|------------|---|
| H-H_  | 0 | 5.19243700  | -0.70289700 | 5.54618200 | H |
| H-H_  | 0 | 2.97715500  | -0.12727500 | 6.55781000 | H |
| H-H_  | 0 | 1.23142800  | 0.97697300  | 5.19479300 | H |
| C-C_3 | 0 | 1.43842300  | 1.76272200  | 2.54048900 | H |
| H-H_  | 0 | 0.82390200  | 0.83673200  | 1.89159600 | H |
| C-C_3 | 0 | 0.33410100  | 2.61415100  | 3.17271300 | H |
| C-C_3 | 0 | 0.93766700  | 3.83259800  | 3.91301400 | H |
| H-H_  | 0 | 1.45331900  | 4.50479400  | 3.20739600 | H |
| H-H_  | 0 | 0.13905100  | 4.41335400  | 4.40517700 | H |
| H-H_  | 0 | 1.66596400  | 3.52574400  | 4.67988300 | H |
| C-C_3 | 0 | -0.68980400 | 3.07882700  | 2.12194600 | H |
| H-H_  | 0 | -0.20425600 | 3.68268400  | 1.33661600 | H |
| H-H_  | 0 | -1.18297200 | 2.22599400  | 1.63145900 | H |
| H-H_  | 0 | -1.46918800 | 3.69762900  | 2.59632600 | H |
| H-H_  | 0 | -0.20299700 | 1.99274800  | 3.91151400 | H |
| H-H_  | 0 | 1.90076900  | 2.25234400  | 1.66651300 | H |

### **<sup>3</sup>INT5**

|       |   |             |             |             |   |
|-------|---|-------------|-------------|-------------|---|
| C-C_R | 0 | -5.76942600 | -1.46916600 | -0.47223400 | L |
| C-C_R | 0 | 5.46598300  | 3.64475400  | 2.13643600  | L |
| C-C_R | 0 | 3.06605300  | -4.67125800 | 3.07319800  | L |
| C-C_R | 0 | -1.18537600 | 5.92869700  | -0.56500400 | L |
| C-C_3 | 0 | -1.82540900 | -4.76535200 | -3.36956800 | L |
| C-C_3 | 0 | 4.88755800  | -3.08405800 | -2.54998000 | L |
| C-C_3 | 0 | 3.26960400  | 3.75304700  | -3.45646600 | L |
| C-C_3 | 0 | -3.46490200 | 1.99300600  | -4.28744000 | L |
| C-C_3 | 0 | 5.36786800  | -1.92319500 | -3.45433100 | L |
| C-C_3 | 0 | -2.60376800 | -6.06175700 | -3.03962600 | L |
| C-C_3 | 0 | -4.81789400 | 2.74424200  | -4.26519000 | L |
| C-C_3 | 0 | 4.28934800  | 2.80278100  | -4.12765600 | L |
| C-C_3 | 0 | -2.61185300 | -4.00587000 | -4.46356700 | L |
| C-C_3 | 0 | -2.47019600 | 2.83572900  | -5.12032600 | L |
| C-C_3 | 0 | 4.11894000  | -4.11588100 | -3.40729400 | L |
| C-C_3 | 0 | 3.97694900  | 5.10853200  | -3.21345400 | L |
| C-C_3 | 0 | 6.15085400  | -3.77907400 | -1.98751800 | L |
| C-C_3 | 0 | -3.70703000 | 0.63926800  | -4.99674300 | L |
| C-C_3 | 0 | 2.09735900  | 4.02104400  | -4.43035900 | L |
| C-C_3 | 0 | -0.44761800 | -5.18986600 | -3.93259800 | L |
| C-C_R | 0 | 1.91509500  | 1.90486500  | -2.11066700 | H |
| C-C_R | 0 | -1.70059400 | 0.95752700  | -2.59147900 | H |
| C-C_R | 0 | -0.82124700 | -2.64414600 | -2.12424800 | H |
| C-C_R | 0 | 2.77626500  | -1.72597300 | -1.67714800 | H |
| C-C_3 | 0 | 2.74166500  | 3.19951800  | -2.07819500 | L |
| C-C_3 | 0 | -2.98505100 | 1.76696100  | -2.80323900 | L |

|       |   |             |             |             |   |
|-------|---|-------------|-------------|-------------|---|
| C-C_3 | 0 | -1.65132100 | -3.92940500 | -2.04566200 | L |
| C-C_3 | 0 | 4.03456500  | -2.53542800 | -1.34577500 | L |
| C-C_R | 0 | 4.64897900  | 1.90644800  | -0.85098700 | L |
| C-C_R | 0 | -3.70823100 | 3.45018600  | -0.98224000 | L |
| C-C_R | 0 | -3.40805100 | -4.12874000 | -0.15570700 | L |
| C-C_R | 0 | 2.54616000  | -4.47159000 | -0.44723500 | L |
| C-C_R | 0 | 5.32331300  | 2.05342200  | 0.43399200  | L |
| C-C_R | 0 | -3.11933100 | 4.62337300  | -0.34146800 | L |
| C-C_R | 0 | -4.53704600 | -3.31982500 | 0.29795600  | L |
| C-C_R | 0 | 2.23362800  | -4.94019100 | 0.89869000  | L |
| C-C_R | 0 | 5.00195900  | 3.24466800  | 0.93917500  | L |
| C-C_R | 0 | -1.97132100 | 4.90878400  | -0.95803300 | L |
| C-C_R | 0 | -4.79356800 | -2.38946700 | -0.62504100 | L |
| C-C_R | 0 | 3.13662700  | -4.44524400 | 1.74397100  | L |
| C-C_R | 0 | 4.09652200  | 3.91783700  | 0.00956800  | L |
| C-C_R | 0 | -1.78071200 | 3.95647700  | -2.04733900 | L |
| C-C_R | 0 | -3.84336300 | -2.55332500 | -1.72147300 | L |
| C-C_R | 0 | 4.08391300  | -3.63588300 | 0.98291900  | L |
| C-C_R | 0 | 6.11977200  | 1.18881600  | 1.09720600  | L |
| C-C_R | 0 | -3.56184700 | 5.34363800  | 0.70603100  | L |
| C-C_R | 0 | -5.23884300 | -3.39721200 | 1.44296100  | L |
| C-C_R | 0 | 1.20584300  | -5.69237100 | 1.33188200  | L |
| C-C_R | 0 | 6.61681200  | 1.54914600  | 2.30861300  | L |
| C-C_R | 0 | -2.77538500 | 6.42736900  | 1.15398600  | L |
| C-C_R | 0 | -6.27641600 | -2.46676400 | 1.64395900  | L |
| C-C_R | 0 | 1.11698100  | -5.94941100 | 2.71748800  | L |
| C-C_R | 0 | 6.31102500  | 2.76100900  | 2.84355900  | L |
| C-C_R | 0 | -1.60676000 | 6.71483400  | 0.52927300  | L |
| C-C_R | 0 | -6.52637600 | -1.49309300 | 0.65041600  | L |
| C-C_R | 0 | 2.05074600  | -5.43160600 | 3.55907000  | L |
| F-F_  | 0 | 6.41723400  | -0.02409200 | 0.56679000  | L |
| F-F_  | 0 | -4.72788200 | 5.03405400  | 1.32478900  | L |
| F-F_  | 0 | -4.95704300 | -4.33720600 | 2.37924800  | L |
| F-F_  | 0 | 0.27844100  | -6.18151400 | 0.47136300  | L |
| F-F_  | 0 | 7.41622700  | 0.69215200  | 2.99190800  | L |
| F-F_  | 0 | -3.18635200 | 7.17327500  | 2.20956700  | L |
| F-F_  | 0 | -7.01756300 | -2.49975500 | 2.77864900  | L |
| F-F_  | 0 | 0.09875000  | -6.70125100 | 3.20489800  | L |
| F-F_  | 0 | 6.80279100  | 3.11633600  | 4.05656100  | L |
| F-F_  | 0 | -0.84128500 | 7.75001900  | 0.95578800  | L |
| F-F_  | 0 | -7.51337900 | -0.57989600 | 0.82628700  | L |
| F-F_  | 0 | 1.96387000  | -5.66927600 | 4.89194500  | L |
| F-F_  | 0 | 5.12716700  | 4.85087300  | 2.65605100  | L |
| F-F_  | 0 | -0.01756600 | 6.19730300  | -1.20116700 | L |



|       |   |             |             |             |   |
|-------|---|-------------|-------------|-------------|---|
| F-F_  | 0 | -5.98978800 | -0.52978900 | -1.42641700 | L |
| F-F_  | 0 | 3.99049300  | -4.14368000 | 3.91462700  | L |
| H-H_  | 0 | -5.21849700 | 2.87098900  | -5.29452300 | L |
| H-H_  | 0 | 4.64485000  | 3.23535600  | -5.08789000 | L |
| H-H_  | 0 | 6.06824200  | -2.29695200 | -4.23249100 | L |
| H-H_  | 0 | -2.69985500 | -6.70701600 | -3.93988800 | L |
| H-H_  | 0 | -4.70744400 | 3.75718600  | -3.82241300 | L |
| H-H_  | 0 | -3.62994100 | -5.83330100 | -2.68025100 | L |
| H-H_  | 0 | 3.85452400  | 1.81133700  | -4.35769800 | L |
| H-H_  | 0 | 5.90358600  | -1.15573400 | -2.85584700 | L |
| H-H_  | 0 | -5.57014000 | 2.18349400  | -3.66898400 | L |
| H-H_  | 0 | -2.08109200 | -6.64509800 | -2.25073900 | L |
| H-H_  | 0 | 5.18010800  | 2.65498800  | -3.48271200 | L |
| H-H_  | 0 | 4.53012300  | -1.43141600 | -3.98604500 | L |
| H-H_  | 0 | -2.83551400 | 2.94126300  | -6.16480900 | L |
| H-H_  | 0 | -2.66961300 | -4.61676500 | -5.39039200 | L |
| H-H_  | 0 | 4.74208700  | -4.44253100 | -4.26781600 | L |
| H-H_  | 0 | 4.30257700  | 5.56447400  | -4.17375500 | L |
| H-H_  | 0 | -1.46496800 | 2.37528100  | -5.16961500 | L |
| H-H_  | 0 | -2.13570100 | -3.04355400 | -4.73282500 | L |
| H-H_  | 0 | 3.17838900  | -3.70114300 | -3.81883200 | L |
| H-H_  | 0 | 4.88205900  | 4.98248200  | -2.58192500 | L |
| H-H_  | 0 | -2.36935300 | 3.85977900  | -4.70622400 | L |
| H-H_  | 0 | -3.65415500 | -3.80637700 | -4.14074700 | L |
| H-H_  | 0 | 3.87658900  | -5.02314200 | -2.81650700 | L |
| H-H_  | 0 | 3.29397200  | 5.82412600  | -2.70629700 | L |
| H-H_  | 0 | -0.57283800 | -5.86594200 | -4.80608900 | L |
| H-H_  | 0 | -4.12777100 | 0.79959100  | -6.01312100 | L |
| H-H_  | 0 | 6.80657500  | -4.13734800 | -2.81075200 | L |
| H-H_  | 0 | 2.46767100  | 4.48817200  | -5.36864600 | L |
| H-H_  | 0 | 0.13824900  | -5.73623800 | -3.16322600 | L |
| H-H_  | 0 | -4.43270400 | 0.02307600  | -4.42483100 | L |
| H-H_  | 0 | 1.36276100  | 4.71749900  | -3.97354400 | L |
| H-H_  | 0 | 5.88154600  | -4.65997700 | -1.36630500 | L |
| H-H_  | 0 | 0.14921900  | -4.32335000 | -4.27827500 | L |
| H-H_  | 0 | 6.73912700  | -3.07665500 | -1.35791300 | L |
| H-H_  | 0 | 1.56841300  | 3.09244800  | -4.72012300 | L |
| H-H_  | 0 | -2.77307600 | 0.05736800  | -5.12151300 | L |
| H-H_  | 0 | 2.04030200  | 3.97081400  | -1.68732100 | L |
| H-H_  | 0 | -3.78311000 | 1.16386700  | -2.31369500 | L |
| H-H_  | 0 | -1.08321400 | -4.58695400 | -1.35070700 | L |
| H-H_  | 0 | 4.69585200  | -1.81301400 | -0.81787200 | L |
| N-N_R | 0 | 3.84702200  | 3.06491900  | -1.11348700 | L |
| N-N_R | 0 | -2.88354200 | 3.04225100  | -2.07647500 | L |

|         |   |             |             |             |   |
|---------|---|-------------|-------------|-------------|---|
| N-N_R   | 0 | -2.95300400 | -3.63610100 | -1.42085800 | L |
| N-N_R   | 0 | 3.69362500  | -3.60992200 | -0.39584200 | L |
| O-O_R   | 0 | 1.36926700  | 1.57283800  | -0.99340600 | H |
| O-O_R   | 0 | -1.42651500 | 0.68673800  | -1.36597600 | H |
| O-O_R   | 0 | -0.60367800 | -2.08703800 | -0.99128000 | H |
| O-O_R   | 0 | 2.18124100  | -1.21885900 | -0.65937900 | H |
| O-O_R   | 0 | 1.83163200  | 1.24561900  | -3.19642400 | H |
| O-O_R   | 0 | -0.98802700 | 0.62262900  | -3.59254000 | H |
| O-O_R   | 0 | -0.41996700 | -2.20851000 | -3.25530600 | H |
| O-O_R   | 0 | 2.39085300  | -1.60464000 | -2.88667000 | H |
| O-O_R   | 0 | 4.58572600  | 0.83945000  | -1.51537600 | L |
| O-O_R   | 0 | -4.90129600 | 3.07388600  | -0.83476700 | L |
| O-O_R   | 0 | -2.70099500 | -4.84374200 | 0.60374800  | L |
| O-O_R   | 0 | 1.71745800  | -4.46560300 | -1.39484900 | L |
| O-O_R   | 0 | 3.37655600  | 4.90891000  | 0.30484600  | L |
| O-O_R   | 0 | -0.67685100 | 3.73436100  | -2.60954600 | L |
| O-O_R   | 0 | -3.58078000 | -1.65480200 | -2.56280800 | L |
| O-O_R   | 0 | 4.87647700  | -2.80155400 | 1.49580400  | L |
| Rh-     | 0 | 0.36493000  | -0.27028500 | -0.89619800 | H |
| Rh-     | 0 | 0.71232100  | -0.48624200 | -3.27672100 | H |
| N-N_3   | 0 | 0.06621000  | -0.10476700 | 1.12022000  | H |
| S-S_3+6 | 0 | -0.41146800 | -1.32893400 | 2.14726900  | H |
| O-O_2   | 0 | -0.40062700 | -0.83440900 | 3.53717000  | H |
| O-O_R   | 0 | -2.04339300 | -1.56717600 | 1.68305000  | H |
| O-O_2   | 0 | 0.22124600  | -2.59194000 | 1.76340000  | H |
| C-C_R   | 0 | -3.02183900 | -0.77269100 | 2.28108500  | H |
| C-C_R   | 0 | -3.58978700 | 0.27724900  | 1.54809400  | H |
| C-C_R   | 0 | -3.50294500 | -1.08850900 | 3.56182700  | H |
| C-C_R   | 0 | -4.65336600 | 1.00407200  | 2.10284800  | H |
| H-H_    | 0 | -3.20280200 | 0.50357400  | 0.55215200  | H |
| C-C_R   | 0 | -4.56528900 | -0.35208200 | 4.09351700  | H |
| H-H_    | 0 | -3.05081300 | -1.91137900 | 4.11793600  | H |
| C-C_R   | 0 | -5.17158900 | 0.70688700  | 3.38031400  | H |
| H-H_    | 0 | -5.08957900 | 1.81297200  | 1.51545200  | H |
| H-H_    | 0 | -4.93123500 | -0.61776000 | 5.08911600  | H |
| C-C_3   | 0 | -6.34049400 | 1.49110000  | 4.01013600  | H |
| C-C_3   | 0 | -5.83783600 | 2.20363500  | 5.29402100  | H |
| H-H_    | 0 | -5.45401300 | 1.48538600  | 6.03627300  | H |
| H-H_    | 0 | -6.65938800 | 2.76948800  | 5.76633600  | H |
| H-H_    | 0 | -5.02499500 | 2.91098500  | 5.06004800  | H |
| C-C_3   | 0 | -6.91298200 | 2.56027500  | 3.05459100  | H |
| H-H_    | 0 | -7.75800300 | 3.07683100  | 3.53904300  | H |
| H-H_    | 0 | -7.28835000 | 2.11563400  | 2.11772200  | H |
| H-H_    | 0 | -6.16305900 | 3.32620900  | 2.79848900  | H |

|       |   |             |             |            |   |
|-------|---|-------------|-------------|------------|---|
| C-C_3 | 0 | -7.48875900 | 0.51626500  | 4.38112700 | H |
| H-H_  | 0 | -8.31322400 | 1.06688300  | 4.86578700 | H |
| H-H_  | 0 | -7.15707000 | -0.26898200 | 5.07871600 | H |
| H-H_  | 0 | -7.89294800 | 0.02040200  | 3.48393100 | H |
| C-C_R | 0 | 2.81423500  | 1.82095400  | 3.43723300 | H |
| C-C_R | 0 | 3.33717000  | 2.33887900  | 4.63817800 | H |
| C-C_R | 0 | 4.15231200  | 1.55597400  | 5.46813600 | H |
| C-C_R | 0 | 4.45804600  | 0.23554500  | 5.10701700 | H |
| C-C_R | 0 | 3.94508100  | -0.29136600 | 3.91277400 | H |
| C-C_R | 0 | 3.13439900  | 0.49580200  | 3.08243700 | H |
| H-H_  | 0 | 3.11288000  | 3.37357200  | 4.91866600 | H |
| H-H_  | 0 | 4.55432800  | 1.98074900  | 6.39274300 | H |
| H-H_  | 0 | 5.09592200  | -0.37782400 | 5.74980400 | H |
| H-H_  | 0 | 4.17698200  | -1.31968300 | 3.62536800 | H |
| H-H_  | 0 | 2.75416200  | 0.07870700  | 2.14527300 | H |
| C-C_3 | 0 | 1.94466500  | 2.67971800  | 2.53600600 | H |
| H-H_  | 0 | 2.27199400  | 3.74034600  | 2.63949800 | H |
| H-H_  | 0 | 2.13519300  | 2.42328100  | 1.47774400 | H |
| C-C_3 | 0 | 0.44696900  | 2.63750700  | 2.76603100 | H |
| C-C_3 | 0 | -0.38842900 | 3.40684700  | 1.78116500 | H |
| H-H_  | 0 | -0.38517000 | 4.49123600  | 2.03077200 | H |
| H-H_  | 0 | -1.44336700 | 3.08562700  | 1.79552200 | H |
| H-H_  | 0 | -0.00486500 | 3.31479100  | 0.75150700 | H |
| C-C_3 | 0 | -0.11101400 | 2.40825300  | 4.13750600 | H |
| H-H_  | 0 | -0.03962300 | 3.33446600  | 4.75162200 | H |
| H-H_  | 0 | 0.43039300  | 1.61921700  | 4.67882900 | H |
| H-H_  | 0 | -1.17744800 | 2.13501300  | 4.09774500 | H |
| H-H_  | 0 | 0.11764000  | 0.80308200  | 1.63709600 | H |

### **<sup>3</sup>TS5**

|       |   |             |             |             |   |
|-------|---|-------------|-------------|-------------|---|
| C-C_R | 0 | -6.18347800 | -0.91612900 | -0.56288400 | L |
| C-C_R | 0 | 5.96185800  | 2.95052300  | 2.02149800  | L |
| C-C_R | 0 | 2.73640500  | -5.28475000 | 2.74067900  | L |
| C-C_R | 0 | -0.25712800 | 6.04276200  | 0.05744100  | L |
| C-C_3 | 0 | -2.42543100 | -4.24692100 | -3.62409400 | L |
| C-C_3 | 0 | 4.31154800  | -3.36674400 | -2.81914300 | L |
| C-C_3 | 0 | 3.58808500  | 3.60653100  | -3.49587000 | L |
| C-C_3 | 0 | -3.38380600 | 2.84874300  | -3.80402600 | L |
| C-C_3 | 0 | 4.89450000  | -2.21889200 | -3.67820500 | L |
| C-C_3 | 0 | -3.30324400 | -5.50222600 | -3.40375100 | L |
| C-C_3 | 0 | -4.60816300 | 3.78364500  | -3.65414800 | L |
| C-C_3 | 0 | 4.42052700  | 2.53717300  | -4.24149400 | L |
| C-C_3 | 0 | -3.13983200 | -3.34517500 | -4.65794000 | L |
| C-C_3 | 0 | -2.32403500 | 3.59024200  | -4.65246700 | L |

|       |   |             |             |             |   |
|-------|---|-------------|-------------|-------------|---|
| C-C_3 | 0 | 3.37058900  | -4.23218600 | -3.68969600 | L |
| C-C_3 | 0 | 4.49122200  | 4.84499100  | -3.28095300 | L |
| C-C_3 | 0 | 5.50033000  | -4.25502700 | -2.37871200 | L |
| C-C_3 | 0 | -3.86111900 | 1.59081500  | -4.56738800 | L |
| C-C_3 | 0 | 2.40502700  | 4.05226300  | -4.38859400 | L |
| C-C_3 | 0 | -1.07694900 | -4.72756600 | -4.21266700 | L |
| C-C_R | 0 | 2.06324100  | 1.95165100  | -2.08729600 | H |
| C-C_R | 0 | -1.70388600 | 1.46126600  | -2.27739100 | H |
| C-C_R | 0 | -1.26294200 | -2.32856600 | -2.20168200 | H |
| C-C_R | 0 | 2.43978400  | -1.81595000 | -1.73851700 | H |
| C-C_3 | 0 | 3.07254200  | 3.10669400  | -2.09450000 | L |
| C-C_3 | 0 | -2.86150100 | 2.46398100  | -2.36811300 | L |
| C-C_3 | 0 | -2.20194500 | -3.53731600 | -2.23541800 | L |
| C-C_3 | 0 | 3.60024700  | -2.79933000 | -1.53301600 | L |
| C-C_R | 0 | 4.85314100  | 1.52205200  | -1.03650500 | L |
| C-C_R | 0 | -3.19157900 | 4.07443500  | -0.38308500 | L |
| C-C_R | 0 | -3.98879700 | -3.72496400 | -0.37409800 | L |
| C-C_R | 0 | 1.91387200  | -4.57927400 | -0.65411500 | L |
| C-C_R | 0 | 5.57173900  | 1.50208800  | 0.23274000  | L |
| C-C_R | 0 | -2.36529000 | 5.05301800  | 0.31853200  | L |
| C-C_R | 0 | -5.07308400 | -2.87715600 | 0.11318900  | L |
| C-C_R | 0 | 1.66300600  | -5.15881500 | 0.66074200  | L |
| C-C_R | 0 | 5.41964000  | 2.68959800  | 0.81858300  | L |
| C-C_R | 0 | -1.23553400 | 5.22242400  | -0.36947300 | L |
| C-C_R | 0 | -5.25555100 | -1.87782900 | -0.75389600 | L |
| C-C_R | 0 | 2.70701400  | -4.89853000 | 1.44726200  | L |
| C-C_R | 0 | 4.58264400  | 3.52970400  | -0.03566700 | L |
| C-C_R | 0 | -1.29123000 | 4.38571300  | -1.56371400 | L |
| C-C_R | 0 | -4.29053700 | -2.02453300 | -1.84055800 | L |
| C-C_R | 0 | 3.68325200  | -4.13348000 | 0.67528400  | L |
| C-C_R | 0 | 6.26447100  | 0.50188400  | 0.81767800  | L |
| C-C_R | 0 | -2.59492300 | 5.69579200  | 1.47887700  | L |
| C-C_R | 0 | -5.80032300 | -2.98269600 | 1.23974100  | L |
| C-C_R | 0 | 0.58251600  | -5.81331900 | 1.12240400  | L |
| C-C_R | 0 | 6.83625700  | 0.71886200  | 2.03016100  | L |
| C-C_R | 0 | -1.60083200 | 6.57164700  | 1.96714200  | L |
| C-C_R | 0 | -6.78912300 | -2.00956900 | 1.47889500  | L |
| C-C_R | 0 | 0.59295700  | -6.22991000 | 2.47150300  | L |
| C-C_R | 0 | 6.70633300  | 1.92453100  | 2.64459500  | L |
| C-C_R | 0 | -0.45126800 | 6.74198000  | 1.26843500  | L |
| C-C_R | 0 | -6.96695600 | -0.96764200 | 0.54048100  | L |
| C-C_R | 0 | 1.67232600  | -5.95684800 | 3.25177500  | L |
| F-F_  | 0 | 6.38814500  | -0.70352200 | 0.20714400  | L |
| F-F_  | 0 | -3.74272300 | 5.49650800  | 2.17378300  | L |

|      |   |             |             |             |   |
|------|---|-------------|-------------|-------------|---|
| F-F_ | 0 | -5.59245600 | -3.99355900 | 2.11985800  | L |
| F-F_ | 0 | -0.48633500 | -6.05995800 | 0.32445200  | L |
| F-F_ | 0 | 7.53532000  | -0.27466200 | 2.63407500  | L |
| F-F_ | 0 | -1.79372400 | 7.23318100  | 3.13535800  | L |
| F-F_ | 0 | -7.55766100 | -2.07208100 | 2.59395300  | L |
| F-F_ | 0 | -0.47214100 | -6.89395000 | 2.98556900  | L |
| F-F_ | 0 | 7.27414800  | 2.13816600  | 3.85767900  | L |
| F-F_ | 0 | 0.51267600  | 7.57553100  | 1.73267900  | L |
| F-F_ | 0 | -7.91461000 | -0.02031200 | 0.74767800  | L |
| F-F_ | 0 | 1.68429900  | -6.35252200 | 4.54943800  | L |
| F-F_ | 0 | 5.79442100  | 4.15433900  | 2.62347700  | L |
| F-F_ | 0 | 0.88921500  | 6.19325700  | -0.65230900 | L |
| F-F_ | 0 | -6.33160000 | 0.08990700  | -1.46147300 | L |
| F-F_ | 0 | 3.81048600  | -5.00784200 | 3.52166500  | L |
| H-H_ | 0 | -5.04104400 | 4.03302000  | -4.64738300 | L |
| H-H_ | 0 | 4.75809300  | 2.92909500  | -5.22536300 | L |
| H-H_ | 0 | 5.48253000  | -2.62679800 | -4.52884400 | L |
| H-H_ | 0 | -3.44203600 | -6.06127900 | -4.35468000 | L |
| H-H_ | 0 | -4.32573300 | 4.73909300  | -3.16246100 | L |
| H-H_ | 0 | -4.31109300 | -5.22533800 | -3.02692100 | L |
| H-H_ | 0 | 3.84179100  | 1.61418400  | -4.43745000 | L |
| H-H_ | 0 | 5.57385400  | -1.58294400 | -3.07175900 | L |
| H-H_ | 0 | -5.40134100 | 3.29955800  | -3.04393200 | L |
| H-H_ | 0 | -2.83274500 | -6.18773900 | -2.66585500 | L |
| H-H_ | 0 | 5.32942500  | 2.26675000  | -3.66525900 | L |
| H-H_ | 0 | 4.10531700  | -1.57520200 | -4.11281200 | L |
| H-H_ | 0 | -2.72689100 | 3.81096400  | -5.66466300 | L |
| H-H_ | 0 | -3.22818500 | -3.87253900 | -5.63243600 | L |
| H-H_ | 0 | 3.90607900  | -4.59269300 | -4.59456500 | L |
| H-H_ | 0 | 4.82962800  | 5.26331300  | -4.25386300 | L |
| H-H_ | 0 | -1.40128400 | 2.99463900  | -4.78959700 | L |
| H-H_ | 0 | -2.59221200 | -2.40142400 | -4.84344000 | L |
| H-H_ | 0 | 2.48193100  | -3.67011600 | -4.03581800 | L |
| H-H_ | 0 | 5.39885800  | 4.58339600  | -2.69616800 | L |
| H-H_ | 0 | -2.05246900 | 4.56210200  | -4.19180100 | L |
| H-H_ | 0 | -4.16992800 | -3.09796100 | -4.32926600 | L |
| H-H_ | 0 | 3.02611800  | -5.12860700 | -3.13410300 | L |
| H-H_ | 0 | 3.94261100  | 5.64271800  | -2.73463500 | L |
| H-H_ | 0 | -1.24237100 | -5.32074900 | -5.13813800 | L |
| H-H_ | 0 | -4.30807500 | 1.87230200  | -5.54552100 | L |
| H-H_ | 0 | 6.06436300  | -4.62950800 | -3.26059200 | L |
| H-H_ | 0 | 2.77643000  | 4.50776000  | -5.33214600 | L |
| H-H_ | 0 | -0.54081900 | -5.37518400 | -3.48676400 | L |
| H-H_ | 0 | -4.63788100 | 1.05263500  | -3.98390400 | L |

|         |   |             |             |             |   |
|---------|---|-------------|-------------|-------------|---|
| H-H_    | 0 | 1.78486900  | 4.81120200  | -3.86553900 | L |
| H-H_    | 0 | 5.15017300  | -5.14015500 | -1.80576500 | L |
| H-H_    | 0 | -0.41431400 | -3.88251800 | -4.48421700 | L |
| H-H_    | 0 | 6.20384000  | -3.68135500 | -1.73697200 | L |
| H-H_    | 0 | 1.75285000  | 3.20442100  | -4.67564500 | L |
| H-H_    | 0 | -3.03085900 | 0.88931900  | -4.78022800 | L |
| H-H_    | 0 | 2.51768000  | 3.96446200  | -1.65224300 | L |
| H-H_    | 0 | -3.71356200 | 1.95395600  | -1.86237000 | L |
| H-H_    | 0 | -1.70362000 | -4.29660300 | -1.59244200 | L |
| H-H_    | 0 | 4.37451200  | -2.20616600 | -0.99756600 | L |
| N-N_R   | 0 | 4.19886300  | 2.78780900  | -1.19950900 | L |
| N-N_R   | 0 | -2.53017300 | 3.66427800  | -1.58292300 | L |
| N-N_R   | 0 | -3.48034200 | -3.18207400 | -1.59702400 | L |
| N-N_R   | 0 | 3.17278700  | -3.89164500 | -0.64095400 | L |
| O-O_R   | 0 | 1.53497500  | 1.67972500  | -0.95750200 | H |
| O-O_R   | 0 | -1.42263600 | 1.07470600  | -1.08315400 | H |
| O-O_R   | 0 | -0.97086400 | -1.89837600 | -1.04171900 | H |
| O-O_R   | 0 | 1.96974900  | -1.30169300 | -0.66167600 | H |
| O-O_R   | 0 | 1.81748000  | 1.31818900  | -3.16824600 | H |
| O-O_R   | 0 | -1.09653700 | 1.10108500  | -3.33622700 | H |
| O-O_R   | 0 | -0.84129600 | -1.81196500 | -3.29613200 | H |
| O-O_R   | 0 | 2.01514300  | -1.58314800 | -2.92080900 | H |
| O-O_R   | 0 | 4.57721400  | 0.49900700  | -1.71550100 | L |
| O-O_R   | 0 | -4.42285300 | 3.90388600  | -0.18046900 | L |
| O-O_R   | 0 | -3.34429500 | -4.53343600 | 0.34619700  | L |
| O-O_R   | 0 | 1.02385700  | -4.38627300 | -1.52261600 | L |
| O-O_R   | 0 | 3.97888100  | 4.56305500  | 0.35882800  | L |
| O-O_R   | 0 | -0.28746500 | 4.06763100  | -2.25369600 | L |
| O-O_R   | 0 | -3.93021700 | -1.07602100 | -2.58600000 | L |
| O-O_R   | 0 | 4.65295900  | -3.50190300 | 1.17302500  | L |
| Rh-     | 0 | 0.25236000  | -0.13582800 | -0.77330700 | H |
| Rh-     | 0 | 0.47756700  | -0.24301700 | -3.19651700 | H |
| N-N_3   | 0 | -0.09144300 | 0.05028600  | 1.35920500  | H |
| S-S_3+6 | 0 | -0.41485800 | -1.35218700 | 2.25259900  | H |
| O-O_2   | 0 | -0.44184900 | -1.06081500 | 3.70122800  | H |
| O-O_R   | 0 | -2.03190100 | -1.74907900 | 1.80638300  | H |
| O-O_2   | 0 | 0.38495200  | -2.46097900 | 1.73135700  | H |
| C-C_R   | 0 | -3.02121200 | -0.88763200 | 2.28707400  | H |
| C-C_R   | 0 | -3.52626400 | 0.11089800  | 1.44264500  | H |
| C-C_R   | 0 | -3.54383900 | -1.04777400 | 3.58057900  | H |
| C-C_R   | 0 | -4.53769400 | 0.96486800  | 1.90888800  | H |
| H-H_    | 0 | -3.13732100 | 0.20456400  | 0.42651000  | H |
| C-C_R   | 0 | -4.55182000 | -0.18555000 | 4.02379400  | H |
| H-H_    | 0 | -3.14786400 | -1.83459200 | 4.22450900  | H |

|       |   |             |             |            |   |
|-------|---|-------------|-------------|------------|---|
| C-C_R | 0 | -5.06577300 | 0.85010400  | 3.20908900 | H |
| H-H_  | 0 | -4.92466400 | 1.72263000  | 1.22677900 | H |
| H-H_  | 0 | -4.93913300 | -0.32224700 | 5.03749700 | H |
| C-C_3 | 0 | -6.13285300 | 1.81628600  | 3.76318300 | H |
| C-C_3 | 0 | -5.52563500 | 2.59545000  | 4.96088700 | H |
| H-H_  | 0 | -5.20838000 | 1.91845500  | 5.77032900 | H |
| H-H_  | 0 | -6.26778700 | 3.29699600  | 5.37958100 | H |
| H-H_  | 0 | -4.64423000 | 3.17843500  | 4.64520600 | H |
| C-C_3 | 0 | -6.59823000 | 2.84448300  | 2.70898300 | H |
| H-H_  | 0 | -7.36690800 | 3.50274300  | 3.14651900 | H |
| H-H_  | 0 | -7.04273400 | 2.35779300  | 1.82524100 | H |
| H-H_  | 0 | -5.76970100 | 3.48734300  | 2.36833700 | H |
| C-C_3 | 0 | -7.37398700 | 1.02283300  | 4.24672100 | H |
| H-H_  | 0 | -8.11754800 | 1.70941200  | 4.68664300 | H |
| H-H_  | 0 | -7.11495900 | 0.27624800  | 5.01412500 | H |
| H-H_  | 0 | -7.85621400 | 0.49200200  | 3.41075900 | H |
| C-C_R | 0 | 3.20117300  | 0.87723200  | 3.21258800 | H |
| C-C_R | 0 | 3.84223500  | 1.40842800  | 4.34922400 | H |
| C-C_R | 0 | 4.61379100  | 0.59311200  | 5.18844000 | H |
| C-C_R | 0 | 4.75260500  | -0.77223800 | 4.89949800 | H |
| C-C_R | 0 | 4.11816200  | -1.31019800 | 3.77054100 | H |
| C-C_R | 0 | 3.35083800  | -0.49331400 | 2.92711000 | H |
| H-H_  | 0 | 3.75147200  | 2.47798700  | 4.56928900 | H |
| H-H_  | 0 | 5.11207100  | 1.02607200  | 6.06069900 | H |
| H-H_  | 0 | 5.35475100  | -1.41359900 | 5.54926600 | H |
| H-H_  | 0 | 4.21812500  | -2.37408200 | 3.54672600 | H |
| H-H_  | 0 | 2.86492500  | -0.92272900 | 2.04685300 | H |
| C-C_3 | 0 | 2.37983200  | 1.77570300  | 2.31032000 | H |
| H-H_  | 0 | 2.83642300  | 2.79121500  | 2.30389900 | H |
| H-H_  | 0 | 2.42470000  | 1.45197600  | 1.25524300 | H |
| C-C_3 | 0 | 0.93652300  | 2.00235300  | 2.66601600 | H |
| C-C_3 | 0 | 0.20097800  | 2.97874300  | 1.80572600 | H |
| H-H_  | 0 | 0.50153100  | 4.00397500  | 2.11039200 | H |
| H-H_  | 0 | -0.89063300 | 2.92115400  | 1.93891200 | H |
| H-H_  | 0 | 0.46191200  | 2.86828000  | 0.74222800 | H |
| C-C_3 | 0 | 0.44382300  | 1.75989900  | 4.04760100 | H |
| H-H_  | 0 | 0.82861200  | 2.57603100  | 4.69874400 | H |
| H-H_  | 0 | 0.81297000  | 0.81435800  | 4.46478400 | H |
| H-H_  | 0 | -0.65369200 | 1.78274800  | 4.10935000 | H |
| H-H_  | 0 | -0.94203500 | 0.63403300  | 1.44543300 | H |

### **<sup>3</sup>INT6**

|       |   |             |             |            |   |
|-------|---|-------------|-------------|------------|---|
| C-C_R | 0 | 2.62758400  | -5.09163100 | 1.79788600 | L |
| C-C_R | 0 | -5.23838400 | 3.94444700  | 0.58331400 | L |

|       |   |             |             |             |   |
|-------|---|-------------|-------------|-------------|---|
| C-C_R | 0 | 4.53631400  | 4.57496700  | 1.85455600  | L |
| C-C_R | 0 | -5.30973400 | -2.49374000 | -0.61104900 | L |
| C-C_3 | 0 | 5.42023100  | -2.08529900 | -2.51888900 | L |
| C-C_3 | 0 | 2.11552800  | 4.25434000  | -3.70347500 | L |
| C-C_3 | 0 | -3.77329400 | 1.02749500  | -4.41805600 | L |
| C-C_3 | 0 | -0.68876100 | -5.27034700 | -3.07330800 | L |
| C-C_3 | 0 | 0.85089700  | 4.15422800  | -4.58991400 | L |
| C-C_3 | 0 | 6.81843700  | -2.44130900 | -1.95851400 | L |
| C-C_3 | 0 | -1.16507800 | -6.67881300 | -2.64456900 | L |
| C-C_3 | 0 | -2.95840600 | 2.12873900  | -5.13624900 | L |
| C-C_3 | 0 | 4.86520300  | -3.33495400 | -3.24090000 | L |
| C-C_3 | 0 | -1.56874200 | -4.81357900 | -4.25983600 | L |
| C-C_3 | 0 | 3.31206800  | 3.61333600  | -4.44491900 | L |
| C-C_3 | 0 | -5.26596300 | 1.43600500  | -4.46298500 | L |
| C-C_3 | 0 | 2.42701000  | 5.75854700  | -3.51511100 | L |
| C-C_3 | 0 | 0.77767600  | -5.40512600 | -3.54911300 | L |
| C-C_3 | 0 | -3.64451600 | -0.30163800 | -5.20159900 | L |
| C-C_3 | 0 | 5.61760400  | -0.94324700 | -3.54486600 | L |
| C-C_R | 0 | -1.89725700 | 0.38535900  | -2.65156900 | H |
| C-C_R | 0 | -0.23468700 | -2.88614300 | -1.99231600 | H |
| C-C_R | 0 | 3.08393700  | -1.14281700 | -1.67590300 | H |
| C-C_R | 0 | 1.38405400  | 2.15398700  | -2.25279900 | H |
| C-C_3 | 0 | -3.33901900 | 0.83758800  | -2.91437300 | L |
| C-C_3 | 0 | -0.78008800 | -4.30797000 | -1.83035000 | L |
| C-C_3 | 0 | 4.50056900  | -1.61662400 | -1.32986000 | L |
| C-C_3 | 0 | 1.85630500  | 3.61203800  | -2.28897800 | L |
| C-C_R | 0 | -2.82534500 | 3.20687900  | -1.92578500 | L |
| C-C_R | 0 | -2.53428600 | -4.63073500 | 0.03826100  | L |
| C-C_R | 0 | 4.91642200  | -2.45730400 | 1.05990500  | L |
| C-C_R | 0 | 4.14923000  | 2.90063000  | -1.26845200 | L |
| C-C_R | 0 | -3.39367500 | 4.01471700  | -0.84841800 | L |
| C-C_R | 0 | -3.79094800 | -3.97143300 | 0.38791700  | L |
| C-C_R | 0 | 4.27048800  | -3.41470300 | 1.95259100  | L |
| C-C_R | 0 | 4.80993100  | 3.15725400  | 0.00739000  | L |
| C-C_R | 0 | -4.50438600 | 3.41823100  | -0.41261700 | L |
| C-C_R | 0 | -4.19119400 | -3.24239900 | -0.65330200 | L |
| C-C_R | 0 | 3.40995700  | -4.14424500 | 1.23885100  | L |
| C-C_R | 0 | 4.16963900  | 4.14885800  | 0.62713000  | L |
| C-C_R | 0 | -4.70326900 | 2.19488200  | -1.18178400 | L |
| C-C_R | 0 | -3.21616700 | -3.39421000 | -1.72857900 | L |
| C-C_R | 0 | 3.48458500  | -3.70869600 | -0.15279500 | L |
| C-C_R | 0 | 3.06454400  | 4.58451300  | -0.22285400 | L |
| C-C_R | 0 | -2.94928500 | 5.17005400  | -0.31044300 | L |
| C-C_R | 0 | -4.48214300 | -3.99953700 | 1.54371000  | L |



|       |   |             |             |             |   |
|-------|---|-------------|-------------|-------------|---|
| C-C_R | 0 | 4.41650400  | -3.58214100 | 3.27897100  | L |
| C-C_R | 0 | 5.85693200  | 2.53435700  | 0.57766900  | L |
| C-C_R | 0 | -3.65313700 | 5.73825900  | 0.70295700  | L |
| C-C_R | 0 | -5.66517900 | -3.23404200 | 1.63658400  | L |
| C-C_R | 0 | 3.62602100  | -4.56274400 | 3.90902300  | L |
| C-C_R | 0 | 6.26472800  | 2.97122700  | 1.85727800  | L |
| C-C_R | 0 | -4.78952200 | 5.15087100  | 1.16408800  | L |
| C-C_R | 0 | -6.07203800 | -2.49415000 | 0.57632500  | L |
| C-C_R | 0 | 2.71972900  | -5.31806200 | 3.13004700  | L |
| C-C_R | 0 | 5.59227100  | 3.98194800  | 2.46947200  | L |
| F-F_  | 0 | -1.81529400 | 5.75597700  | -0.77139500 | L |
| F-F_  | 0 | -4.05145500 | -4.73566500 | 2.59845800  | L |
| F-F_  | 0 | 5.28218400  | -2.82076900 | 3.99381500  | L |
| F-F_  | 0 | 6.49560500  | 1.51359100  | -0.04692700 | L |
| F-F_  | 0 | -3.21817100 | 6.89644900  | 1.25963800  | L |
| F-F_  | 0 | -6.38603800 | -3.23449000 | 2.78548600  | L |
| F-F_  | 0 | 3.72592800  | -4.77218000 | 5.24498800  | L |
| F-F_  | 0 | 7.31166000  | 2.37242600  | 2.47762700  | L |
| F-F_  | 0 | -5.49138300 | 5.71970400  | 2.17571200  | L |
| F-F_  | 0 | -7.20551400 | -1.75400700 | 0.65345300  | L |
| F-F_  | 0 | 1.94293700  | -6.26243200 | 3.71688100  | L |
| F-F_  | 0 | 5.97148900  | 4.39345700  | 3.70526800  | L |
| F-F_  | 0 | -6.37968100 | 3.34783900  | 1.00828400  | L |
| F-F_  | 0 | -5.70362900 | -1.76198500 | -1.68269700 | L |
| F-F_  | 0 | 1.75716300  | -5.80549100 | 1.03998200  | L |
| F-F_  | 0 | 3.85904300  | 5.57634100  | 2.46994600  | L |
| H-H_  | 0 | -1.07243200 | -7.40158100 | -3.48426900 | L |
| H-H_  | 0 | -3.28718000 | 2.22333300  | -6.19380800 | L |
| H-H_  | 0 | 0.99895400  | 4.70022100  | -5.54680300 | L |
| H-H_  | 0 | 7.51384800  | -2.72640300 | -2.77775000 | L |
| H-H_  | 0 | -2.23066700 | -6.66250600 | -2.33027400 | L |
| H-H_  | 0 | 6.76314300  | -3.29908600 | -1.25461600 | L |
| H-H_  | 0 | -1.87349600 | 1.90898100  | -5.14776700 | L |
| H-H_  | 0 | -0.02483700 | 4.60304800  | -4.07485400 | L |
| H-H_  | 0 | -0.55819900 | -7.05851000 | -1.79409200 | L |
| H-H_  | 0 | 7.25792200  | -1.57469400 | -1.41849000 | L |
| H-H_  | 0 | -3.11078000 | 3.11624000  | -4.65439400 | L |
| H-H_  | 0 | 0.60499300  | 3.10600900  | -4.85036100 | L |
| H-H_  | 0 | -1.43140200 | -5.49626200 | -5.12624000 | L |
| H-H_  | 0 | 5.52977700  | -3.61926400 | -4.08529000 | L |
| H-H_  | 0 | 3.44586100  | 4.08725100  | -5.44145200 | L |
| H-H_  | 0 | -5.62699200 | 1.50835600  | -5.51200900 | L |
| H-H_  | 0 | -1.31472000 | -3.79212300 | -4.60247300 | L |
| H-H_  | 0 | 3.85465500  | -3.16304400 | -3.65953100 | L |

|       |   |             |             |             |   |
|-------|---|-------------|-------------|-------------|---|
| H-H_  | 0 | 3.17049800  | 2.52886000  | -4.61470600 | L |
| H-H_  | 0 | -5.42687100 | 2.42773000  | -3.98913900 | L |
| H-H_  | 0 | -2.64505000 | -4.84179300 | -3.99261300 | L |
| H-H_  | 0 | 4.81735700  | -4.20373000 | -2.55234500 | L |
| H-H_  | 0 | 4.25647500  | 3.76258900  | -3.88204700 | L |
| H-H_  | 0 | -5.89428700 | 0.68825600  | -3.93207800 | L |
| H-H_  | 0 | 6.36509300  | -1.23353100 | -4.31476900 | L |
| H-H_  | 0 | 0.85939600  | -6.16341300 | -4.35784200 | L |
| H-H_  | 0 | 2.56775300  | 6.26076300  | -4.49695800 | L |
| H-H_  | 0 | -4.06148100 | -0.19375400 | -6.22642500 | L |
| H-H_  | 0 | 5.98731900  | -0.02451700 | -3.04141700 | L |
| H-H_  | 0 | 1.43275800  | -5.72955500 | -2.71275800 | L |
| H-H_  | 0 | -4.20606900 | -1.11265900 | -4.69088200 | L |
| H-H_  | 0 | 3.35830100  | 5.90422800  | -2.92704800 | L |
| H-H_  | 0 | 4.68316700  | -0.69590300 | -4.08475300 | L |
| H-H_  | 0 | 1.59590300  | 6.26988500  | -2.98263200 | L |
| H-H_  | 0 | -2.59209900 | -0.62366200 | -5.31952200 | L |
| H-H_  | 0 | 1.17327600  | -4.45330500 | -3.95524700 | L |
| H-H_  | 0 | -3.96810400 | 0.01342100  | -2.51470500 | L |
| H-H_  | 0 | -0.12714500 | -4.76849600 | -1.05483900 | L |
| H-H_  | 0 | 4.99546500  | -0.71847300 | -0.89574800 | L |
| H-H_  | 0 | 1.01065500  | 4.18925900  | -1.85114500 | L |
| N-N_R | 0 | -3.63786100 | 2.04265600  | -2.12352100 | L |
| N-N_R | 0 | -2.14983500 | -4.24794000 | -1.28855000 | L |
| N-N_R | 0 | 4.43588400  | -2.64168200 | -0.27423600 | L |
| N-N_R | 0 | 3.02303500  | 3.77885400  | -1.40558000 | L |
| O-O_R | 0 | -1.58270800 | 0.22502800  | -1.41605700 | H |
| O-O_R | 0 | -0.14596000 | -2.23296400 | -0.89343600 | H |
| O-O_R | 0 | 2.39742900  | -0.71579100 | -0.67915000 | H |
| O-O_R | 0 | 0.94297900  | 1.75591000  | -1.11173300 | H |
| O-O_R | 0 | -1.10892000 | 0.19090700  | -3.63261300 | H |
| O-O_R | 0 | 0.06442100  | -2.44006100 | -3.15082600 | H |
| O-O_R | 0 | 2.66823700  | -1.19918700 | -2.87975400 | H |
| O-O_R | 0 | 1.47032300  | 1.44321800  | -3.30571400 | H |
| O-O_R | 0 | -1.64372800 | 3.31323700  | -2.34650600 | L |
| O-O_R | 0 | -1.72574300 | -5.09764000 | 0.88470100  | L |
| O-O_R | 0 | 5.97329600  | -1.82777100 | 1.33099300  | L |
| O-O_R | 0 | 4.30166600  | 1.85037100  | -1.94614600 | L |
| O-O_R | 0 | -5.53828100 | 1.29146100  | -0.91010800 | L |
| O-O_R | 0 | -3.10986000 | -2.59518400 | -2.69565700 | L |
| O-O_R | 0 | 2.61873700  | -3.97535800 | -1.02694900 | L |
| O-O_R | 0 | 2.10578200  | 5.30452600  | 0.16306200  | L |
| Rh-   | 0 | 0.38949100  | -0.24828100 | -0.92172900 | H |
| Rh-   | 0 | 0.78394100  | -0.50615300 | -3.28655000 | H |

|         |   |             |             |            |   |
|---------|---|-------------|-------------|------------|---|
| N-N_3   | 0 | 0.14401200  | -0.04841300 | 1.08829600 | H |
| S-S_3+6 | 0 | -0.03847600 | -1.26272000 | 2.22638900 | H |
| O-O_2   | 0 | 0.83621500  | -2.40033400 | 1.92746500 | H |
| O-O_R   | 0 | -1.57944400 | -1.85461100 | 1.83202300 | H |
| O-O_2   | 0 | -0.09482400 | -0.64476000 | 3.56387600 | H |
| C-C_R   | 0 | -2.67770000 | -1.22157900 | 2.42827200 | H |
| C-C_R   | 0 | -3.09602100 | -1.61826000 | 3.70321500 | H |
| C-C_R   | 0 | -3.39690600 | -0.25970300 | 1.70541800 | H |
| C-C_R   | 0 | -4.24671100 | -1.04379400 | 4.26055100 | H |
| H-H_    | 0 | -2.52566600 | -2.37536300 | 4.24449100 | H |
| C-C_R   | 0 | -4.53516400 | 0.30852200  | 2.28717700 | H |
| H-H_    | 0 | -3.06059600 | 0.02555800  | 0.70625800 | H |
| C-C_R   | 0 | -4.98992000 | -0.06479100 | 3.57224400 | H |
| H-H_    | 0 | -4.55734900 | -1.37334500 | 5.25361700 | H |
| H-H_    | 0 | -5.08235600 | 1.06722400  | 1.72411500 | H |
| C-C_3   | 0 | -6.23534700 | 0.61686300  | 4.17388600 | H |
| C-C_3   | 0 | -5.92523400 | 2.12239400  | 4.39011000 | H |
| H-H_    | 0 | -5.63857900 | 2.62026500  | 3.45064700 | H |
| H-H_    | 0 | -6.80946100 | 2.64483400  | 4.79447400 | H |
| H-H_    | 0 | -5.09387700 | 2.25299600  | 5.10241800 | H |
| C-C_3   | 0 | -6.64025000 | 0.00620500  | 5.53336800 | H |
| H-H_    | 0 | -7.54497400 | 0.51022200  | 5.91193300 | H |
| H-H_    | 0 | -6.86981100 | -1.06908800 | 5.44655500 | H |
| H-H_    | 0 | -5.85164500 | 0.13133000  | 6.29379200 | H |
| C-C_3   | 0 | -7.43854100 | 0.46783500  | 3.20695500 | H |
| H-H_    | 0 | -8.32295000 | 0.98583400  | 3.61585900 | H |
| H-H_    | 0 | -7.23175700 | 0.89670200  | 2.21369000 | H |
| H-H_    | 0 | -7.70049100 | -0.59372800 | 3.06741000 | H |
| C-C_R   | 0 | 2.28875000  | 2.06844500  | 3.34450000 | H |
| C-C_R   | 0 | 3.29659800  | 1.28763000  | 2.69053300 | H |
| C-C_R   | 0 | 4.28069400  | 0.62355600  | 3.41704200 | H |
| C-C_R   | 0 | 4.30768100  | 0.70182100  | 4.82221900 | H |
| C-C_R   | 0 | 3.32103500  | 1.45032400  | 5.49111500 | H |
| C-C_R   | 0 | 2.32854800  | 2.11684500  | 4.77520300 | H |
| H-H_    | 0 | 3.27656400  | 1.20819900  | 1.59977200 | H |
| H-H_    | 0 | 5.04199200  | 0.04357500  | 2.89157400 | H |
| H-H_    | 0 | 5.08356400  | 0.17958500  | 5.38820300 | H |
| H-H_    | 0 | 3.32951100  | 1.50929800  | 6.58348800 | H |
| H-H_    | 0 | 1.57115300  | 2.68948700  | 5.31541700 | H |
| C-C_R   | 0 | 1.30999200  | 2.75730700  | 2.57291500 | H |
| C-C_3   | 0 | 0.18211900  | 3.59371300  | 3.11879700 | H |
| C-C_3   | 0 | 0.65414000  | 5.03264400  | 3.46274200 | H |
| H-H_    | 0 | 0.96887100  | 5.57318400  | 2.55541300 | H |
| H-H_    | 0 | -0.16697200 | 5.60511700  | 3.92774600 | H |

|       |   |             |            |            |   |
|-------|---|-------------|------------|------------|---|
| H-H_  | 0 | 1.50627700  | 5.02008100 | 4.16046600 | H |
| C-C_3 | 0 | -1.00205900 | 3.63528500 | 2.13295500 | H |
| H-H_  | 0 | -0.68204400 | 4.04680100 | 1.16024200 | H |
| H-H_  | 0 | -1.41876100 | 2.63137100 | 1.95459100 | H |
| H-H_  | 0 | -1.81258400 | 4.27300800 | 2.52248500 | H |
| H-H_  | 0 | -0.17581800 | 3.13279800 | 4.05857000 | H |
| H-H_  | 0 | 1.44854800  | 2.76518700 | 1.48372700 | H |
| H-H_  | 0 | 0.40884800  | 0.83432800 | 1.56443800 | H |

### **<sup>3</sup>TS6**

|       |   |             |             |             |   |
|-------|---|-------------|-------------|-------------|---|
| C-C_R | 0 | 2.94708200  | -4.76636500 | 1.69378300  | L |
| C-C_R | 0 | -5.31585100 | 3.81075400  | 1.05465800  | L |
| C-C_R | 0 | 4.50663600  | 4.29460200  | 2.25862600  | L |
| C-C_R | 0 | -5.39452900 | -2.50335700 | -1.01845900 | L |
| C-C_3 | 0 | 5.39128200  | -1.82473000 | -2.93313200 | L |
| C-C_3 | 0 | 2.02754400  | 4.65330200  | -3.31454600 | L |
| C-C_3 | 0 | -3.81744000 | 1.46547300  | -4.24950400 | L |
| C-C_3 | 0 | -0.53134600 | -4.96603800 | -3.30443200 | L |
| C-C_3 | 0 | 0.73909500  | 4.61681300  | -4.17098700 | L |
| C-C_3 | 0 | 6.83608400  | -2.23058700 | -2.55405200 | L |
| C-C_3 | 0 | -0.96825100 | -6.41308500 | -2.97391300 | L |
| C-C_3 | 0 | -2.99262700 | 2.63575800  | -4.83423600 | L |
| C-C_3 | 0 | 4.72234900  | -3.03677400 | -3.62178500 | L |
| C-C_3 | 0 | -1.38086500 | -4.47874300 | -4.50150900 | L |
| C-C_3 | 0 | 3.20467400  | 4.08557700  | -4.14109700 | L |
| C-C_3 | 0 | -5.31007900 | 1.87464900  | -4.27961700 | L |
| C-C_3 | 0 | 2.33689600  | 6.13807800  | -3.00802600 | L |
| C-C_3 | 0 | 0.95642800  | -5.01643000 | -3.72537900 | L |
| C-C_3 | 0 | -3.66943200 | 0.22387600  | -5.16251800 | L |
| C-C_3 | 0 | 5.49559600  | -0.65066800 | -3.93703200 | L |
| C-C_R | 0 | -1.97424500 | 0.64353100  | -2.52115100 | H |
| C-C_R | 0 | -0.17152300 | -2.64733700 | -2.06258800 | H |
| C-C_R | 0 | 3.19427300  | -0.85888400 | -1.79727000 | H |
| C-C_R | 0 | 1.33200300  | 2.44037600  | -2.02113600 | H |
| C-C_3 | 0 | -3.41078900 | 1.12240900  | -2.76613900 | L |
| C-C_3 | 0 | -0.70973800 | -4.08005600 | -2.01444700 | L |
| C-C_3 | 0 | 4.62796700  | -1.38200600 | -1.62971700 | L |
| C-C_3 | 0 | 1.80740700  | 3.89440000  | -1.95282100 | L |
| C-C_R | 0 | -2.90019800 | 3.36390500  | -1.51687600 | L |
| C-C_R | 0 | -2.58646500 | -4.57736100 | -0.30499800 | L |
| C-C_R | 0 | 5.35366400  | -2.36166100 | 0.63018700  | L |
| C-C_R | 0 | 4.13832300  | 3.11537100  | -1.08544000 | L |
| C-C_R | 0 | -3.46253900 | 4.03741200  | -0.34868800 | L |
| C-C_R | 0 | -3.89805000 | -4.00109400 | -0.01471100 | L |

|       |   |             |             |             |   |
|-------|---|-------------|-------------|-------------|---|
| C-C_R | 0 | 4.76118100  | -3.27164000 | 1.60602200  | L |
| C-C_R | 0 | 4.80068300  | 3.18838700  | 0.21298100  | L |
| C-C_R | 0 | -4.57187000 | 3.39323100  | 0.01585300  | L |
| C-C_R | 0 | -4.23923800 | -3.19493800 | -1.02022500 | L |
| C-C_R | 0 | 3.72764400  | -3.88804200 | 1.02978800  | L |
| C-C_R | 0 | 4.14172000  | 4.05563700  | 0.98082800  | L |
| C-C_R | 0 | -4.75649400 | 2.25223600  | -0.87392400 | L |
| C-C_R | 0 | -3.16789200 | -3.21081700 | -2.01098000 | L |
| C-C_R | 0 | 3.63420900  | -3.42314200 | -0.35087300 | L |
| C-C_R | 0 | 3.02430400  | 4.59536000  | 0.21074600  | L |
| C-C_R | 0 | -3.02417800 | 5.12930600  | 0.31252300  | L |
| C-C_R | 0 | -4.68954000 | -4.16837400 | 1.06205600  | L |
| C-C_R | 0 | 5.09867600  | -3.49543200 | 2.88848400  | L |
| C-C_R | 0 | 5.86779100  | 2.51235800  | 0.67560900  | L |
| C-C_R | 0 | -3.73482900 | 5.58326200  | 1.37751500  | L |
| C-C_R | 0 | -5.91484900 | -3.46830000 | 1.10889600  | L |
| C-C_R | 0 | 4.31651600  | -4.40608400 | 3.62481000  | L |
| C-C_R | 0 | 6.27479900  | 2.75595900  | 2.00565700  | L |
| C-C_R | 0 | -4.87394300 | 4.94906500  | 1.76416900  | L |
| C-C_R | 0 | -6.26166600 | -2.65057200 | 0.08478300  | L |
| C-C_R | 0 | 3.22258500  | -5.03948400 | 2.99152700  | L |
| C-C_R | 0 | 5.58122600  | 3.64034500  | 2.77028800  | L |
| F-F_  | 0 | -1.89118900 | 5.76570400  | -0.07850900 | L |
| F-F_  | 0 | -4.32113900 | -4.98460000 | 2.08084300  | L |
| F-F_  | 0 | 6.15036300  | -2.85904000 | 3.46170000  | L |
| F-F_  | 0 | 6.52896600  | 1.62000200  | -0.10296200 | L |
| F-F_  | 0 | -3.30681500 | 6.67643200  | 2.05740100  | L |
| F-F_  | 0 | -6.73807300 | -3.61211100 | 2.17710000  | L |
| F-F_  | 0 | 4.60445400  | -4.66576400 | 4.92414100  | L |
| F-F_  | 0 | 7.34307200  | 2.09767900  | 2.52046500  | L |
| F-F_  | 0 | -5.58456300 | 5.40587700  | 2.82526000  | L |
| F-F_  | 0 | -7.43728800 | -1.97576800 | 0.11570700  | L |
| F-F_  | 0 | 2.45181300  | -5.91556400 | 3.68289100  | L |
| F-F_  | 0 | 5.96087900  | 3.86626000  | 4.05293900  | L |
| F-F_  | 0 | -6.45654700 | 3.16790000  | 1.40700300  | L |
| F-F_  | 0 | -5.72750500 | -1.69267400 | -2.05340800 | L |
| F-F_  | 0 | 1.89794800  | -5.36480100 | 1.07494500  | L |
| F-F_  | 0 | 3.81363200  | 5.17513100  | 3.02314100  | L |
| H-H_  | 0 | -0.81808500 | -7.08245300 | -3.84882900 | L |
| H-H_  | 0 | -3.29942900 | 2.83697400  | -5.88344500 | L |
| H-H_  | 0 | 0.85328100  | 5.24821400  | -5.07870900 | L |
| H-H_  | 0 | 7.42413000  | -2.49833000 | -3.45876600 | L |
| H-H_  | 0 | -2.04414000 | -6.45232300 | -2.69919200 | L |
| H-H_  | 0 | 6.84231100  | -3.11423900 | -1.88079900 | L |

|       |   |             |             |             |   |
|-------|---|-------------|-------------|-------------|---|
| H-H_  | 0 | -1.90691500 | 2.41995600  | -4.84445700 | L |
| H-H_  | 0 | -0.12703600 | 5.00448300  | -3.59345500 | L |
| H-H_  | 0 | -0.37807100 | -6.81977800 | -2.12421500 | L |
| H-H_  | 0 | 7.35698400  | -1.39429900 | -2.03931500 | L |
| H-H_  | 0 | -3.15928900 | 3.56842300  | -4.25704400 | L |
| H-H_  | 0 | 0.49912400  | 3.59191900  | -4.51671900 | L |
| H-H_  | 0 | -1.18852500 | -5.11368700 | -5.39340600 | L |
| H-H_  | 0 | 5.29340900  | -3.32818800 | -4.52975000 | L |
| H-H_  | 0 | 3.29458200  | 4.62936100  | -5.10639900 | L |
| H-H_  | 0 | -5.64914500 | 2.06492700  | -5.32117500 | L |
| H-H_  | 0 | -1.14737600 | -3.43531500 | -4.78686200 | L |
| H-H_  | 0 | 3.68573700  | -2.81639100 | -3.94185200 | L |
| H-H_  | 0 | 3.07185300  | 3.01296000  | -4.37993100 | L |
| H-H_  | 0 | -5.48431500 | 2.80578500  | -3.69933700 | L |
| H-H_  | 0 | -2.46509500 | -4.55353600 | -4.27912700 | L |
| H-H_  | 0 | 4.70028000  | -3.91590300 | -2.94458300 | L |
| H-H_  | 0 | 4.16733200  | 4.21369500  | -3.60468500 | L |
| H-H_  | 0 | -5.94666100 | 1.07044100  | -3.85100200 | L |
| H-H_  | 0 | 6.16458000  | -0.91733700 | -4.78383200 | L |
| H-H_  | 0 | 1.10034100  | -5.71740700 | -4.57602100 | L |
| H-H_  | 0 | 2.45881100  | 6.72011400  | -3.94740000 | L |
| H-H_  | 0 | -4.08183800 | 0.43020700  | -6.17401000 | L |
| H-H_  | 0 | 5.91308300  | 0.25224800  | -3.44160200 | L |
| H-H_  | 0 | 1.58991300  | -5.36929200 | -2.88404200 | L |
| H-H_  | 0 | -4.22333900 | -0.64130400 | -4.73938100 | L |
| H-H_  | 0 | 3.27725700  | 6.23830800  | -2.42474800 | L |
| H-H_  | 0 | 4.51599900  | -0.38571200 | -4.37963500 | L |
| H-H_  | 0 | 1.51342600  | 6.59979400  | -2.42112300 | L |
| H-H_  | 0 | -2.61248500 | -0.07212800 | -5.30590400 | L |
| H-H_  | 0 | 1.32722800  | -4.02475700 | -4.05258400 | L |
| H-H_  | 0 | -4.04698400 | 0.26282100  | -2.46229900 | L |
| H-H_  | 0 | -0.09835500 | -4.58145600 | -1.22991800 | L |
| H-H_  | 0 | 5.19263800  | -0.51441600 | -1.22012600 | L |
| H-H_  | 0 | 0.97330900  | 4.43369500  | -1.44902300 | L |
| N-N_R | 0 | -3.72182300 | 2.24002600  | -1.86048700 | L |
| N-N_R | 0 | -2.10900000 | -4.06391600 | -1.55421900 | L |
| N-N_R | 0 | 4.65635500  | -2.45143200 | -0.61565300 | L |
| N-N_R | 0 | 2.99381500  | 3.98264300  | -1.08377000 | L |
| O-O_R | 0 | -1.67722100 | 0.37010400  | -1.31087700 | H |
| O-O_R | 0 | -0.02557200 | -2.09438000 | -0.91965800 | H |
| O-O_R | 0 | 2.61853900  | -0.45845600 | -0.73413400 | H |
| O-O_R | 0 | 0.90816800  | 1.96208700  | -0.90725700 | H |
| O-O_R | 0 | -1.16701100 | 0.54627200  | -3.50643500 | H |
| O-O_R | 0 | 0.06066500  | -2.09705700 | -3.19522200 | H |

|         |   |             |             |             |   |
|---------|---|-------------|-------------|-------------|---|
| O-O_R   | 0 | 2.65145700  | -0.86199400 | -2.95666800 | H |
| O-O_R   | 0 | 1.40567500  | 1.80480600  | -3.12247100 | H |
| O-O_R   | 0 | -1.72538500 | 3.52848900  | -1.93860500 | L |
| O-O_R   | 0 | -1.83493000 | -5.09639600 | 0.56318600  | L |
| O-O_R   | 0 | 6.45416700  | -1.76483400 | 0.77169500  | L |
| O-O_R   | 0 | 4.29096800  | 2.16596200  | -1.89905100 | L |
| O-O_R   | 0 | -5.79113100 | 1.53567600  | -0.93301500 | L |
| O-O_R   | 0 | -3.02083200 | -2.33634300 | -2.90486900 | L |
| O-O_R   | 0 | 2.66736200  | -3.65542000 | -1.12247900 | L |
| O-O_R   | 0 | 2.04495800  | 5.20893600  | 0.71214600  | L |
| Rh-     | 0 | 0.43522500  | -0.07521600 | -0.80711400 | H |
| Rh-     | 0 | 0.74296700  | -0.15570100 | -3.21036400 | H |
| N-N_3   | 0 | 0.01426700  | 0.09478800  | 1.26600500  | H |
| S-S_3+6 | 0 | -0.16583000 | -1.23808800 | 2.28219600  | H |
| O-O_2   | 0 | 0.90210000  | -2.19820600 | 2.00269800  | H |
| O-O_R   | 0 | -1.59850400 | -2.00860300 | 1.71823800  | H |
| O-O_2   | 0 | -0.44672500 | -0.76593400 | 3.65613500  | H |
| C-C_R   | 0 | -2.79645100 | -1.54514500 | 2.26899600  | H |
| C-C_R   | 0 | -3.26467600 | -2.08782200 | 3.47180300  | H |
| C-C_R   | 0 | -3.55400100 | -0.58281000 | 1.58278900  | H |
| C-C_R   | 0 | -4.48665700 | -1.65092200 | 3.99898300  | H |
| H-H_    | 0 | -2.66828200 | -2.84486900 | 3.98436400  | H |
| C-C_R   | 0 | -4.76469900 | -0.14854900 | 2.13701400  | H |
| H-H_    | 0 | -3.19924300 | -0.20018600 | 0.62161600  | H |
| C-C_R   | 0 | -5.25892900 | -0.66124600 | 3.35710200  | H |
| H-H_    | 0 | -4.82973900 | -2.09306200 | 4.93617100  | H |
| H-H_    | 0 | -5.33744400 | 0.61029200  | 1.59960100  | H |
| C-C_3   | 0 | -6.55907200 | -0.09934500 | 3.96907800  | H |
| C-C_3   | 0 | -6.27344800 | 1.34035900  | 4.47567100  | H |
| H-H_    | 0 | -5.91483400 | 1.99169900  | 3.66336800  | H |
| H-H_    | 0 | -7.18742400 | 1.79263600  | 4.89851100  | H |
| H-H_    | 0 | -5.49924700 | 1.33247100  | 5.26076800  | H |
| C-C_3   | 0 | -7.05813800 | -0.94425800 | 5.16256200  | H |
| H-H_    | 0 | -8.00992600 | -0.53209600 | 5.53706300  | H |
| H-H_    | 0 | -7.23810700 | -1.99289100 | 4.87203100  | H |
| H-H_    | 0 | -6.34595100 | -0.93610400 | 6.00405400  | H |
| C-C_3   | 0 | -7.69289600 | -0.06070800 | 2.91342300  | H |
| H-H_    | 0 | -8.60250600 | 0.38428300  | 3.35161300  | H |
| H-H_    | 0 | -7.42719200 | 0.53869000  | 2.02865200  | H |
| H-H_    | 0 | -7.94541500 | -1.07678300 | 2.57014100  | H |
| C-C_R   | 0 | 2.23553300  | 1.14701600  | 3.19068100  | H |
| C-C_R   | 0 | 3.38815300  | 0.71694800  | 2.46674900  | H |
| C-C_R   | 0 | 4.45362200  | 0.10833500  | 3.12554300  | H |
| C-C_R   | 0 | 4.39474300  | -0.11931200 | 4.51157500  | H |

|       |   |             |             |            |   |
|-------|---|-------------|-------------|------------|---|
| C-C_R | 0 | 3.24766800  | 0.25309800  | 5.23723000 | H |
| C-C_R | 0 | 2.18046100  | 0.87242400  | 4.59146100 | H |
| H-H_  | 0 | 3.41559400  | 0.85808800  | 1.38425900 | H |
| H-H_  | 0 | 5.34200500  | -0.18669700 | 2.56495000 | H |
| H-H_  | 0 | 5.23412100  | -0.59787500 | 5.02334600 | H |
| H-H_  | 0 | 3.19022900  | 0.05137200  | 6.31012500 | H |
| H-H_  | 0 | 1.28876700  | 1.13926800  | 5.16041900 | H |
| C-C_R | 0 | 1.21041600  | 1.86633100  | 2.50077900 | H |
| C-C_3 | 0 | 0.11474800  | 2.63694500  | 3.18928400 | H |
| C-C_3 | 0 | 0.75081800  | 3.87961900  | 3.88687500 | H |
| H-H_  | 0 | 1.15025000  | 4.58628100  | 3.14279800 | H |
| H-H_  | 0 | -0.02272000 | 4.40593900  | 4.47033400 | H |
| H-H_  | 0 | 1.56947600  | 3.59665700  | 4.56469700 | H |
| C-C_3 | 0 | -1.00348700 | 3.11179600  | 2.24027600 | H |
| H-H_  | 0 | -0.58674000 | 3.56597900  | 1.32650000 | H |
| H-H_  | 0 | -1.68145500 | 2.29843200  | 1.93679000 | H |
| H-H_  | 0 | -1.62894200 | 3.86640100  | 2.74370900 | H |
| H-H_  | 0 | -0.33009000 | 2.00416600  | 3.97718800 | H |
| H-H_  | 0 | 1.41802300  | 2.13324600  | 1.45995200 | H |
| H-H_  | 0 | -0.84174900 | 0.66174400  | 1.37238500 | H |
